# Supplementary material for: A Shared Role for RBF1 and dCAP-D3 in the Regulation of Transcription with Consequences for Innate Immunity
Source: PLoS Genet. 2012 Apr 5;8(4):e1002618. doi: 10.1371/journal.pgen.1002618 (PMC3320600; doi:10.1371/journal.pgen.1002618)
Supplement: Table S1 — Microarray data from multiple samples of wild type cDNA, dCAP-D3 mutant cDNA, and RBF1 mutant cDNA. Experiments were performed using Nimblegen 385 k whole genome arrays. A detailed description of the information found in each column is provided to the right of the table. (XLS) [file pgen.1002618.s010.xls]

## Sheet: Sheet1
	Gene Name	D3adult - WTadult_M	D3adult - WTadult_p	RBF1adult - WTadult_M	RBF1adult - WTadult_p	D3larvae - WTlarvae_M	D3larvae - WTlarvae_p	RBF1larvae - WTlarvae_M	RBF1larvae - WTlarvae_p	sig.D3adult...WTadult	sig.RBF1adult...WTadult	sig.intersectAdult	sig.D3larvae...WTlarvae	sig.RBF1larvae...WTlarvae	sig.intersectLarva			KEY:
FBtr0088160	epsilonTry	8.81501	8.39278e-06	8.41519	1.21855e-05	10.0284	1.12397e-05	10.3806	8.15927e-06	1	1	1	1	1	1
FBtr0077271	CG1304	6.82948	8.59955e-06	6.70749	1.21855e-05	6.12424	2.81419e-05	6.61129	1.39207e-05	1	1	1	1	1	1			Column A= Flybase transcript numbers
FBtr0088121	lambdaTry	8.73102	1.99924e-06	7.86597	4.34638e-06	4.12335	0.000268324	6.29856	1.39207e-05	1	1	1	1	1	1			Column B= Gene Name
FBtr0088122	betaTry	4.76389	0.0026486	4.67606	0.00227591	5.69325	0.000795633	6.25615	0.000219598	1	1	1	1	1	1			Column C= Log fold change for dCAP-D3 mutant adults vs. wild type adults
FBtr0075048	CG3819	3.63959	0.00104489	3.6283	0.000563549	5.16188	6.53203e-05	5.57748	3.25985e-05	1	1	1	1	1	1			Column D= p-values corresponding to data in column C
FBtr0085078	CG6296	4.46996	0.00676533	4.38443	0.00563232	5.12262	0.00258163	5.35667	0.000962797	1	1	1	1	1	1			Column E= Log fold change for RBF1 mutant adults vs. wild type adults
FBtr0084130	CG42335	6.09744	8.39278e-06	6.09856	9.84133e-06	3.52329	0.000338135	4.3875	5.27088e-05	1	1	1	1	1	1			Column F= p-values corresponding to data in column F
FBtr0088591	Cyp4p2	6.48352	8.39278e-06	4.83769	0.000102615	5.73184	2.81419e-05	4.22485	0.00011664	1	1	1	1	1	1			Column G= Log fold change for dCAP-D3 mutant larvae vs. wild type larvae
FBtr0086514	CG18607	1.70709	0.0126986	1.40494	0.0221455	3.61746	0.000128343	3.13916	0.000146233	1	1	1	1	1	1			Column H= p-values corresponding to data in column G
FBtr0085605	CG7912	2.23337	0.0599503	1.90845	0.0735238	2.31532	0.0431318	3.12678	0.00408058	1	1	1	1	1	1			Column I= Log fold change for RBF1 mutant larvae vs. wild type larvae
FBtr0084254	CG7054	1.47006	0.0150814	1.55335	0.00802259	2.30376	0.000950153	3.11551	0.000110352	1	1	1	1	1	1			Column J= p-values corresponding to data in column I
FBtr0080754	CG7631	2.37632	0.0945549	1.93972	0.117887	2.46874	0.0682811	2.99706	0.0127206	1	1	1	1	1	1			Column K= significance indicator for dCAP-D3 regulated genes in adults (1=significantly upregulated, 0=no significance, -1=significantly downregulated)
FBtr0075157	CG5506	1.05676	0.125814	0.896546	0.129534	2.21266	0.00403771	2.89292	0.000351223	1	1	1	1	1	1			Column L= significance indicator for RBF1 regulated genes in adults (1=significantly upregulated, 0=no significance, -1=significantly downregulated)
FBtr0085604	CG7920	1.71506	0.0842152	1.80424	0.0513237	1.517	0.0997466	2.86929	0.00292166	1	1	1	1	1	1			Column M= significance indicator for dCAP-D3/RBF1 shared target genes in adults (1=significantly upregulated, 0=no significance, -1=significantly downregulated)
FBtr0076312	CG42825	2.72228	0.0486767	1.84339	0.121691	3.02851	0.0278851	2.75974	0.0156289	1	1	1	1	1	1			Column N= significance indicator for dCAP-D3 regulated genes in larvae (1=significantly upregulated, 0=no significance, -1=significantly downregulated)
FBtr0076654	CG6673	2.9625	0.00183123	2.84816	0.00158223	2.98426	0.00117862	2.71932	0.00113221	1	1	1	1	1	1			Column O= significance indicator for RBF1 regulated genes in larvae (1=significantly upregulated, 0=no significance, -1=significantly downregulated)
FBtr0100131	CG9918	3.06201	0.00129386	3.32547	0.000563549	1.87937	0.0140037	2.44303	0.00154451	1	1	1	1	1	1			Column P= significance indicator for dCAP-D3/RBF1 shared target genes in larvae (1=significantly upregulated, 0=no significance, -1=significantly downregulated)
FBtr0072943	Acp62F	1.87564	0.0289086	2.17159	0.0105698	2.81618	0.00299282	2.30085	0.00344561	1	1	1	1	1	1
FBtr0070676	CG3568	0.991258	0.087652	1.90879	0.00305571	0.865089	0.109628	2.2184	0.000672674	1	1	1	1	1	1
FBtr0077310	CG1702	1.23233	0.0656358	1.51176	0.0200694	2.80014	0.000795633	2.21358	0.00147586	1	1	1	1	1	1
FBtr0086264	obp57d	2.54835	0.00526956	1.14721	0.106752	2.6086	0.00403771	2.15925	0.00402079	1	1	1	1	1	1
FBtr0084131	burs	3.34521	0.0021469	5.02725	0.000164173	2.31614	0.0135242	2.01468	0.00989672	1	1	1	1	1	1
FBtr0079548	cg12560	2.2971	0.0272008	1.60342	0.0773067	2.11963	0.0337971	1.96763	0.017032	1	1	1	1	1	1
FBtr0077272	Ser6	2.02483	0.0234316	1.49943	0.05609	1.40499	0.0800192	1.88365	0.0102773	1	1	1	1	1	1
FBtr0085343	Ssl2	2.88112	0.00117357	2.61852	0.00126197	1.20415	0.0599307	1.79175	0.00402983	1	1	1	1	1	1
FBtr0070878	Btd	2.05812	0.00129386	2.52006	0.000268565	2.70517	0.00016928	1.61821	0.00155038	1	1	1	1	1	1
FBtr0088314	CG12895	1.63725	0.0267643	1.73623	0.014352	1.79023	0.0145328	1.51285	0.0121652	1	1	1	1	1	1
FBtr0085951	CG3635	0.882669	0.119931	1.10703	0.0395117	1.63193	0.00718846	1.50106	0.00412347	1	1	1	1	1	1
FBtr0084918	CG31380	2.54252	0.00294643	2.3006	0.00384236	2.07382	0.00805143	1.36319	0.021548	1	1	1	1	1	1
FBtr0071803	CG11475	1.24977	0.0484064	2.62165	0.000852566	1.02198	0.0839118	1.28397	0.0145372	1	1	1	1	1	1
FBtr0075591	CG7650	1.5873	0.00676533	1.99179	0.00135284	1.45555	0.00862149	1.19813	0.00866797	1	1	1	1	1	1
FBtr0070490	w	2.35398	0.0267643	2.015	0.0394746	1.84712	0.0594145	1.18283	0.106561	1	1	1	1	1	1
FBtr0087817	CG30486	1.27914	0.0525995	1.21996	0.0478008	1.49753	0.0229591	1.15815	0.0266435	1	1	1	1	1	1
FBtr0075729	CG3868	0.920489	0.093639	1.41852	0.0111265	0.827602	0.10457	1.012	0.022365	1	1	1	1	1	1
FBtr0072601	CG13897	1.73921	0.00689727	1.89268	0.00305664	1.76039	0.00549224	0.778036	0.0691358	1	1	1	1	1	1
FBtr0075663	CG18649	0.79797	0.587706	0.998298	0.239181	3.64877	0.00271599	6.5088	5.27088e-05	0	0	0	1	1	1
FBtr0075664	CG13461	0.672598	0.933383	1.80885	0.229015	4.87783	0.0130008	6.26153	0.00147289	0	0	0	1	1	1
FBtr0077220	lcs	-0.0605995	0.995616	-0.51264	0.2801	4.99143	2.14976e-05	5.53503	8.26365e-06	0	0	0	1	1	1
FBtr0078005	CG13947	0.0484852	0.998025	1.31563	0.483178	3.70644	0.107917	5.04601	0.0146568	0	0	0	1	1	1
FBtr0071783	CG3292	0.967658	0.253122	0.108622	0.87473	3.19389	0.00104269	4.7889	6.46863e-05	0	0	0	1	1	1
FBtr0082619	Cyp313a5	-0.0853792	0.995616	0.136813	0.846044	2.17099	0.0131584	4.37237	0.000117734	0	0	0	1	1	1
FBtr0073194	Gr64a	1.13229	0.428362	1.18763	0.222641	3.92151	0.00403771	4.32318	0.00103543	0	0	0	1	1	1
FBtr0073197	Gr64d	0.0248451	0.996486	0.512535	0.37562	2.96656	0.00102047	3.97767	0.000117734	0	0	0	1	1	1
FBtr0084052	CG5892	0.371527	0.988597	2.12642	0.122586	2.89625	0.0570725	3.77113	0.00723924	0	1	0	1	1	1
FBtr0073606	CG15741	0.917577	0.586207	1.98138	0.0732872	2.16026	0.0615196	3.75989	0.00216894	0	1	0	1	1	1
FBtr0070523	ng1	-0.264703	0.995616	0.941151	0.39086	2.76193	0.0469106	3.75822	0.00432059	0	0	0	1	1	1
FBtr0075765	CG9040	0.0146926	0.997933	-0.058928	0.916753	3.89754	7.51362e-05	3.74561	6.46863e-05	0	0	0	1	1	1
FBtr0087077	CG15615	1.50438	0.0470805	-0.294943	0.6076	1.61169	0.0303628	3.70643	0.000146233	1	0	0	1	1	1
FBtr0083890	MtnB	0.44167	0.895152	-0.882805	0.28343	2.02783	0.0467738	3.58934	0.00127596	0	0	0	1	1	1
FBtr0087796	CG13324	1.05624	0.201811	-0.35446	0.567807	2.22539	0.00979236	3.58114	0.000297767	0	0	0	1	1	1
FBtr0080785	CG15255	0.393062	0.822551	-0.202164	0.751507	2.8099	0.00199956	3.54641	0.000263179	0	0	0	1	1	1
FBtr0074729	CG14204	0.667428	0.503466	0.0726616	0.917969	1.81395	0.0229591	3.49965	0.000289927	0	0	0	1	1	1
FBtr0086133	Cyp6a2	2.16864	0.136232	1.71844	0.153623	4.0739	0.00811868	3.49841	0.00662438	1	0	0	1	1	1
FBtr0073196	Gr64c	0.271633	0.942474	0.81185	0.205791	2.48821	0.00465195	3.46717	0.000297767	0	0	0	1	1	1
FBtr0077218	CG10918	0.5059	0.836943	0.908583	0.270144	1.73539	0.0778573	3.44565	0.0015226	0	0	0	1	1	1
FBtr0073937	Ag5r	-0.375529	0.77158	-1.26754	0.0435677	2.47555	0.00150049	3.4423	0.000117734	0	-1	0	1	1	1
FBtr0073201	Gr64f	0.074182	0.995616	0.910676	0.137332	2.33053	0.00403771	3.3471	0.000227841	0	1	0	1	1	1
FBtr0087747	CG4716	0.504905	0.538627	0.253352	0.60091	2.97366	0.000400381	3.33101	0.000117734	0	0	0	1	1	1
FBtr0084287	CG33093	4.16878	0.0289989	1.68864	0.252995	4.43196	0.0177652	3.30871	0.0260284	1	0	0	1	1	1
FBtr0082482	Hsp70Ab	1.58993	0.308237	1.11641	0.319497	1.90971	0.149456	3.23515	0.0095303	0	0	0	1	1	1
FBtr0091448	ppk13	1.49975	0.0184511	0.706763	0.155987	4.49792	2.81419e-05	3.22495	0.000117734	1	0	0	1	1	1
FBtr0070541	CG14265	-0.698484	0.8287	0.917401	0.398324	2.07829	0.113502	3.22093	0.00879162	0	0	0	1	1	1
FBtr0086321	ppk6	-0.0458344	0.996486	-0.120236	0.882619	1.96288	0.0364501	3.17544	0.00151329	0	0	0	1	1	1
FBtr0076230	CG32073	0.0763134	0.995616	0.194037	0.842293	2.87048	0.0152398	3.1465	0.00368174	0	0	0	1	1	1
FBtr0085956	CG17018	-0.0562759	0.996486	-0.676553	0.526054	3.42834	0.0157532	3.0691	0.0106462	0	0	0	1	1	1
FBtr0076588	CG32023	0.334697	0.95082	0.0550148	0.953952	2.59797	0.0152398	3.01946	0.0029618	0	0	0	1	1	1
FBtr0076854	CG8562	0.87487	0.223931	0.781502	0.175675	1.73175	0.0152398	3.01679	0.000327435	0	0	0	1	1	1
FBtr0087746	CG4716	0.532418	0.433411	-0.0464027	0.928159	2.53043	0.000643608	3.0166	0.000117734	0	0	0	1	1	1
FBtr0071739	CG4377	-0.60489	0.8745	-0.72464	0.480937	3.00821	0.0275089	2.85839	0.0127206	0	0	0	1	1	1
FBtr0076192	Cpr67Fa2	0.151154	0.995616	-0.0591801	0.938786	2.11006	0.0153749	2.81186	0.00155038	0	0	0	1	1	1
FBtr0073195	Gr64b	0.263837	0.973018	0.36038	0.625198	1.66552	0.0670232	2.79668	0.00278591	0	0	0	1	1	1
FBtr0080140	CG17134	0.0209959	0.996486	0.225762	0.658385	2.60766	0.000987403	2.78077	0.000339917	0	0	0	1	1	1
FBtr0080341	CG17217	0.457951	0.736476	3.00786	0.00110662	1.07163	0.125492	2.7012	0.00103543	0	1	0	1	1	1
FBtr0071624	CG15661	-0.88164	0.0874915	0.319759	0.416349	1.50411	0.00708327	2.63562	0.000126166	-1	0	0	1	1	1
FBtr0075156	CG16775	1.26376	0.0842152	0.780678	0.189437	1.18766	0.0834567	2.51274	0.0012618	1	0	0	1	1	1
FBtr0073037	CG32284	2.27324	0.0141551	0.353416	0.59321	2.5642	0.00623579	2.4893	0.00297194	1	0	0	1	1	1
FBtr0077986	Iris	0.612767	0.312921	-0.702093	0.137787	2.65473	0.000400381	2.47365	0.000289927	0	-1	0	1	1	1
FBtr0084101	CG3301	1.47783	0.250215	1.28109	0.201052	2.56584	0.0352262	2.46083	0.0159931	0	0	0	1	1	1
FBtr0089914	CG6475	-0.117685	0.995616	-0.0809601	0.91444	2.63892	0.00504259	2.40746	0.00313652	0	0	0	1	1	1
FBtr0088191	CG9080	-0.610635	0.686659	-0.595689	0.406207	1.92331	0.0361108	2.38298	0.00511875	0	0	0	1	1	1
FBtr0077540	CG31955	0.145426	0.995616	1.6754	0.0271428	1.50307	0.0486034	2.35173	0.00245796	0	1	0	1	1	1
FBtr0100098	CG34043	0.874804	0.362506	0.622259	0.343172	1.60399	0.05066	2.34194	0.00344561	0	0	0	1	1	1
FBtr0071822	CG13506	1.76643	0.0342622	0.510027	0.410979	1.99519	0.015376	2.33006	0.00301718	1	0	0	1	1	1
FBtr0079498	CG7203	0.834043	0.521116	-1.17682	0.163482	1.56557	0.0986647	2.32176	0.00889362	0	0	0	1	1	1
FBtr0073200	Gr64e	0.391338	0.790521	1.12794	0.0801501	1.4942	0.0348503	2.31445	0.00163268	0	1	0	1	1	1
FBtr0073328	CG13721	0.355225	0.995423	-0.00530704	0.997038	2.16482	0.144925	2.28683	0.0578928	0	0	0	1	1	1
FBtr0076589	CG13311	-0.849171	0.331909	0.0762213	0.913367	1.6336	0.0358345	2.24775	0.00311307	0	0	0	1	1	1
FBtr0088849	CG8791	0.244067	0.912628	0.151964	0.763406	1.58157	0.0135242	2.23156	0.000962797	0	0	0	1	1	1
FBtr0075384	CG4842	0.115017	0.995616	-0.192908	0.831861	2.80462	0.0131584	2.22952	0.014049	0	0	0	1	1	1
FBtr0077973	CG5011	-0.221746	0.995616	-0.0516088	0.966371	1.94473	0.103802	2.20857	0.0299163	0	0	0	1	1	1
FBtr0072090	CG11300	0.292622	0.925474	0.153015	0.813931	1.33357	0.0711848	2.20708	0.00311307	0	0	0	1	1	1
FBtr0078475	CG7458	-0.202921	0.925782	0.517248	0.231272	0.771394	0.124346	2.18157	0.000486282	0	0	0	1	1	1
FBtr0070539	ng3	0.0256696	0.996486	0.39937	0.50738	1.617	0.037334	2.1706	0.00362621	0	0	0	1	1	1
FBtr0070540	ng2	-0.432101	0.934783	0.178832	0.860951	2.37506	0.0437527	2.16095	0.0256592	0	0	0	1	1	1
FBtr0100060	CG34005	-0.397516	0.918926	-0.856879	0.290595	1.65944	0.087154	2.13031	0.0136978	0	0	0	1	1	1
FBtr0076173	CG7560	-0.30491	0.77158	-0.113063	0.801032	1.75158	0.00391323	2.10545	0.000580336	0	0	0	1	1	1
FBtr0088061	Damm	0.503995	0.943939	-1.11055	0.336191	1.99309	0.145126	2.10042	0.0587581	0	0	0	1	1	1
FBtr0086810	CG14495	1.35739	0.181737	1.5189	0.0907954	2.03115	0.0379618	2.0956	0.0130718	0	1	0	1	1	1
FBtr0082860	CG9757	-0.983789	0.22665	-0.528891	0.385994	1.15488	0.117608	2.08038	0.00438459	0	0	0	1	1	1
FBtr0074389	CG5070	-0.370193	0.900641	0.99964	0.174771	1.60113	0.0599307	2.05888	0.00847017	0	0	0	1	1	1
FBtr0079468	CG5160	-0.583112	0.428362	0.144021	0.779244	1.23889	0.0414486	2.04211	0.00156584	0	0	0	1	1	1
FBtr0091449	CG33509	0.00364298	0.999741	-1.24305	0.120759	4.01417	0.000702997	2.04132	0.0102773	0	-1	0	1	1	1
FBtr0088593	Cyp4p3	0.564543	0.298678	0.623427	0.143061	1.24666	0.0153749	1.99176	0.00057418	0	1	0	1	1	1
FBtr0082375	Ugt35b	0.0410308	0.996486	-1.11672	0.13362	1.65929	0.0488911	1.94037	0.00977285	0	-1	0	1	1	1
FBtr0081102	CG17235	-0.981192	0.511454	-1.04093	0.26883	2.1246	0.0600865	1.92594	0.0363756	0	0	0	1	1	1
FBtr0070815	Cpr5C	0.159354	0.995616	0.0233671	0.979711	1.98687	0.0518593	1.90412	0.0245845	0	0	0	1	1	1
FBtr0087338	CG12963	0.533978	0.605143	0.976741	0.122262	1.4149	0.0467681	1.90288	0.00448754	0	1	0	1	1	1
FBtr0084827	CG11893	-0.623947	0.443547	-0.74683	0.181819	1.72822	0.0140037	1.90159	0.00331619	0	0	0	1	1	1
FBtr0087222	Jhedup	-0.28832	0.948212	-0.344038	0.609793	2.29958	0.012229	1.89373	0.011243	0	0	0	1	1	1
FBtr0086726	GstE10	1.42937	0.216154	1.29217	0.166508	1.8309	0.0853549	1.85446	0.0346174	0	0	0	1	1	1
FBtr0083193	rec	1.08905	0.402726	1.2466	0.176045	2.14275	0.0486034	1.8475	0.0338846	0	0	0	1	1	1
FBtr0071827	Mes4	-0.139376	0.995616	0.141841	0.84804	1.2881	0.117205	1.8209	0.0139665	0	0	0	1	1	1
FBtr0086265	Obp57e	0.620556	0.580352	0.162138	0.81208	1.84103	0.0251889	1.81821	0.00996398	0	0	0	1	1	1
FBtr0080496	CG9928	-0.0466953	0.996486	0.39711	0.537912	1.69463	0.0398098	1.80422	0.0120617	0	0	0	1	1	1
FBtr0075060	CG6865	0.0778055	0.995616	0.224104	0.648466	1.90338	0.00599988	1.79588	0.00311307	0	0	0	1	1	1
FBtr0087722	CG13325	-0.825681	0.816176	-0.00251124	0.998905	2.16514	0.144059	1.77283	0.121762	0	0	0	1	1	1
FBtr0072109	CG10332	-1.03812	0.153368	-0.146449	0.807893	0.961985	0.144937	1.74494	0.00656691	0	0	0	1	1	1
FBtr0080237	sala	-2.41529	0.10934	-0.841413	0.462061	2.77299	0.056384	1.73881	0.107457	-1	0	0	1	1	1
FBtr0085213	CG5402	-0.351516	0.988151	0.765375	0.498283	2.01526	0.143743	1.70969	0.10934	0	0	0	1	1	1
FBtr0071242	CG15347	0.680275	0.261337	0.310164	0.480088	0.915065	0.0938857	1.70824	0.00271945	0	0	0	1	1	1
FBtr0076666	Jon66Cii	-0.28932	0.960189	0.271144	0.726152	1.60555	0.0783919	1.70235	0.0271656	0	0	0	1	1	1
FBtr0083901	CG4367	0.324859	0.782626	0.0527052	0.91912	0.97563	0.0764768	1.7018	0.00278596	0	0	0	1	1	1
FBtr0074377	SmG	0.62221	0.681765	0.828527	0.26912	1.55281	0.0814061	1.67411	0.0266435	0	0	0	1	1	1
FBtr0081830	CG31464	0.0961306	0.995616	0.207515	0.814458	1.52029	0.12374	1.66611	0.0409764	0	0	0	1	1	1
FBtr0077026	CG18586	0.231437	0.975865	-0.155202	0.829424	1.35619	0.0941771	1.64536	0.0189933	0	0	0	1	1	1
FBtr0088948	CG1358	0.213125	0.931225	-0.417684	0.352963	1.17388	0.0384908	1.64065	0.00315972	0	0	0	1	1	1
FBtr0074626	CG15043	0.647396	0.380365	0.43542	0.379911	1.32468	0.0361108	1.63901	0.00511912	0	0	0	1	1	1
FBtr0076243	CG6327	0.282859	0.882639	-0.156198	0.769166	0.871197	0.144059	1.60794	0.00578989	0	0	0	1	1	1
FBtr0088838	phr	0.678097	0.402107	0.698244	0.21395	1.32753	0.0491325	1.60388	0.00847017	0	0	0	1	1	1
FBtr0072968	CG16762	0.369349	0.769606	0.152719	0.774044	1.2428	0.0484212	1.5969	0.00590076	0	0	0	1	1	1
FBtr0071625	CG4302	0.401859	0.736553	-0.0863946	0.877783	1.17679	0.0620862	1.59399	0.00677148	0	0	0	1	1	1
FBtr0072732	CG32318	-0.229042	0.973211	1.49825	0.0524681	1.41719	0.0729749	1.56188	0.0205108	0	1	0	1	1	1
FBtr0087818	CG30488	1.53773	0.0709488	0.695626	0.295646	2.52224	0.00623579	1.53407	0.0241052	1	0	0	1	1	1
FBtr0073511	CG11697	6.95652	9.66181e-06	0.331213	0.626497	5.52074	7.03213e-05	1.49932	0.03085	1	0	0	1	1	1
FBtr0072625	CG13912	0.607933	0.425849	0.370719	0.449724	0.919752	0.125153	1.49573	0.0084137	0	0	0	1	1	1
FBtr0071978	RpL37b	-0.125268	0.995616	0.418492	0.464831	1.22118	0.0868895	1.4776	0.017136	0	0	0	1	1	1
FBtr0070234	png	-0.571498	0.678086	0.561997	0.39677	1.72036	0.0408834	1.46074	0.0309928	0	0	0	1	1	1
FBtr0086478	Obp56c	-0.257936	0.797951	-0.164335	0.660531	0.681189	0.125153	1.43586	0.00245796	0	0	0	1	1	1
FBtr0085043	CG14247	-0.183423	0.974842	0.444639	0.3942	1.33492	0.0433749	1.41967	0.0129695	0	0	0	1	1	1
FBtr0076579	CG13307	-0.309165	0.823773	-0.748153	0.147405	1.55374	0.014553	1.41891	0.00858997	0	-1	0	1	1	1
FBtr0083246	glob1	0.476116	0.524665	-0.469773	0.306183	1.03034	0.0641847	1.41803	0.00659668	0	0	0	1	1	1
FBtr0082932	CG3321	0.210101	0.971388	-0.435183	0.442901	1.19638	0.0886533	1.37879	0.02209	0	0	0	1	1	1
FBtr0084434	CG13822	-0.950622	0.170754	-0.131469	0.817287	1.30126	0.0493331	1.36208	0.0159931	0	0	0	1	1	1
FBtr0080781	Or35a	-0.197688	0.995423	0.216861	0.775371	2.60049	0.00805143	1.34915	0.0516661	0	0	0	1	1	1
FBtr0082908	CG14356	0.894521	0.150584	0.618862	0.212529	1.52138	0.0152398	1.34064	0.0108063	0	0	0	1	1	1
FBtr0085618	CG18404	-0.744305	0.522918	-0.624654	0.37562	1.45568	0.090466	1.32368	0.0534855	0	0	0	1	1	1
FBtr0091756	gdl-ORF39	0.809114	0.37019	0.805537	0.209142	1.15885	0.116604	1.30307	0.0345641	0	0	0	1	1	1
FBtr0071778	Oatp58Db	0.142534	0.995616	1.44247	0.0427538	1.24154	0.0783919	1.30158	0.0283692	0	1	0	1	1	1
FBtr0087738	CG4627	0.80219	0.50746	1.99518	0.0311578	1.59253	0.0798284	1.29533	0.0693619	0	1	0	1	1	1
FBtr0077507	CG10039	-0.809165	0.667192	-0.769434	0.403198	1.626	0.141941	1.28984	0.128736	0	0	0	1	1	1
FBtr0072879	CG13806	0.401983	0.869693	1.23898	0.113105	1.38198	0.0974072	1.25576	0.0595741	0	1	0	1	1	1
FBtr0082981	CG8066	0.438421	0.915554	0.0730366	0.94268	1.82516	0.083423	1.25054	0.116588	0	0	0	1	1	1
FBtr0085061	CG5491	0.808243	0.411579	1.11846	0.124889	2.59078	0.00521916	1.24121	0.0503622	0	1	0	1	1	1
FBtr0076571	Cp18	0.633021	0.635911	0.0583245	0.942787	1.65521	0.056384	1.23484	0.0647203	0	0	0	1	1	1
FBtr0087615	DJ-1alpha	0.424625	0.680002	0.587609	0.250834	1.17834	0.056384	1.22403	0.0191004	0	0	0	1	1	1
FBtr0072871	CG8960	-0.262397	0.931225	0.182853	0.752898	2.26858	0.0042746	1.21197	0.03085	0	0	0	1	1	1
FBtr0072630	LysE	1.51917	0.0418546	0.453616	0.413198	1.29893	0.0601883	1.20761	0.0332755	1	0	0	1	1	1
FBtr0072080	CG5431	-0.35611	0.745026	-0.571324	0.232751	1.27678	0.0323349	1.20604	0.0155579	0	0	0	1	1	1
FBtr0082176	Npc2c	0.356573	0.832193	0.672172	0.244824	1.04778	0.119982	1.20167	0.0333721	0	0	0	1	1	1
FBtr0073372	CG12027	1.15389	0.035523	-0.12299	0.77985	1.35609	0.0140037	1.19757	0.00956507	1	0	0	1	1	1
FBtr0073812	CG11158	0.404785	0.682162	0.207596	0.667333	0.90068	0.116129	1.19479	0.0177084	0	0	0	1	1	1
FBtr0076442	CG4446	0.720732	0.428362	1.16698	0.0907954	1.04037	0.143743	1.18926	0.0434606	0	1	0	1	1	1
FBtr0082897	CG9624	-0.0112667	0.998597	-0.430008	0.434887	0.992762	0.138225	1.16952	0.0370943	0	0	0	1	1	1
FBtr0083303	CG14903	0.0365507	0.996486	0.419335	0.547491	1.30583	0.124346	1.16323	0.0815233	0	0	0	1	1	1
FBtr0088199	Obp47a	-0.498679	0.879602	-0.245161	0.7942	1.60044	0.127003	1.16242	0.145374	0	0	0	1	1	1
FBtr0082931	CG3321	0.611576	0.393124	-0.106836	0.837995	0.917553	0.112741	1.15185	0.021548	0	0	0	1	1	1
FBtr0070505	CG2652	0.131531	0.995616	0.415761	0.568128	1.29574	0.142686	1.15005	0.0971794	0	0	0	1	1	1
FBtr0083894	CG4335	0.648356	0.396625	-0.140593	0.798505	1.0271	0.0959086	1.14824	0.0284027	0	0	0	1	1	1
FBtr0089836	CG33170	0.599026	0.588223	0.30334	0.621896	1.31818	0.0800192	1.14718	0.0549629	0	0	0	1	1	1
FBtr0088359	Obp46a	-0.351139	0.893289	0.578521	0.365471	2.13479	0.0131584	1.14521	0.062375	0	0	0	1	1	1
FBtr0073356	CG32237	0.11126	0.995616	0.227995	0.676348	1.03728	0.108052	1.1442	0.0339236	0	0	0	1	1	1
FBtr0076908	CG14823	1.214	0.0796308	0.770121	0.176673	0.989654	0.124346	1.14369	0.0338846	1	0	0	1	1	1
FBtr0076209	CG12522	0.130963	0.995616	0.168035	0.789946	2.75455	0.00199956	1.13528	0.0491895	0	0	0	1	1	1
FBtr0082205	CG11722	0.228818	0.958691	0.10395	0.87142	1.00773	0.144059	1.12453	0.0480448	0	0	0	1	1	1
FBtr0072040	CG30413	0.0393601	0.996486	0.093301	0.879776	1.26167	0.0674437	1.11372	0.044172	0	0	0	1	1	1
FBtr0080213	mre11	0.339258	0.77158	0.564197	0.236621	1.09861	0.056384	1.11341	0.0210065	0	0	0	1	1	1
FBtr0084308	CG6985	-0.259007	0.913457	0.637833	0.225025	0.874545	0.145351	1.11294	0.03085	0	0	0	1	1	1
FBtr0073184	CG32262	0.534093	0.476578	1.13907	0.0476146	0.868649	0.12374	1.11103	0.0228471	0	1	0	1	1	1
FBtr0084352	CG6733	1.09193	0.119182	0.459778	0.390619	0.96534	0.135634	1.10617	0.0396918	1	0	0	1	1	1
FBtr0075897	mRpL20	0.90378	0.308237	1.16864	0.106747	1.25858	0.0984213	1.10083	0.0692212	0	1	0	1	1	1
FBtr0100030	CG33985	0.0556528	0.995616	0.336627	0.575721	1.71086	0.0300006	1.09209	0.0625617	0	0	0	1	1	1
FBtr0085861	CG2187	0.42017	0.680041	-0.117215	0.82487	2.58424	0.000950153	1.08917	0.0301429	0	0	0	1	1	1
FBtr0082896	CG9616	1.90855	0.0539097	0.61086	0.41469	1.52502	0.0960998	1.07832	0.122536	1	0	0	1	1	1
FBtr0070100	pcl	-0.0689727	0.995616	-0.153391	0.795256	0.98409	0.135845	1.07385	0.0464257	0	0	0	1	1	1
FBtr0077066	CG10472	0.235298	0.857502	-0.192742	0.622159	0.75618	0.110039	1.06914	0.0127206	0	0	0	1	1	1
FBtr0078016	kraken	-0.0256566	0.996486	0.52171	0.291479	0.90731	0.120924	1.05488	0.0322701	0	0	0	1	1	1
FBtr0076837	CG8607	0.839329	0.372454	1.41025	0.0631003	1.38792	0.0760098	1.04667	0.0829288	0	1	0	1	1	1
FBtr0088685	ana2	0.0411069	0.995616	0.30498	0.524136	0.862668	0.138225	1.03906	0.034016	0	0	0	1	1	1
FBtr0087867	nemy	0.915907	0.185346	0.418006	0.423274	0.940085	0.137891	1.02916	0.0474759	0	0	0	1	1	1
FBtr0074410	Arpc3B	0.118113	0.995616	0.550991	0.327836	1.11653	0.0984213	1.00574	0.062375	0	0	0	1	1	1
FBtr0088376	CG18446	-0.243458	0.972781	-0.525833	0.432572	1.41443	0.0884792	1.00404	0.110873	0	0	0	1	1	1
FBtr0076381	CG3280	0.64319	0.379864	0.885087	0.113105	1.94742	0.00549224	1.00026	0.041367	0	1	0	1	1	1
FBtr0071985	l(2)06496	1.02475	0.182483	1.09246	0.105191	1.66211	0.0292124	0.999831	0.0743972	0	1	0	1	1	1
FBtr0074235	CG9921	-0.0430193	0.996486	0.501899	0.438569	1.14828	0.143912	0.9965	0.104063	0	0	0	1	1	1
FBtr0072731	Psf1	0.0649899	0.995616	1.69265	0.0392818	1.15227	0.144059	0.991626	0.106746	0	1	0	1	1	1
FBtr0084362	CG13833	0.810901	0.460215	1.10607	0.144793	1.25313	0.135416	0.988571	0.123588	0	1	0	1	1	1
FBtr0074824	CG17147	5.46076	1.99924e-06	-0.00755446	0.987347	0.75195	0.11341	0.987914	0.017885	1	0	0	1	1	1
FBtr0072628	LysB	2.06603	0.0239451	0.719541	0.29638	1.38658	0.0923998	0.987634	0.113272	1	0	0	1	1	1
FBtr0081331	bwa	1.22317	0.0278581	-0.0808683	0.858451	1.72608	0.00405787	0.961956	0.0256592	1	0	0	1	1	1
FBtr0079485	CG7191	-0.280057	0.823773	-0.519988	0.243838	0.879753	0.0941771	0.954943	0.0305895	0	0	0	1	1	1
FBtr0072088	CG13560	-0.0437413	0.995616	0.269324	0.596589	0.92484	0.134497	0.945563	0.0565906	0	0	0	1	1	1
FBtr0070692	CG3062	0.41534	0.681765	0.645377	0.206958	0.87772	0.134899	0.922595	0.051931	0	0	0	1	1	1
FBtr0086940	CG4866	0.299623	0.921113	0.911255	0.160655	1.0353	0.149646	0.910003	0.104781	0	0	0	1	1	1
FBtr0074860	obst-F	-0.212441	0.928563	0.0396025	0.938805	0.771854	0.143912	0.893198	0.0420096	0	0	0	1	1	1
FBtr0084320	rumi	0.54857	0.387594	1.6213	0.0057857	0.819677	0.110528	0.892915	0.0365782	0	1	0	1	1	1
FBtr0087199	CG30093	1.33835	0.0612488	-0.618455	0.270025	1.58652	0.0260901	0.883402	0.0868664	1	0	0	1	1	1
FBtr0080110	CG6443	0.468002	0.411209	1.38726	0.00675613	0.947013	0.046162	0.877481	0.0245845	0	1	0	1	1	1
FBtr0085024	Pdf	0.102432	0.995616	0.185432	0.753828	1.10042	0.102404	0.866559	0.0990917	0	0	0	1	1	1
FBtr0079807	CG3759	0.362871	0.832822	-0.938789	0.134158	1.02399	0.135416	0.85389	0.106377	0	-1	0	1	1	1
FBtr0081206	Rab9	-0.12689	0.99347	0.0122197	0.979925	0.854939	0.101527	0.850587	0.0459432	0	0	0	1	1	1
FBtr0085013	CG14237	-0.502594	0.604242	-0.0692222	0.908154	1.41479	0.035797	0.845321	0.0902903	0	0	0	1	1	1
FBtr0070809	CG15771	-0.0467815	0.995616	0.150308	0.742492	1.01578	0.0593231	0.83654	0.0491895	0	0	0	1	1	1
FBtr0084450	Hmgcr	0.683032	0.168319	0.747627	0.087137	0.875232	0.0599307	0.828887	0.03085	0	1	0	1	1	1
FBtr0082789	CG14369	-0.103597	0.995616	0.281914	0.490592	0.88906	0.0807614	0.822998	0.0454595	0	0	0	1	1	1
FBtr0080848	cni	-0.00750542	0.99897	0.22084	0.698503	1.04093	0.122813	0.818305	0.112325	0	0	0	1	1	1
FBtr0072586	CG13889	0.505464	0.556332	0.523102	0.302948	1.44631	0.0265778	0.812364	0.0856337	0	0	0	1	1	1
FBtr0074062	CG15646	0.300061	0.833673	0.653824	0.189691	0.955521	0.0944414	0.802043	0.0745117	0	0	0	1	1	1
FBtr0078057	CG13692	-0.659708	0.223167	-0.0853484	0.84674	0.724832	0.137141	0.794172	0.04662	0	0	0	1	1	1
FBtr0077212	Cyp6t1	-0.0827699	0.995616	0.193369	0.716739	0.930243	0.134497	0.793547	0.100672	0	0	0	1	1	1
FBtr0080324	CG31758	0.460214	0.565236	-0.199092	0.669727	0.916471	0.0983002	0.792559	0.0714301	0	0	0	1	1	1
FBtr0084009	rtet	0.266472	0.898837	0.540352	0.283282	1.3326	0.0352262	0.770598	0.0968167	0	0	0	1	1	1
FBtr0074102	CG32582	0.391343	0.612511	0.759856	0.109578	1.03558	0.0486034	0.766104	0.056976	0	1	0	1	1	1
FBtr0075076	CG3902	0.674796	0.228538	0.0441881	0.928092	0.757721	0.134872	0.752919	0.0631623	0	0	0	1	1	1
FBtr0071356	CG10970	0.0336051	0.996486	-0.465068	0.379085	1.6995	0.0152398	0.724809	0.135173	0	0	0	1	1	1
FBtr0088405	egr	0.419817	0.551261	-0.0971583	0.826755	0.720692	0.143743	0.711529	0.0710076	0	0	0	1	1	1
FBtr0077329	CG15459	-0.296487	0.815949	-0.118279	0.806917	0.888179	0.0984213	0.708945	0.09145	0	0	0	1	1	1
FBtr0074631	CG6891	1.10091	0.0470805	0.52528	0.230144	0.869896	0.090466	0.703003	0.078721	1	0	0	1	1	1
FBtr0074593	Aats-his	0.475306	0.47618	0.47698	0.264731	0.951153	0.0626691	0.70294	0.075978	0	0	0	1	1	1
FBtr0088406	egr	0.419029	0.540988	-0.249912	0.531406	0.782643	0.109032	0.697388	0.0719205	0	0	0	1	1	1
FBtr0084037	CG7056	-0.039847	0.995616	-0.0293575	0.950036	0.913795	0.0626691	0.691972	0.0703255	0	0	0	1	1	1
FBtr0072317	CG3570	0.745794	0.182483	1.4745	0.00956282	1.03139	0.0544364	0.687095	0.0889793	0	1	0	1	1	1
FBtr0070657	CG15579	0.919579	0.169661	1.16831	0.0552915	1.26458	0.0486034	0.679069	0.144312	0	1	0	1	1	1
FBtr0070875	CG3774	0.377229	0.678526	0.356566	0.412456	0.828076	0.118576	0.663105	0.104958	0	0	0	1	1	1
FBtr0088916	CG30492	0.323408	0.802031	0.299281	0.518997	0.829993	0.141941	0.630068	0.144188	0	0	0	1	1	1
FBtr0084053	ETHR	0.195657	0.931225	0.657431	0.14247	0.789648	0.110907	0.617235	0.105313	0	1	0	1	1	1
FBtr0080296	RpL7-like	0.0792511	0.995616	0.0352115	0.933792	0.639414	0.140421	0.493681	0.136133	0	0	0	1	1	1
FBtr0074390	CG32564	1.67724	0.0748002	2.39471	0.0118337	1.19691	0.16313	3.17457	0.00136551	1	1	1	0	1	0
FBtr0074769	CG14219	2.17926	0.0385678	2.97502	0.00608474	0.613736	0.462097	2.88265	0.00315972	1	1	1	0	1	0
FBtr0087033	CG5550	2.15609	0.0879039	1.57012	0.14079	1.26508	0.246085	2.74059	0.0111889	1	1	1	0	1	0
FBtr0077028	CG32408	1.68274	0.122026	3.16639	0.00590155	1.19354	0.21119	1.774	0.0348793	1	1	1	0	1	0
FBtr0083157	CG14872	0.909119	0.113456	1.04584	0.0509165	-0.0851544	0.886779	1.68544	0.00271995	1	1	1	0	1	0
FBtr0088212	Elp2	1.2437	0.0267643	1.76511	0.00305664	0.416543	0.352032	1.58144	0.00271995	1	1	1	0	1	0
FBtr0088213	CG12934	1.91014	0.0388829	4.86489	0.000195144	0.536463	0.464724	1.05614	0.103462	1	1	1	0	1	0
FBtr0078160	CG13694	1.12748	0.0472854	1.38355	0.0140289	0.306707	0.504995	0.997602	0.0264223	1	1	1	0	1	0
FBtr0088864	Odc2	2.53372	0.00104489	2.41355	0.000734811	0.0118474	0.98606	0.985744	0.0283692	1	1	1	0	1	0
FBtr0071864	CG13512	1.48426	0.0711482	1.74504	0.0271428	-0.21925	0.774588	0.892821	0.124322	1	1	1	0	1	0
FBtr0071789	GM130	1.54129	0.0096434	1.54385	0.00696188	0.475729	0.300815	0.690021	0.0833971	1	1	1	0	1	0
FBtr0072355	CG4563	3.36812	0.0209491	2.3761	0.0615657	-0.574196	0.621678	1.12358	0.237877	1	1	1	0	0	0
FBtr0077936	CG18131	2.08044	0.0281459	1.58269	0.0616259	-0.0751873	0.939808	0.930443	0.151027	1	1	1	0	0	0
FBtr0073474	CG32667	1.46345	0.0945549	1.30939	0.0947433	-0.481464	0.502163	0.866322	0.159192	1	1	1	0	0	0
FBtr0077935	CG18131	1.88986	0.0994668	1.69447	0.0981333	-0.387141	0.699925	0.851776	0.278969	1	1	1	0	0	0
FBtr0085023	cg6490	2.26859	0.0145904	1.15246	0.126141	1.56128	0.0599307	0.846354	0.166445	1	1	1	1	0	0
FBtr0074479	CG12990	1.76843	0.050866	1.46347	0.0732872	0.703573	0.347479	0.724891	0.241737	1	1	1	0	0	0
FBtr0087679	CG13335	2.0631	0.0472854	1.29152	0.138937	-0.276232	0.774792	0.703615	0.319886	1	1	1	0	0	0
FBtr0080117	CG17124	1.90596	0.072907	1.37806	0.129712	0.437457	0.624707	0.684114	0.347467	1	1	1	0	0	0
FBtr0074827	CG13813	3.86889	0.00417117	2.85427	0.0147921	1.367	0.194778	0.595783	0.46568	1	1	1	0	0	0
FBtr0080995	CG15142	1.0311	0.0671758	1.13529	0.033784	0.631757	0.202454	0.557263	0.155379	1	1	1	0	0	0
FBtr0073427	Vago	1.54567	0.0385881	2.1312	0.00583534	0.679284	0.273804	0.476836	0.340015	1	1	1	0	0	0
FBtr0075894	CG11253	0.998676	0.0690238	0.898409	0.0711446	0.421903	0.350268	0.471275	0.20835	1	1	1	0	0	0
FBtr0089326	cg11538	2.83679	0.0150814	1.89582	0.0609417	0.108636	0.925434	0.464201	0.550439	1	1	1	0	0	0
FBtr0075316	CG13032	5.3025	0.00676533	2.17292	0.140925	-0.267289	0.883087	0.372183	0.786543	1	1	1	0	0	0
FBtr0084235	CG5379	2.94466	0.0546345	1.89575	0.140008	1.2386	0.326439	0.273079	0.825446	1	1	1	0	0	0
FBtr0076556	CG5644	1.44838	0.0709488	1.00631	0.135874	1.11821	0.129045	0.250298	0.673784	1	1	1	1	0	0
FBtr0081346	CG10730	1.69367	0.040943	1.21832	0.0915948	0.752075	0.274146	0.228175	0.708733	1	1	1	0	0	0
FBtr0072140	CG2812	1.4093	0.0728787	2.39567	0.00445067	0.653037	0.318222	0.221031	0.708638	1	1	1	0	0	0
FBtr0083288	CG14881	1.00271	0.0759716	1.25593	0.0220101	1.07055	0.050176	0.220537	0.587296	1	1	1	1	0	0
FBtr0075511	CG17032	1.4239	0.0709488	1.09977	0.109203	-0.105504	0.896033	0.191415	0.749831	1	1	1	0	0	0
FBtr0075971	CG10654	1.52722	0.0619259	1.93382	0.0158295	0.433005	0.514623	0.180548	0.774059	1	1	1	0	0	0
FBtr0084456	Lsd-1	1.3369	0.130851	1.23434	0.110519	0.108953	0.905748	0.17852	0.799925	1	1	1	0	0	0
FBtr0084153	fit	3.18249	0.125814	3.4593	0.0679847	0.514006	0.793283	0.168997	0.925066	1	1	1	0	0	0
FBtr0084585	CG13607	2.27572	0.122125	2.14554	0.0995895	-0.52352	0.68022	0.145959	0.907309	1	1	1	0	0	0
FBtr0084455	Lsd-1	1.34623	0.121077	1.22832	0.106752	0.0440425	0.964398	0.0979548	0.894609	1	1	1	0	0	0
FBtr0080615	nimC1	3.02981	0.00129386	1.65502	0.0207163	2.13115	0.00708327	0.0649118	0.918166	1	1	1	1	0	0
FBtr0074868	CG14187	1.9249	0.130217	2.5741	0.0339373	0.170672	0.896497	0.0620526	0.955821	1	1	1	0	0	0
FBtr0070349	CG3857	1.03252	0.0332931	1.88504	0.00109955	0.582136	0.172004	0.0615093	0.877594	1	1	1	0	0	0
FBtr0072696	CG33231	1.07886	0.106171	2.14525	0.00328817	1.12624	0.0760098	0.0325548	0.956053	1	1	1	1	0	0
FBtr0074908	CG7433	1.65063	0.0162844	1.28951	0.0376216	0.112859	0.860577	0.00297054	0.995747	1	1	1	0	0	0
FBtr0073208	CG14990	1.12121	0.0738516	1.07256	0.0616259	0.0311082	0.965143	-0.0124701	0.983074	1	1	1	0	0	0
FBtr0089324	Lsp2	2.74786	0.0280914	1.6423	0.118985	-0.0661432	0.96195	-0.0167101	0.988308	1	1	1	0	0	0
FBtr0082567	CG10013	0.841001	0.134827	1.36755	0.014352	-0.00765687	0.990778	-0.0271913	0.956133	1	1	1	0	0	0
FBtr0080474	CG9377	1.60709	0.0648921	1.41728	0.0717166	0.500478	0.477702	-0.0448738	0.953037	1	1	1	0	0	0
FBtr0085991	CG30431	1.00026	0.144427	1.28003	0.0476146	-0.59204	0.300963	-0.178401	0.731094	1	1	1	0	0	0
FBtr0082659	cg5999	2.47145	0.0160937	2.44292	0.0124816	-0.225088	0.809044	-0.225507	0.76285	1	1	1	0	0	0
FBtr0076084	CG10361	1.16201	0.0498193	0.89532	0.0891735	-0.396814	0.411662	-0.228506	0.590098	1	1	1	0	0	0
FBtr0075312	CG32165	1.75703	0.00854466	1.68911	0.00730546	-0.653299	0.217761	-0.322935	0.439784	1	1	1	0	0	0
FBtr0084350	CG17110	0.92632	0.105685	1.08404	0.0464914	-0.547601	0.265617	-0.437528	0.266544	1	1	1	0	0	0
FBtr0078065	nAcRbeta-21C	1.12515	0.0885994	0.886515	0.122439	0.248961	0.66283	-0.63811	0.168969	1	1	1	0	0	0
FBtr0079241	CG13998	1.44532	0.0766559	1.04709	0.134048	-0.118805	0.888832	-0.694152	0.217074	1	1	1	0	0	0
FBtr0088663	CG8193	1.5646	0.0628337	1.44877	0.0595714	0.204279	0.795374	-0.819723	0.161539	1	1	1	0	0	0
FBtr0078064	nAcRbeta-21C	1.96537	0.0945549	1.51188	0.13362	-0.318108	0.771096	-0.847602	0.292581	1	1	1	0	0	0
FBtr0072245	CG15800	1.57507	0.0463497	1.35245	0.059262	-0.111639	0.890261	-1.1317	0.052318	1	1	1	0	-1	0
FBtr0088183	Cpr47Eg	0.105574	0.995616	-0.0638981	0.933697	-0.59744	0.39255	5.3215	5.27088e-05	0	0	0	0	1	0
FBtr0076718	CG7213	0.00646562	0.999399	5.1548	0.000144911	-0.103846	0.912618	4.66952	0.000117734	0	1	0	0	1	0
FBtr0088708	PGRP-SC1b	0.10983	0.995616	0.422479	0.62274	0.849762	0.358419	4.08434	0.000923379	0	0	0	0	1	0
FBtr0079061	Cyp28d2	0.390181	0.845594	0.152078	0.824253	0.122227	0.885807	3.90441	0.000182941	0	0	0	0	1	0
FBtr0086621	DptB	-3.23912	0.121436	-0.181153	0.923008	1.94664	0.273744	3.88261	0.0210065	-1	0	0	0	1	0
FBtr0076145	CG33268	0.160609	0.995616	-0.0383413	0.968024	0.765342	0.358419	3.86311	0.000652217	0	0	0	0	1	0
FBtr0080782	CG15253	0.207601	0.995616	0.437519	0.714767	1.05351	0.394551	3.81473	0.00518701	0	0	0	0	1	0
FBtr0088707	PGRP-SC1a	0.210849	0.995616	0.814787	0.427293	0.582595	0.605238	3.78423	0.00323671	0	0	0	0	1	0
FBtr0073883	Ste:CG33246	0.433033	0.985322	1.79219	0.212905	1.79677	0.244702	3.64926	0.0144134	0	0	0	0	1	0
FBtr0073873	Ste:CG33236	0.326546	0.995616	2.0332	0.151754	1.72949	0.242347	3.63215	0.0120746	0	0	0	0	1	0
FBtr0071891	CG30265	0.204575	0.995616	1.71175	0.193765	1.24291	0.354475	3.62078	0.0096781	0	0	0	0	1	0
FBtr0073884	CG33247	0.423601	0.987241	2.1901	0.143487	1.65705	0.275536	3.55697	0.0159931	0	1	0	0	1	0
FBtr0073874	Ste:CG33237	0.223246	0.995616	2.01048	0.183558	1.73504	0.270773	3.53596	0.0185866	0	0	0	0	1	0
FBtr0073856	Ste12DOR	0.400069	0.995423	2.14195	0.174432	1.72003	0.289639	3.53107	0.02209	0	0	0	0	1	0
FBtr0079768	Toll-4	-0.449768	0.857502	1.08628	0.174773	0.219206	0.813984	3.47387	0.00103543	0	0	0	0	1	0
FBtr0076100	CG7377	0.466172	0.904011	-0.176516	0.853108	0.731137	0.432068	3.38647	0.0025204	0	0	0	0	1	0
FBtr0070880	CG32751	0.159913	0.995616	0.918389	0.605327	0.191201	0.939127	3.38399	0.0513219	0	0	0	0	1	0
FBtr0073302	CG12607	0.529433	0.3981	0.273008	0.5047	0.426073	0.343712	3.31285	5.27088e-05	0	0	0	0	1	0
FBtr0087955	Cpr49Ad	0.122192	0.995616	0.197077	0.837842	1.18903	0.231994	3.28962	0.00297194	0	0	0	0	1	0
FBtr0081453	CheB38a	0.700102	0.738101	2.08034	0.0524681	1.16236	0.245164	3.27014	0.00315972	0	1	0	0	1	0
FBtr0082143	CG8534	1.11404	0.647602	-1.24486	0.321865	-0.585914	0.675679	3.21678	0.0159931	0	0	0	0	1	0
FBtr0073613	CG9360	-0.62293	0.625033	0.650107	0.336191	0.248755	0.755457	3.16635	0.000957619	0	0	0	0	1	0
FBtr0078172	CG6289	0.0534768	0.995616	-0.150426	0.808954	0.596835	0.333248	3.15168	0.0003462	0	0	0	0	1	0
FBtr0085616	CecC	-1.33136	0.495046	-0.113073	0.936232	1.43205	0.28043	3.10904	0.0159931	0	0	0	0	1	0
FBtr0081586	Mst84Db	0.214854	0.995616	0.55844	0.559254	0.323959	0.783378	3.08018	0.00608706	0	0	0	0	1	0
FBtr0086643	CG18609	0.187396	0.995616	-0.724555	0.352067	0.00965845	0.992764	3.0745	0.00228086	0	0	0	0	1	0
FBtr0079499	CG7214	1.10689	0.179389	-1.24549	0.087137	0.0181588	0.985472	3.03579	0.000786483	0	-1	0	0	1	0
FBtr0076064	prc	0.959138	0.771692	-0.294768	0.835296	0.269857	0.877159	3.01404	0.0260284	0	0	0	0	1	0
FBtr0082638	Hsp70Bc	1.70026	0.282861	1.51354	0.209142	1.63912	0.211918	2.98543	0.0158634	0	0	0	0	1	0
FBtr0081350	CG10659	0.0482455	0.996486	0.15323	0.872351	0.55885	0.546504	2.95797	0.00420956	0	0	0	0	1	0
FBtr0082679	Hsp70Ba	1.43364	0.41819	1.11234	0.340558	1.67647	0.207666	2.94122	0.0172568	0	0	0	0	1	0
FBtr0088808	CG8708	-0.286915	0.985322	-0.847531	0.352963	1.14556	0.260627	2.94099	0.0055802	0	0	0	0	1	0
FBtr0079761	CG9555	0.112343	0.995616	0.184531	0.810852	0.0941594	0.922403	2.89443	0.00195708	0	0	0	0	1	0
FBtr0087993	Cyp6t3	-1.01552	0.650516	0.706912	0.528994	-0.122194	0.939199	2.88905	0.0170473	0	0	0	0	1	0
FBtr0086340	CG8654	1.22398	0.44903	0.418363	0.693458	0.183003	0.895517	2.88057	0.0118949	0	0	0	0	1	0
FBtr0088809	CG8708	0.163654	0.995616	-0.101839	0.88676	0.451292	0.514165	2.8767	0.00130257	0	0	0	0	1	0
FBtr0075422	CG4753	0.142242	0.996486	-2.11099	0.327474	1.0034	0.676846	2.87058	0.143342	0	0	0	0	1	0
FBtr0073307	CG11350	-0.0977082	0.995616	-0.0918385	0.923829	0.218705	0.834446	2.82716	0.00433484	0	0	0	0	1	0
FBtr0077152	CG10630	-0.446866	0.719223	1.79757	0.0130244	-0.019412	0.982635	2.75801	0.000652217	0	1	0	0	1	0
FBtr0079500	Acp1	0.727847	0.250988	-1.82462	0.00526426	-0.448274	0.373641	2.74678	0.000268629	0	-1	0	0	1	0
FBtr0072448	CG30430	0.26538	0.972012	0.104271	0.899214	0.54603	0.483564	2.74028	0.00297388	0	0	0	0	1	0
FBtr0080783	CG15254	-1.04464	0.203067	0.846592	0.197616	-1.71177	0.0330831	2.73656	0.00135561	0	0	0	-1	1	0
FBtr0089845	CG33267	0.668064	0.397486	-0.26671	0.611382	0.307544	0.588681	2.72677	0.000515809	0	0	0	0	1	0
FBtr0076720	CG32364	-0.903791	0.603136	2.62703	0.0268528	0.42972	0.687046	2.69167	0.0105625	0	1	0	0	1	0
FBtr0100054	CG33999	0.429459	0.815949	0.96951	0.163182	0.555309	0.41851	2.6806	0.00176129	0	0	0	0	1	0
FBtr0087667	cid	-0.741151	0.628822	1.86305	0.0539065	0.683361	0.423849	2.65778	0.00511875	0	1	0	0	1	0
FBtr0082180	CG31477	-0.0296518	0.997933	0.504498	0.582054	1.37575	0.199055	2.65494	0.0102773	0	0	0	0	1	0
FBtr0081587	Mst84Dc	-0.160945	0.995616	0.118537	0.899726	0.0745648	0.95091	2.64552	0.00649997	0	0	0	0	1	0
FBtr0083586	WRNexo	-0.352482	0.683765	0.650777	0.147405	0.40603	0.361236	2.61599	0.000156871	0	1	0	0	1	0
FBtr0072868	CG13936	0.0613376	0.996486	0.85766	0.406188	0.724191	0.512003	2.60569	0.0179306	0	0	0	0	1	0
FBtr0076174	CG7557	0.0134516	0.99897	0.300593	0.803532	0.857379	0.466204	2.60387	0.0247982	0	0	0	0	1	0
FBtr0081584	Mst84Da	0.334047	0.931225	0.391905	0.571941	0.814797	0.292391	2.59739	0.00306836	0	0	0	0	1	0
FBtr0084913	CG14545	-0.234465	0.995423	-0.192245	0.826755	0.649478	0.452643	2.58565	0.00618861	0	0	0	0	1	0
FBtr0085945	CG15219	0.373516	0.995423	0.573589	0.677017	-0.751359	0.606693	2.58215	0.0503622	0	0	0	0	1	0
FBtr0082636	Hsp70Bbb	0.997029	0.683633	0.659189	0.568479	1.46985	0.260802	2.57298	0.0309928	0	0	0	0	1	0
FBtr0076701	eIF4E-3	0.103982	0.996486	1.27894	0.434091	-0.931925	0.604463	2.55387	0.100672	0	0	0	0	1	0
FBtr0081588	Mst84Dd	-0.00343687	0.999741	0.468568	0.646061	-0.0010562	0.999645	2.53718	0.0181005	0	0	0	0	1	0
FBtr0085944	CG15219	0.258847	0.995616	0.0815485	0.956794	-0.825625	0.546006	2.53444	0.044172	0	0	0	0	1	0
FBtr0071157	CG10959	-0.258665	0.869829	0.668721	0.162335	0.286375	0.547745	2.52418	0.000297767	0	0	0	0	1	0
FBtr0080807	CG31820	-0.428697	0.965322	-0.465731	0.688909	-0.212866	0.890261	2.52041	0.0304494	0	0	0	0	1	0
FBtr0080107	CG17107	-2.12889	0.0888882	1.58702	0.135874	1.46555	0.192388	2.50643	0.0159869	-1	1	0	0	1	0
FBtr0077679	Ts	-0.511607	0.490476	1.01846	0.0616259	-0.306838	0.529812	2.50151	0.0003462	0	1	0	0	1	0
FBtr0071058	CG11368	-1.01866	0.680138	-1.23691	0.306196	1.85219	0.18387	2.494	0.0369407	0	0	0	0	1	0
FBtr0083884	MtnC	0.465193	0.976335	2.25433	0.134048	0.0296371	0.987844	2.48656	0.0577786	0	1	0	0	1	0
FBtr0089292	CG8799	-0.23554	0.939826	3.49207	0.000267269	-1.38603	0.0364501	2.45563	0.000957619	0	1	0	-1	1	0
FBtr0076603	DNApol-alpha50	-0.478504	0.848485	0.0657778	0.94268	0.568103	0.493087	2.44531	0.00666347	0	0	0	0	1	0
FBtr0087954	CG8834	0.187573	0.976335	-0.158432	0.785254	0.209358	0.740198	2.43343	0.00123043	0	0	0	0	1	0
FBtr0084810	to	0.388846	0.843894	-0.515546	0.407938	0.462922	0.485979	2.43083	0.00247937	0	0	0	0	1	0
FBtr0084473	CG31468	0.0802238	0.995616	0.695414	0.39677	0.259557	0.797194	2.42594	0.00897194	0	0	0	0	1	0
FBtr0087522	CG18327	0.740972	0.520477	1.37375	0.0897852	1.06303	0.191056	2.4033	0.00412347	0	1	0	0	1	0
FBtr0076729	RecQ4	-0.368951	0.587312	0.580792	0.154585	0.0103369	0.98606	2.39711	0.000156871	0	0	0	0	1	0
FBtr0074582	CG15057	-0.400196	0.995616	-0.34553	0.845318	1.93337	0.282834	2.39101	0.112325	0	0	0	0	1	0
FBtr0077061	Lcp65Ag3	0.464318	0.836603	0.0933809	0.912104	-1.96856	0.035797	2.38892	0.00545945	0	0	0	-1	1	0
FBtr0086998	CG30457	-0.285957	0.949999	0.10061	0.892705	-0.0378728	0.969457	2.367	0.00383878	0	0	0	0	1	0
FBtr0073352	CG13705	-0.063085	0.996486	0.252579	0.784554	-1.31366	0.190611	2.36051	0.0124605	0	0	0	0	1	0
FBtr0071892	CG12490	-1.8741	0.24953	-0.321926	0.804635	1.11633	0.386241	2.35364	0.0464257	0	0	0	0	1	0
FBtr0085599	ocn	-0.106352	0.996486	0.123564	0.943757	-0.662908	0.695931	2.34213	0.0956073	0	0	0	0	1	0
FBtr0083617	CG7208	-0.151044	0.995616	0.634159	0.359113	0.102771	0.912618	2.33333	0.00449282	0	0	0	0	1	0
FBtr0087996	CG13170	0.0377874	0.996486	0.226022	0.727368	0.166626	0.831229	2.33321	0.0029618	0	0	0	0	1	0
FBtr0088758	LvpL	-0.435053	0.956957	-0.936796	0.39007	1.6865	0.187143	2.30431	0.0359872	0	0	0	0	1	0
FBtr0078613	CG15597	-0.0772702	0.995616	0.132074	0.810583	0.518798	0.343416	2.30286	0.00116085	0	0	0	0	1	0
FBtr0087306	CG30085	-0.808943	0.178319	0.56789	0.230206	-0.380179	0.431719	2.30285	0.000597226	0	0	0	0	1	0
FBtr0081309	Victoria	1.14198	0.468793	0.498814	0.613681	1.50424	0.19151	2.28363	0.0260348	0	0	0	0	1	0
FBtr0087307	Gpo-1	0.772206	0.462667	-0.0362487	0.964488	0.270541	0.722865	2.27956	0.00420956	0	0	0	0	1	0
FBtr0073172	CG12766	-1.43937	0.308673	-1.69941	0.129829	1.00997	0.352032	2.27895	0.0281671	0	-1	0	0	1	0
FBtr0081406	CG17470	2.6687	0.00924095	-0.356894	0.619231	0.288643	0.728138	2.26071	0.00656691	1	0	0	0	1	0
FBtr0084259	CG7046	-0.228163	0.951631	0.038048	0.953818	-0.343526	0.565864	2.22502	0.00216894	0	0	0	0	1	0
FBtr0073806	BthD	-0.279352	0.950163	0.681096	0.311372	0.361626	0.615988	2.21739	0.00484925	0	0	0	0	1	0
FBtr0082722	yellow-f2	-0.245448	0.979822	0.292332	0.698409	0.866598	0.287786	2.20853	0.00847017	0	0	0	0	1	0
FBtr0077058	Lcp65Ag1	0.653973	0.687555	0.274494	0.734448	-1.60984	0.0879923	2.20707	0.0104465	0	0	0	-1	1	0
FBtr0071403	CG3106	0.498527	0.815949	-0.581072	0.431885	0.0455843	0.966987	2.2035	0.00904912	0	0	0	0	1	0
FBtr0082377	Ugt86Dg	-0.389022	0.933547	0.202679	0.823509	0.867303	0.33431	2.20081	0.0150001	0	0	0	0	1	0
FBtr0070863	CG6048	-0.263027	0.956957	-0.681742	0.306196	1.1044	0.158808	2.187	0.00495233	0	0	0	0	1	0
FBtr0070564	CG14419	-0.919748	0.768231	0.312895	0.815339	-0.140748	0.934664	2.18408	0.0665382	0	0	0	0	1	0
FBtr0084358	CG17119	0.0417645	0.997933	-0.0550949	0.97618	0.855329	0.599894	2.17955	0.117647	0	0	0	0	1	0
FBtr0083707	dnk	-0.529036	0.536617	0.130595	0.812761	0.299639	0.5861	2.17598	0.00154451	0	0	0	0	1	0
FBtr0081870	CG31454	0.162155	0.995616	0.611605	0.531848	0.336796	0.780005	2.17201	0.0313026	0	0	0	0	1	0
FBtr0088248	Lsm10	-0.706098	0.622299	1.06651	0.185069	0.75725	0.353878	2.16475	0.0104634	0	0	0	0	1	0
FBtr0088959	Orc1	-0.731193	0.48457	0.534362	0.40629	-0.110021	0.898934	2.15967	0.00492014	0	0	0	0	1	0
FBtr0079766	CG13102	0.128342	0.995616	1.44907	0.163218	1.16363	0.275889	2.15527	0.0296648	0	0	0	0	1	0
FBtr0078090	CG13690	-0.770882	0.635911	0.20379	0.824253	0.208238	0.846823	2.15386	0.0167567	0	0	0	0	1	0
FBtr0082379	Ugt86Dd	-0.485915	0.810244	0.991303	0.191697	-0.258961	0.76355	2.1472	0.00847492	0	0	0	0	1	0
FBtr0086482	CG15127	0.159905	0.995616	2.25808	0.113844	1.64827	0.245121	2.14369	0.0751231	0	1	0	0	1	0
FBtr0086148	Fmo-2	0.462488	0.742402	-0.0301183	0.967323	0.402724	0.529169	2.14124	0.00344508	0	0	0	0	1	0
FBtr0074053	CG8128	0.429449	0.842574	0.405262	0.553005	0.15578	0.860818	2.14056	0.00698822	0	0	0	0	1	0
FBtr0081229	CG17567	-0.197286	0.995616	0.399431	0.785121	-0.828254	0.57195	2.13964	0.0953002	0	0	0	0	1	0
FBtr0077032	CG32407	0.259007	0.909362	0.444694	0.374955	0.307469	0.567937	2.13905	0.00154451	0	0	0	0	1	0
FBtr0085598	janB	0.0366078	0.995616	0.151837	0.743722	0.600111	0.228477	2.13477	0.000786483	0	0	0	0	1	0
FBtr0080922	CG31781	0.272312	0.935518	-0.565965	0.33875	0.784479	0.236799	2.1306	0.00331619	0	0	0	0	1	0
FBtr0072237	shu	-0.129604	0.995616	0.337286	0.680443	0.786386	0.361706	2.12767	0.0145372	0	0	0	0	1	0
FBtr0088656	CG13748	-0.681873	0.797217	-0.659433	0.48907	0.383595	0.732989	2.12551	0.0315418	0	0	0	0	1	0
FBtr0083618	CG7208	-0.154723	0.978951	0.681144	0.166099	-0.103586	0.860577	2.11724	0.00104834	0	0	0	0	1	0
FBtr0088046	RnrS	-0.601009	0.441399	0.0992706	0.856829	-0.316132	0.560997	2.10337	0.00174685	0	0	0	0	1	0
FBtr0077081	Pole2	-0.651581	0.170768	0.788366	0.0665918	0.18019	0.654305	2.09598	0.000281769	0	1	0	0	1	0
FBtr0085056	TwdlL	0.103818	0.995616	0.222313	0.825993	0.973354	0.333057	2.08867	0.0296648	0	0	0	0	1	0
FBtr0072678	msd1	-0.705528	0.635911	1.03427	0.204382	1.00866	0.245121	2.07672	0.0136967	0	0	0	0	1	0
FBtr0081095	CG10336	-0.566465	0.454061	0.375539	0.430693	0.275658	0.597414	2.06157	0.00154484	0	0	0	0	1	0
FBtr0077025	CG5568	-0.0542292	0.996486	-0.740404	0.377319	0.701236	0.43112	2.06127	0.0194683	0	0	0	0	1	0
FBtr0083156	CG14872	-0.61129	0.931604	0.164273	0.912239	0.0953148	0.960228	2.06092	0.0921752	0	0	0	0	1	0
FBtr0082436	CG18765	1.13905	0.590109	-0.271788	0.831022	1.27574	0.317736	2.05243	0.0682895	0	0	0	0	1	0
FBtr0083402	CG31265	0.452787	0.879535	0.66635	0.399352	1.0466	0.239868	2.04938	0.0159931	0	0	0	0	1	0
FBtr0079966	CG13135	0.219883	0.979589	0.615362	0.348747	-0.569454	0.413846	2.04156	0.00672885	0	0	0	0	1	0
FBtr0073445	CG15200	-0.123989	0.995616	0.211064	0.873829	0.386758	0.793758	2.03318	0.0769897	0	0	0	0	1	0
FBtr0086329	CG8517	-0.0443096	0.997748	0.162276	0.916358	-0.719186	0.625839	2.03276	0.104585	0	0	0	0	1	0
FBtr0071156	CG15336	0.417275	0.865721	0.415297	0.553694	0.811383	0.297438	2.0318	0.0103565	0	0	0	0	1	0
FBtr0075012	pip	-0.0400561	0.996486	0.120181	0.872229	-0.107199	0.906764	2.03058	0.00831005	0	0	0	0	1	0
FBtr0079760	CG18662	-0.0439631	0.996486	0.158348	0.87473	0.643752	0.506437	2.02804	0.0299776	0	0	0	0	1	0
FBtr0088482	Orc6	-0.415579	0.676326	0.506749	0.300939	0.480539	0.353471	2.02752	0.0016261	0	0	0	0	1	0
FBtr0087789	sug	1.85421	0.324321	2.53703	0.0981333	0.684208	0.639937	2.02698	0.101706	0	1	0	0	1	0
FBtr0086665	IM3	-0.39994	0.995423	0.192588	0.908154	1.16721	0.455365	2.02121	0.134169	0	0	0	0	1	0
FBtr0089584	CG7730	-0.805518	0.356286	0.381817	0.515606	0.390074	0.542653	2.00818	0.00472335	0	0	0	0	1	0
FBtr0079925	Cyp4e3	0.869875	0.31885	0.129808	0.846542	0.966271	0.181442	2.00801	0.00545715	0	0	0	0	1	0
FBtr0076548	CG5194	-0.338841	0.948212	-0.135032	0.876988	0.641992	0.445272	2.00771	0.0170705	0	0	0	0	1	0
FBtr0088448	CG1441	0.193933	0.995616	0.459541	0.602063	0.324738	0.757549	2.00762	0.0280113	0	0	0	0	1	0
FBtr0077997	CG4375	0.00317276	0.999741	0.421476	0.428823	0.17215	0.795153	2.00757	0.00302278	0	0	0	0	1	0
FBtr0077323	CG15456	0.56284	0.89317	2.28869	0.0609417	1.64759	0.170104	2.00591	0.045988	0	1	0	0	1	0
FBtr0077541	cutlet	0.025919	0.996486	0.229924	0.728737	0.880085	0.222866	2.00542	0.00649997	0	0	0	0	1	0
FBtr0077182	CG15213	0.949471	0.836252	0.491451	0.757656	1.31006	0.41235	1.99987	0.145321	0	0	0	0	1	0
FBtr0088778	sut2	-0.13873	0.995616	-0.409851	0.452703	0.918979	0.163308	1.99386	0.00344494	0	0	0	0	1	0
FBtr0088112	Cpr47Eb	0.569253	0.48457	0.498263	0.325543	0.370532	0.487045	1.97661	0.00237664	0	0	0	0	1	0
FBtr0078802	hd	-0.816981	0.22567	0.587484	0.260421	0.340473	0.529812	1.97307	0.00245796	0	0	0	0	1	0
FBtr0075011	pip	-0.290056	0.900183	-0.910842	0.129711	-0.197809	0.757809	1.96514	0.00317129	0	-1	0	0	1	0
FBtr0088204	CG13230	-0.487005	0.916751	0.666187	0.480944	-0.101434	0.940448	1.95681	0.0411622	0	0	0	0	1	0
FBtr0079767	CG12439	0.359092	0.706622	0.630932	0.176045	0.157427	0.763304	1.95471	0.00125339	0	0	0	0	1	0
FBtr0070027	CG9576	-0.717746	0.263511	0.412263	0.382818	0.182341	0.742181	1.95068	0.0018563	0	0	0	0	1	0
FBtr0086214	CG13422	0.127666	0.995616	0.683188	0.543282	1.29919	0.297569	1.94435	0.0734497	0	0	0	0	1	0
FBtr0071967	CG30192	-0.0938768	0.995616	0.490662	0.573544	0.129206	0.914684	1.93653	0.0309928	0	0	0	0	1	0
FBtr0076894	CG14820	0.677832	0.704621	-0.0250382	0.979196	0.601799	0.489186	1.92621	0.0244527	0	0	0	0	1	0
FBtr0081056	CG31788	0.31587	0.995616	0.370183	0.785867	-0.587369	0.680415	1.92472	0.104285	0	0	0	0	1	0
FBtr0081351	CG12617	0.0172289	0.997933	0.297697	0.605694	-0.296445	0.642056	1.92131	0.00497052	0	0	0	0	1	0
FBtr0078241	DNApol-alpha60	-0.621038	0.285253	0.680292	0.140317	-0.180335	0.707309	1.91367	0.00116085	0	1	0	0	1	0
FBtr0073039	CG14958	0.319966	0.926159	0.333675	0.611612	0.939554	0.21119	1.90964	0.0096781	0	0	0	0	1	0
FBtr0070762	Mcm3	-1.11796	0.0888136	0.738941	0.173741	-0.242637	0.671292	1.90468	0.00292166	-1	0	0	0	1	0
FBtr0075839	Nplp2	0.612409	0.397704	0.298589	0.529568	-0.32078	0.533703	1.89939	0.00232769	0	0	0	0	1	0
FBtr0084975	Sld5	0.0598839	0.995616	1.08889	0.147545	0.50755	0.490261	1.8903	0.0128553	0	1	0	0	1	0
FBtr0080681	Mst35Bb	0.754525	0.810892	0.851018	0.439413	-0.174963	0.908007	1.88918	0.0761209	0	0	0	0	1	0
FBtr0083183	spn-E	-0.343208	0.815949	0.284629	0.574563	0.150124	0.814337	1.87493	0.00315972	0	0	0	0	1	0
FBtr0071718	CG9284	0.408963	0.904493	0.369134	0.632875	-0.215086	0.823039	1.87388	0.0207032	0	0	0	0	1	0
FBtr0074730	CG14205	2.018	0.287532	2.75543	0.0858846	1.15291	0.428904	1.87096	0.136835	0	1	0	0	1	0
FBtr0079080	CG14022	-1.61618	0.168319	-0.83251	0.350661	-0.16385	0.891458	1.86425	0.0368259	0	0	0	0	1	0
FBtr0087606	CG13350	-0.617836	0.503466	0.402775	0.466037	-0.22433	0.730873	1.84879	0.00524843	0	0	0	0	1	0
FBtr0071616	CG9752	-0.0746954	0.995616	0.265241	0.705522	0.705883	0.335147	1.84034	0.0132597	0	0	0	0	1	0
FBtr0084853	CG10553	0.373512	0.917314	-0.562512	0.441132	0.25791	0.773965	1.83894	0.0188156	0	0	0	0	1	0
FBtr0080251	CG14926	0.0862014	0.996486	0.507601	0.724259	-0.69242	0.65342	1.83696	0.147463	0	0	0	0	1	0
FBtr0087406	CG12853	0.527265	0.771291	0.886109	0.231272	0.49249	0.516881	1.83123	0.0162424	0	0	0	0	1	0
FBtr0084113	CG15497	-0.177297	0.985322	0.817963	0.167546	0.406593	0.488038	1.83071	0.00511875	0	0	0	0	1	0
FBtr0083678	CG7720	0.303426	0.944486	0.664976	0.340139	0.377604	0.617393	1.82951	0.0149946	0	0	0	0	1	0
FBtr0077022	Cpr65Ax2	0.299444	0.97914	0.493157	0.574563	-0.230007	0.837926	1.82471	0.0400486	0	0	0	0	1	0
FBtr0073473	CG15199	1.60204	0.211116	2.9633	0.0166589	-0.286097	0.812335	1.8241	0.0530235	0	1	0	0	1	0
FBtr0079387	CG11322	-0.265634	0.962688	-0.189608	0.80067	0.423816	0.568741	1.81845	0.0151324	0	0	0	0	1	0
FBtr0078959	CG9780	-0.120074	0.995616	-0.196003	0.824253	-0.235581	0.816437	1.8151	0.0296648	0	0	0	0	1	0
FBtr0085470	CG31041	1.04341	0.620997	-0.190403	0.876988	1.30696	0.289639	1.81461	0.086596	0	0	0	0	1	0
FBtr0081839	CG18193	-0.0439027	0.995616	0.410116	0.432572	0.132774	0.844145	1.80595	0.00438459	0	0	0	0	1	0
FBtr0081790	CG7910	0.200518	0.946905	-0.313984	0.490662	0.470542	0.348476	1.80587	0.00245796	0	0	0	0	1	0
FBtr0085328	CG14529	-0.247743	0.942474	0.086708	0.887334	0.698987	0.26066	1.79995	0.00556142	0	0	0	0	1	0
FBtr0085025	CG6503	0.188216	0.995616	0.0175146	0.988403	1.55036	0.182463	1.79104	0.0614776	0	0	0	0	1	0
FBtr0079380	CG17376	-0.238643	0.995616	-0.243831	0.843483	-0.523168	0.680026	1.78791	0.092407	0	0	0	0	1	0
FBtr0078052	CG33127	0.4571	0.631872	0.0909494	0.868933	0.603541	0.273804	1.7863	0.00344494	0	0	0	0	1	0
FBtr0089741	dj	-0.378377	0.994604	0.158403	0.915802	-1.0328	0.455698	1.78033	0.136102	0	0	0	0	1	0
FBtr0087766	AQP	0.922653	0.454752	0.350726	0.660044	1.21442	0.187143	1.77958	0.0282978	0	0	0	0	1	0
FBtr0074025	CG32588	0.135818	0.995616	0.300694	0.761935	0.219827	0.853285	1.77674	0.0513102	0	0	0	0	1	0
FBtr0071717	CG9284	0.23682	0.977513	0.216145	0.76989	-0.562371	0.445297	1.77478	0.016515	0	0	0	0	1	0
FBtr0084258	CG7045	-0.39382	0.943939	0.207203	0.832035	-0.418942	0.67842	1.77313	0.0453677	0	0	0	0	1	0
FBtr0070871	CG5928	1.31047	0.0711482	0.632719	0.268682	0.557268	0.352613	1.7683	0.00617187	1	0	0	0	1	0
FBtr0074867	CG7365	0.697066	0.530097	0.827666	0.231272	0.69082	0.334079	1.76462	0.0145372	0	0	0	0	1	0
FBtr0081094	CG10336	-0.950833	0.69906	-0.379444	0.752624	0.885309	0.462097	1.75815	0.100087	0	0	0	0	1	0
FBtr0073535	CG15220	-0.507106	0.882639	-0.135458	0.89116	1.03457	0.29401	1.75472	0.0464257	0	0	0	0	1	0
FBtr0086808	CG10911	-0.0838726	0.995616	-0.549996	0.285221	0.621564	0.268098	1.74975	0.00402079	0	0	0	0	1	0
FBtr0077691	CG3119	0.788137	0.643932	-1.6452	0.102618	1.03418	0.286833	1.74842	0.0440267	0	-1	0	0	1	0
FBtr0083859	CG4562	0.552546	0.865721	0.287327	0.775417	-0.0195832	0.988214	1.74803	0.0555587	0	0	0	0	1	0
FBtr0082884	Mst87F	0.514942	0.85789	0.587732	0.486131	1.35544	0.177187	1.74765	0.0409764	0	0	0	0	1	0
FBtr0070182	CDC45L	-0.335141	0.71395	0.692096	0.130553	0.193971	0.675253	1.73725	0.00160414	0	1	0	0	1	0
FBtr0078240	Toll-9	0.2926	0.931225	0.792687	0.22007	0.0690103	0.936129	1.73495	0.011243	0	0	0	0	1	0
FBtr0077419	CG15631	-0.0740695	0.995616	0.211097	0.82452	-0.107875	0.928859	1.73471	0.04575	0	0	0	0	1	0
FBtr0078008	Nnf1b	-0.448522	0.858718	0.517601	0.483001	0.832816	0.308444	1.7336	0.0260348	0	0	0	0	1	0
FBtr0075606	CG12355	0.0190935	0.998597	-1.21854	0.232896	0.95775	0.36439	1.73202	0.0674555	0	0	0	0	1	0
FBtr0078645	CG14676	0.176128	0.995423	0.486399	0.442901	-0.345113	0.624707	1.73109	0.0134792	0	0	0	0	1	0
FBtr0071890	CG30272	1.12061	0.638026	1.25341	0.315875	0.183243	0.912933	1.73095	0.127797	0	0	0	0	1	0
FBtr0085461	CG7593	-0.334485	0.909362	0.322785	0.616818	0.872	0.231994	1.73089	0.0138193	0	0	0	0	1	0
FBtr0073809	CG11164	-0.935065	0.072907	0.263675	0.501964	0.129655	0.791914	1.72512	0.00150716	-1	0	0	0	1	0
FBtr0077545	CG3604	-0.654739	0.701565	0.372848	0.636379	0.906347	0.29486	1.72309	0.0313026	0	0	0	0	1	0
FBtr0081548	Rtnl2	-0.140745	0.995616	-0.0146769	0.989594	-0.319744	0.771722	1.7216	0.0528806	0	0	0	0	1	0
FBtr0085406	CG14508	0.217258	0.979822	0.903632	0.189437	0.318345	0.662127	1.71243	0.0150001	0	0	0	0	1	0
FBtr0076591	CG5804	0.587009	0.858646	-0.779497	0.421866	0.314287	0.794282	1.7123	0.0692212	0	0	0	0	1	0
FBtr0082111	CG9396	0.125485	0.995616	-0.117706	0.901063	1.10102	0.244974	1.71185	0.0413105	0	0	0	0	1	0
FBtr0088795	CG30369	-0.0708478	0.995616	0.199054	0.640199	0.448819	0.326367	1.70898	0.00211502	0	0	0	0	1	0
FBtr0088380	CG30008	0.024822	0.996486	-0.249404	0.634461	-0.088798	0.899075	1.70648	0.00541	0	0	0	0	1	0
FBtr0081602	CG14605	0.315111	0.972012	0.0714492	0.94436	-0.175728	0.8807	1.70147	0.0472479	0	0	0	0	1	0
FBtr0070879	vanin-like	0.869196	0.56586	0.807314	0.352963	-0.210219	0.849641	1.69419	0.046837	0	0	0	0	1	0
FBtr0070792	CG3239	0.877811	0.150498	0.680831	0.170584	0.0794128	0.89807	1.68811	0.00323671	0	0	0	0	1	0
FBtr0076775	Pdp1	0.430083	0.861395	-1.1857	0.136636	0.847972	0.288834	1.68544	0.0252574	0	-1	0	0	1	0
FBtr0074363	spheroide	0.265008	0.994356	0.719803	0.423274	0.569987	0.561458	1.68402	0.0562501	0	0	0	0	1	0
FBtr0079207	CG31639	-0.0441256	0.99666	0.516746	0.646061	-0.482351	0.704426	1.67258	0.106787	0	0	0	0	1	0
FBtr0086307	mus209	-0.203829	0.97581	0.308824	0.59497	0.370973	0.554826	1.67099	0.0103762	0	0	0	0	1	0
FBtr0077894	c-cup	-0.997999	0.491647	-0.764987	0.390669	-0.121651	0.920255	1.66989	0.054439	0	0	0	0	1	0
FBtr0085119	DNApol-alpha73	-0.459461	0.413491	0.864479	0.0522707	-0.0455048	0.928836	1.66868	0.00119653	0	1	0	0	1	0
FBtr0075286	CG14057	0.00624536	0.999741	1.0789	0.277052	1.61486	0.161981	1.66693	0.0724546	0	0	0	0	1	0
FBtr0070189	CG3706	0.101519	0.995616	0.903096	0.313213	0.699485	0.456236	1.66676	0.0528908	0	0	0	0	1	0
FBtr0076689	mus301	-0.602036	0.299701	0.261642	0.523652	-0.363242	0.41235	1.66347	0.00220335	0	0	0	0	1	0
FBtr0082144	eloF	0.168574	0.995616	-0.472312	0.447543	0.270494	0.70754	1.65205	0.0155579	0	0	0	0	1	0
FBtr0081376	CG17571	-0.995865	0.467859	0.0364563	0.973522	1.01894	0.284589	1.64947	0.0503622	0	0	0	0	1	0
FBtr0077657	v(2)k05816	0.0549702	0.996486	0.592856	0.407938	-0.330352	0.683834	1.6487	0.0271318	0	0	0	0	1	0
FBtr0088660	CG13747	0.0882089	0.995616	0.23088	0.66152	0.07411	0.91745	1.6471	0.00635365	0	0	0	0	1	0
FBtr0077039	CG6462	0.162286	0.995616	0.416205	0.631746	0.677747	0.459566	1.64515	0.0516661	0	0	0	0	1	0
FBtr0078642	CG1213	0.102237	0.995616	-0.699854	0.325543	0.657999	0.384409	1.64389	0.0251362	0	0	0	0	1	0
FBtr0086033	CG7881	0.208305	0.995616	0.417062	0.597136	-0.0283818	0.981993	1.64259	0.0390899	0	0	0	0	1	0
FBtr0079526	CG14537	0.0814302	0.995616	0.352151	0.452598	0.596792	0.263144	1.63842	0.00420956	0	0	0	0	1	0
FBtr0073846	CG12177	-0.48076	0.832951	-0.0364071	0.96888	0.0894818	0.930788	1.6376	0.0324307	0	0	0	0	1	0
FBtr0085055	TwdlL	0.0116401	0.99897	0.189814	0.842293	0.892922	0.343194	1.63578	0.0538488	0	0	0	0	1	0
FBtr0071059	CG32726	-0.690028	0.797217	-0.230377	0.82815	1.58101	0.170487	1.63018	0.080414	0	0	0	0	1	0
FBtr0073839	CG32625	-0.354083	0.922973	1.19192	0.134149	0.979174	0.230097	1.63012	0.0282721	0	1	0	0	1	0
FBtr0081601	CG14605	0.172615	0.995616	0.0700137	0.937654	-0.121795	0.905748	1.62954	0.0338846	0	0	0	0	1	0
FBtr0081600	CG14605	0.209948	0.995423	0.409518	0.591315	-0.0920895	0.930295	1.62929	0.0353364	0	0	0	0	1	0
FBtr0081257	CG13077	-0.263324	0.98765	-0.186802	0.841688	0.924438	0.319777	1.62579	0.051433	0	0	0	0	1	0
FBtr0082866	Orc2	-0.748683	0.261475	0.156288	0.764775	0.380837	0.464169	1.62571	0.00511875	0	0	0	0	1	0
FBtr0080145	CG14072	-0.309426	0.952065	0.555228	0.456589	0.592558	0.461369	1.62427	0.0340789	0	0	0	0	1	0
FBtr0073286	CG32251	-0.345957	0.757209	0.258742	0.565973	-0.258075	0.60134	1.62117	0.00357376	0	0	0	0	1	0
FBtr0087906	CG30049	-0.939542	0.15075	-1.04351	0.0740566	-0.102722	0.8777	1.61988	0.0054638	0	-1	0	0	1	0
FBtr0081701	sowi	0.0604948	0.995616	0.531678	0.456642	-0.145022	0.882072	1.61986	0.029931	0	0	0	0	1	0
FBtr0071154	CG2120	0.325775	0.943939	0.547239	0.453066	0.715411	0.369755	1.6158	0.0323513	0	0	0	0	1	0
FBtr0073347	CG13711	1.34582	0.152801	1.64868	0.0553222	1.06278	0.199593	1.6154	0.0286767	0	1	0	0	1	0
FBtr0070734	CG2871	-0.0848989	0.995616	0.220666	0.691386	0.23302	0.706047	1.61253	0.00866797	0	0	0	0	1	0
FBtr0074321	CG4653	0.310031	0.968266	0.519028	0.531244	0.491026	0.589142	1.61246	0.049986	0	0	0	0	1	0
FBtr0088106	CG13228	-0.187372	0.995616	0.884717	0.34121	1.47902	0.172606	1.61169	0.0697021	0	0	0	0	1	0
FBtr0088189	Cpr47Ec	1.66836	0.0267643	0.416441	0.449029	-0.344224	0.567609	1.60839	0.0102199	1	0	0	0	1	0
FBtr0076380	CG3306	0.231068	0.972303	-1.0102	0.147405	0.439818	0.522323	1.60803	0.0182501	0	-1	0	0	1	0
FBtr0087907	CG30043	0.310986	0.951631	-0.481929	0.519561	0.335667	0.69716	1.60576	0.035641	0	0	0	0	1	0
FBtr0079662	CG31898	-1.72486	0.257502	0.0084385	0.994468	0.230251	0.878765	1.60475	0.121787	0	0	0	0	1	0
FBtr0070310	CG14803	-0.412961	0.59933	0.54676	0.222641	-0.0883103	0.87811	1.60446	0.00297194	0	0	0	0	1	0
FBtr0077506	CG15423	-0.246939	0.995616	0.832694	0.464456	1.26517	0.316273	1.60227	0.132155	0	0	0	0	1	0
FBtr0073142	CG32267	-0.363531	0.986967	-0.956398	0.41094	1.14283	0.363536	1.59923	0.136846	0	0	0	0	1	0
FBtr0087797	CG13323	-0.968424	0.260067	-0.683051	0.291479	0.324346	0.644746	1.59845	0.0175973	0	0	0	0	1	0
FBtr0077059	Lcp65Ag2	0.231864	0.995616	0.171658	0.867163	-1.82417	0.104445	1.59801	0.0730382	0	0	0	-1	1	0
FBtr0079208	CG31639	0.0519848	0.996486	0.531803	0.605755	-0.513702	0.654769	1.5949	0.0996501	0	0	0	0	1	0
FBtr0072599	CG13898	0.0978314	0.995616	0.221393	0.742339	-0.194039	0.807227	1.59442	0.0182584	0	0	0	0	1	0
FBtr0076704	CG33274	-0.757991	0.551261	1.53946	0.0762607	-0.662715	0.402235	1.59321	0.0335346	0	1	0	0	1	0
FBtr0079718	CG13394	0.300053	0.972012	0.421942	0.610542	-0.389243	0.676239	1.58981	0.0503622	0	0	0	0	1	0
FBtr0079455	Pbprp5	0.0962345	0.995616	-0.578516	0.439413	0.550535	0.493723	1.58262	0.0376474	0	0	0	0	1	0
FBtr0086480	Obp56b	0.0482049	0.996486	0.348044	0.571554	0.910233	0.204768	1.57911	0.0171035	0	0	0	0	1	0
FBtr0082962	His4r	0.309849	0.965269	-0.0518697	0.957454	1.15475	0.216001	1.57859	0.0497257	0	0	0	0	1	0
FBtr0081553	alpha-Est8	0.334203	0.835468	-0.600848	0.267842	0.815892	0.186576	1.57713	0.00847017	0	0	0	0	1	0
FBtr0071927	CG30196	-0.376256	0.934923	0.227927	0.794577	0.736256	0.396564	1.57646	0.0480646	0	0	0	0	1	0
FBtr0084904	And	0.203793	0.959787	0.439972	0.39547	-0.0144348	0.98606	1.57637	0.00777524	0	0	0	0	1	0
FBtr0074947	asf1	-0.549182	0.739772	-0.275057	0.703561	0.398907	0.599904	1.56838	0.0296648	0	0	0	0	1	0
FBtr0078960	CG9780	-0.170957	0.995423	-0.34193	0.571464	-0.201875	0.786836	1.56253	0.0166574	0	0	0	0	1	0
FBtr0079800	Eaat1	0.580663	0.552876	0.0583247	0.93079	0.428666	0.478625	1.56142	0.0126057	0	0	0	0	1	0
FBtr0084281	CG5278	0.585408	0.591352	0.460341	0.439413	0.632684	0.329406	1.56065	0.0160415	0	0	0	0	1	0
FBtr0076963	eIF4E-4	-0.219245	0.995423	0.24382	0.769121	-0.237483	0.806679	1.5582	0.0436759	0	0	0	0	1	0
FBtr0085315	CG10000	-0.637536	0.781529	1.92318	0.0661114	0.909481	0.335864	1.55741	0.0657076	0	1	0	0	1	0
FBtr0082781	CG8476	0.755369	0.410208	0.906346	0.163218	0.0324311	0.971008	1.55634	0.0160806	0	0	0	0	1	0
FBtr0088165	kappaTry	0.205054	0.995616	-1.45043	0.221713	0.402997	0.768192	1.55466	0.135173	0	0	0	0	1	0
FBtr0073447	CG15198	0.14998	0.995616	-0.0673031	0.947815	0.0685119	0.957223	1.55207	0.064441	0	0	0	0	1	0
FBtr0083417	CG17475	0.758625	0.31885	0.640055	0.250564	0.00627167	0.993025	1.54822	0.0102199	0	0	0	0	1	0
FBtr0076918	CG8620	-0.0837496	0.995616	0.763097	0.274165	0.953725	0.217417	1.54082	0.0281671	0	0	0	0	1	0
FBtr0080960	CG32832	-0.0565381	0.996486	0.465423	0.568909	0.0551785	0.96427	1.53701	0.0554404	0	0	0	0	1	0
FBtr0077256	CG14579	0.290222	0.994536	0.263824	0.807893	-0.0931035	0.94851	1.53531	0.100889	0	0	0	0	1	0
FBtr0076925	CG8629	-0.0244329	0.996486	0.0409735	0.950574	0.52571	0.381561	1.5332	0.0127206	0	0	0	0	1	0
FBtr0088023	CG30039	0.0157705	0.99897	0.259971	0.80249	-0.698423	0.491532	1.53209	0.0905689	0	0	0	0	1	0
FBtr0078980	CG9766	-0.814239	0.206169	-0.294691	0.541114	-0.292571	0.578237	1.53106	0.00659668	0	0	0	0	1	0
FBtr0084115	DNApolalpha180	-0.201937	0.919071	0.706243	0.120565	0.0428454	0.939699	1.53051	0.00278591	0	1	0	0	1	0
FBtr0070480	CG2681	0.0222483	0.998597	0.730989	0.513021	0.220281	0.885807	1.53	0.141144	0	0	0	0	1	0
FBtr0071777	Oatp58Dc	0.104296	0.995616	0.440584	0.316374	0.223361	0.642498	1.52813	0.00379564	0	0	0	0	1	0
FBtr0086905	CG14482	0.68392	0.805412	0.296112	0.783361	0.949638	0.377404	1.52563	0.103399	0	0	0	0	1	0
FBtr0082737	CG8630	0.960498	0.565447	-0.799401	0.402955	0.481568	0.65082	1.52466	0.09145	0	0	0	0	1	0
FBtr0071399	CG32696	0.280369	0.95082	1.22195	0.111477	0.774234	0.296981	1.52175	0.0286767	0	1	0	0	1	0
FBtr0085671	CG31013	-0.361459	0.846632	0.602242	0.31186	-0.0905325	0.909586	1.52017	0.0159931	0	0	0	0	1	0
FBtr0071414	CG2990	-1.08081	0.044871	0.0791224	0.858034	-0.433229	0.32163	1.51954	0.00292166	-1	0	0	0	1	0
FBtr0089001	CG30502	-0.234195	0.959787	0.124978	0.848301	0.595975	0.357879	1.51738	0.017531	0	0	0	0	1	0
FBtr0085722	Npc2h	0.81878	0.254935	-0.147715	0.796494	0.304085	0.5959	1.50833	0.0105796	0	0	0	0	1	0
FBtr0072695	robl62A	-0.127117	0.995616	-0.338623	0.731428	-0.877792	0.386769	1.5075	0.0913019	0	0	0	0	1	0
FBtr0074346	CG33252	-1.65661	0.170754	-3.14557	0.00985472	0.0727103	0.957223	1.50637	0.0829781	0	-1	0	0	1	0
FBtr0085721	Npc2h	0.793612	0.310963	-0.215887	0.70676	0.054857	0.944988	1.50565	0.013228	0	0	0	0	1	0
FBtr0088632	CG13741	-0.217017	0.981967	-0.310133	0.64092	0.332849	0.650908	1.50353	0.0280113	0	0	0	0	1	0
FBtr0083676	CG31226	-0.0975422	0.995616	0.003677	0.997366	-1.78798	0.116604	1.50301	0.0914382	0	0	0	-1	1	0
FBtr0070442	CG9904	-0.0194889	0.996486	0.71582	0.152039	0.585127	0.258564	1.50169	0.00548989	0	0	0	0	1	0
FBtr0084490	CG31141	-0.0343584	0.996486	-0.0343311	0.960019	-0.102376	0.894393	1.4998	0.015622	0	0	0	0	1	0
FBtr0082110	CG9399	0.53964	0.758391	0.354522	0.619711	0.654512	0.391237	1.49891	0.0368259	0	0	0	0	1	0
FBtr0088496	CG1690	-0.0179641	0.99897	-1.23261	0.266387	-0.523187	0.665195	1.49358	0.131763	0	0	0	0	1	0
FBtr0085586	CG31025	0.165914	0.995616	0.462571	0.665762	-0.654119	0.5646	1.49206	0.124322	0	0	0	0	1	0
FBtr0087440	CG12859	0.892401	0.689424	0.670745	0.518885	1.07944	0.343614	1.49034	0.125149	0	0	0	0	1	0
FBtr0083725	CG14292	0.214056	0.995616	-0.232488	0.792322	1.25053	0.191777	1.48909	0.0607486	0	0	0	0	1	0
FBtr0074916	Su(z)12	-0.128019	0.995616	0.56535	0.308008	0.147526	0.828958	1.48517	0.0129086	0	0	0	0	1	0
FBtr0082568	CG4115	1.24333	0.416156	0.0227299	0.98478	1.16441	0.292834	1.48504	0.110951	0	0	0	0	1	0
FBtr0079515	CG7025	1.09275	0.385242	0.180022	0.844755	0.976812	0.292834	1.48299	0.0674555	0	0	0	0	1	0
FBtr0087768	lat	-0.26722	0.796017	0.730216	0.0968581	0.142768	0.749152	1.4828	0.00243333	0	1	0	0	1	0
FBtr0085769	CG31005	0.465765	0.932658	-1.21925	0.235374	1.13714	0.296974	1.48094	0.107457	0	0	0	0	1	0
FBtr0072241	Nxt1	-0.131638	0.995616	0.732738	0.284297	0.802204	0.277939	1.4753	0.0309819	0	0	0	0	1	0
FBtr0088143	CG30026	-0.52115	0.904493	-1.06023	0.290864	1.27491	0.246407	1.47451	0.106534	0	0	0	0	1	0
FBtr0085655	CG15539	-1.24847	0.260619	-1.16709	0.181361	0.238236	0.815613	1.47352	0.062375	0	0	0	0	1	0
FBtr0076285	CG32061	0.0647009	0.995616	0.307302	0.599945	-0.35823	0.571524	1.47224	0.0182108	0	0	0	0	1	0
FBtr0086277	CG11788	-0.460404	0.740624	1.17572	0.0878506	0.0812834	0.920221	1.47111	0.0188495	0	1	0	0	1	0
FBtr0072006	CG9875	-0.214209	0.971259	-0.126066	0.843609	0.391846	0.531762	1.46357	0.0182501	0	0	0	0	1	0
FBtr0084989	CG31086	0.491246	0.635911	-0.177671	0.756267	0.146744	0.82807	1.4633	0.0130718	0	0	0	0	1	0
FBtr0080252	kek2	-0.78223	0.182483	0.597891	0.204897	0.0871434	0.885647	1.46323	0.00541	0	0	0	0	1	0
FBtr0089034	Tsp42En	-0.169057	0.995616	-0.161498	0.815639	0.856831	0.235658	1.46206	0.0273544	0	0	0	0	1	0
FBtr0088222	mms4	-1.04266	0.15715	0.834456	0.166352	0.100887	0.893645	1.46196	0.0158619	0	0	0	0	1	0
FBtr0076915	Dbi	0.988157	0.506736	0.739844	0.412456	0.693862	0.473393	1.46191	0.090191	0	0	0	0	1	0
FBtr0075662	CG13460	-0.226901	0.956957	0.0144249	0.98229	0.541169	0.371839	1.46175	0.0159931	0	0	0	0	1	0
FBtr0085184	Gr98a	-0.846417	0.257502	0.996754	0.111647	-0.449796	0.443214	1.46133	0.014584	0	1	0	0	1	0
FBtr0079151	CG9016	0.106696	0.995616	-0.131085	0.891375	-0.26845	0.802749	1.46043	0.077403	0	0	0	0	1	0
FBtr0072001	CG13541	0.197276	0.987241	0.354291	0.575152	0.61876	0.366043	1.45896	0.0273198	0	0	0	0	1	0
FBtr0086206	CG9447	-0.34606	0.862187	0.249181	0.676348	-0.0199275	0.982772	1.45633	0.0183747	0	0	0	0	1	0
FBtr0073007	CG32487	0.100881	0.995616	0.269804	0.59497	-0.199038	0.736953	1.45611	0.0104634	0	0	0	0	1	0
FBtr0082298	CG14694	-0.15702	0.995616	-0.0187455	0.979925	0.694402	0.327248	1.45481	0.0309462	0	0	0	0	1	0
FBtr0081307	CG18806	-0.161348	0.995616	0.293118	0.688023	0.251538	0.770217	1.45419	0.0409764	0	0	0	0	1	0
FBtr0072553	Ppm1	-0.0841922	0.995616	0.141194	0.903312	-0.525245	0.647216	1.45315	0.126342	0	0	0	0	1	0
FBtr0076682	Ect4	0.0546323	0.995616	0.0163068	0.979711	0.735294	0.244974	1.45213	0.0160415	0	0	0	0	1	0
FBtr0084408	DNApol-epsilon	-0.433516	0.499099	0.199556	0.611822	-0.244492	0.564111	1.45193	0.00310595	0	0	0	0	1	0
FBtr0075371	CG13059	0.568954	0.805412	-0.228388	0.80077	0.559324	0.531412	1.45159	0.0697628	0	0	0	0	1	0
FBtr0072796	CG18173	-0.00942451	0.99897	-0.150924	0.85303	0.154003	0.877829	1.44974	0.0480805	0	0	0	0	1	0
FBtr0088805	CG14757	0.359007	0.798895	0.162248	0.769121	0.244324	0.675761	1.44905	0.0115883	0	0	0	0	1	0
FBtr0077148	CG4835	-2.15346	0.00472079	-0.43951	0.391703	0.106734	0.87671	1.44412	0.0112508	-1	0	0	0	1	0
FBtr0073198	Gr64d	0.194757	0.944078	0.148057	0.752688	0.73278	0.163523	1.4438	0.00548989	0	0	0	0	1	0
FBtr0075892	CG17300	0.105915	0.995616	0.229983	0.73445	0.0680101	0.940725	1.44363	0.0296648	0	0	0	0	1	0
FBtr0083696	CG14297	0.303549	0.975666	2.06589	0.0505028	-0.124843	0.916503	1.44349	0.0801829	0	1	0	0	1	0
FBtr0076138	CG6084	0.144868	0.986668	0.166479	0.730983	0.141078	0.807227	1.43913	0.00697167	0	0	0	0	1	0
FBtr0083533	Atg8b	0.121647	0.995616	0.149711	0.816553	-0.0657329	0.937297	1.43357	0.0220557	0	0	0	0	1	0
FBtr0075385	CG18814	-0.226937	0.995423	-0.181198	0.840847	0.9383	0.298943	1.43134	0.0703238	0	0	0	0	1	0
FBtr0075837	CG14113	0.223563	0.995616	0.502633	0.609793	0.178329	0.893043	1.42713	0.11694	0	0	0	0	1	0
FBtr0084852	CG10560	0.562405	0.49021	-0.328248	0.504809	-0.0782764	0.908321	1.42633	0.0105435	0	0	0	0	1	0
FBtr0085121	CG17991	-0.837371	0.407378	0.247108	0.720743	0.0225957	0.982772	1.42613	0.0340545	0	0	0	0	1	0
FBtr0078270	Mst77F	-0.45308	0.948212	-0.18869	0.87209	-0.465622	0.698212	1.42565	0.140509	0	0	0	0	1	0
FBtr0082223	CG12816	0.0931677	0.995616	0.0416702	0.97506	-0.593996	0.595725	1.42524	0.133154	0	0	0	0	1	0
FBtr0076916	Dbi	0.968452	0.490658	0.793271	0.359725	0.629473	0.49196	1.42482	0.0818795	0	0	0	0	1	0
FBtr0077656	CG17261	-0.182892	0.963552	0.0414825	0.941332	0.552521	0.295047	1.42227	0.00879162	0	0	0	0	1	0
FBtr0074621	CG6470	0.379114	0.945008	0.841482	0.336191	0.06783	0.957452	1.42109	0.0849106	0	0	0	0	1	0
FBtr0085044	CG6403	-1.64977	0.1406	0.665168	0.432507	1.18331	0.223026	1.41523	0.0822974	-1	0	0	0	1	0
FBtr0073446	CG11106	-0.17684	0.995616	-0.0646266	0.958642	-0.370767	0.769598	1.41455	0.141206	0	0	0	0	1	0
FBtr0084240	CG5386	0.194797	0.995616	1.20469	0.193064	0.531915	0.572317	1.41247	0.088207	0	0	0	0	1	0
FBtr0086787	CG5757	-0.0957383	0.995616	0.0507155	0.949729	0.959107	0.217761	1.40829	0.0397948	0	0	0	0	1	0
FBtr0070283	CG3740	-0.124144	0.995616	0.440618	0.421866	0.38626	0.513281	1.40796	0.0170705	0	0	0	0	1	0
FBtr0079770	Or30a	0.103065	0.995616	0.912719	0.324458	-0.158378	0.897323	1.40601	0.101092	0	0	0	0	1	0
FBtr0079148	Gpdh	0.292675	0.919932	-0.402167	0.485842	0.234701	0.729298	1.40552	0.02209	0	0	0	0	1	0
FBtr0077758	CG16995	0.206423	0.995616	0.78827	0.406188	1.02958	0.319953	1.40494	0.11153	0	0	0	0	1	0
FBtr0088241	CG30016	0.637713	0.785976	1.73425	0.0926369	1.48275	0.161884	1.40302	0.0934227	0	1	0	0	1	0
FBtr0082514	CG6971	0.369512	0.907287	0.663058	0.351136	0.212487	0.810499	1.40046	0.0453289	0	0	0	0	1	0
FBtr0077975	CG14343	-1.86796	0.0236673	0.148693	0.821681	-0.892039	0.203567	1.40009	0.0264267	-1	0	0	0	1	0
FBtr0078393	CG7202	0.0323045	0.997748	0.0733789	0.949368	-0.282442	0.817	1.39889	0.122536	0	0	0	0	1	0
FBtr0078908	CG14645	-0.138167	0.995616	-0.527902	0.312487	0.521175	0.348822	1.39722	0.0130718	0	0	0	0	1	0
FBtr0070145	CG13359	-0.111945	0.995423	1.76433	0.00216735	0.0929331	0.850745	1.39706	0.0033999	0	1	0	0	1	0
FBtr0080381	t-cup	1.42852	0.169146	1.46512	0.105369	0.440051	0.606041	1.3931	0.0661219	0	1	0	0	1	0
FBtr0087075	Fen1	-0.234107	0.931225	0.214278	0.670271	0.615492	0.264302	1.39308	0.0111435	0	0	0	0	1	0
FBtr0072390	CG18506	0.194103	0.995616	-1.31776	0.158406	1.12576	0.245853	1.39093	0.0894421	0	0	0	0	1	0
FBtr0080157	dUTPase	-0.815169	0.692453	-0.543051	0.57028	0.0725101	0.959319	1.38525	0.120632	0	0	0	0	1	0
FBtr0071980	CG9877	-0.494314	0.922725	-0.118267	0.918945	-0.117075	0.932752	1.38505	0.132588	0	0	0	0	1	0
FBtr0085182	CG13978	-0.0355807	0.996486	-0.0562581	0.948804	-0.365642	0.657554	1.38331	0.054162	0	0	0	0	1	0
FBtr0073716	CG32643	-0.00475864	0.999741	0.683308	0.396598	0.741982	0.390566	1.38326	0.0730382	0	0	0	0	1	0
FBtr0076276	CG6463	0.78683	0.376731	-0.0360103	0.960019	0.682367	0.300267	1.38099	0.0266435	0	0	0	0	1	0
FBtr0085747	CG31007	0.181779	0.995616	0.24905	0.754119	0.340604	0.68754	1.37769	0.057945	0	0	0	0	1	0
FBtr0088790	Mlh1	-0.587359	0.263511	0.253624	0.504809	0.0100919	0.98606	1.37747	0.00357376	0	0	0	0	1	0
FBtr0072985	CG32485	-0.186187	0.985392	1.00234	0.128826	0.277431	0.676239	1.37697	0.0251362	0	1	0	0	1	0
FBtr0079152	CG9016	-0.265836	0.995423	-0.0240094	0.981986	-0.436333	0.675357	1.37654	0.108228	0	0	0	0	1	0
FBtr0078952	CG9772	-0.436455	0.67988	0.0196771	0.975254	0.0765728	0.912432	1.37509	0.0132493	0	0	0	0	1	0
FBtr0083675	CG31226	-0.115565	0.995616	-0.0691576	0.953405	-2.17281	0.0760098	1.37165	0.133679	0	0	0	-1	1	0
FBtr0087076	Ugt37c1	-0.12157	0.995616	-0.0287215	0.976877	0.469097	0.594888	1.37085	0.0773312	0	0	0	0	1	0
FBtr0087920	Cpr49Ae	0.406799	0.829535	-1.15147	0.110519	-0.810878	0.252827	1.36875	0.033208	0	-1	0	0	1	0
FBtr0084367	Nha2	0.582995	0.748074	0.917589	0.24204	0.118196	0.908626	1.36873	0.0614771	0	0	0	0	1	0
FBtr0080926	CG13284	0.330713	0.925364	-0.442421	0.505692	0.610587	0.398151	1.36755	0.0421017	0	0	0	0	1	0
FBtr0075334	CG13030	-0.0145294	0.998044	0.272816	0.671941	-0.384406	0.57195	1.36501	0.033208	0	0	0	0	1	0
FBtr0071997	CG30187	0.878476	0.176642	0.786944	0.143061	-0.0331208	0.964033	1.36425	0.0120133	0	1	0	0	1	0
FBtr0071920	Obp58c	-0.22217	0.972261	0.111531	0.870651	0.541418	0.411292	1.36269	0.03085	0	0	0	0	1	0
FBtr0089465	Sdic3	-0.351964	0.945649	-0.307148	0.713265	0.246743	0.806659	1.36187	0.0775926	0	0	0	0	1	0
FBtr0082153	CG9459	0.445732	0.939076	-0.447557	0.652502	0.33444	0.779846	1.36101	0.131825	0	0	0	0	1	0
FBtr0070840	lin-52	-0.349532	0.902948	0.478852	0.456745	0.94356	0.208666	1.35734	0.0390703	0	0	0	0	1	0
FBtr0080130	CG7299	0.62275	0.64314	0.739102	0.295696	0.622737	0.399057	1.35613	0.0464257	0	0	0	0	1	0
FBtr0082783	CG8508	0.511118	0.610338	0.505136	0.35235	-0.122016	0.860933	1.35415	0.018236	0	0	0	0	1	0
FBtr0082279	Mcm5	-0.430436	0.637063	0.212086	0.658385	-0.258273	0.615988	1.35395	0.0104337	0	0	0	0	1	0
FBtr0082776	CG15887	-0.240647	0.974842	0.0549918	0.945836	0.193664	0.819975	1.35043	0.0458207	0	0	0	0	1	0
FBtr0077748	Cyp309a2	-0.0584116	0.996486	0.263499	0.789045	1.13866	0.266389	1.34924	0.112325	0	0	0	0	1	0
FBtr0080672	CG4701	0.069572	0.995616	0.172584	0.811061	0.00299289	0.997886	1.34666	0.0417899	0	0	0	0	1	0
FBtr0081827	Mcm2	-0.559611	0.489037	0.145552	0.785254	-0.266236	0.625834	1.3459	0.013195	0	0	0	0	1	0
FBtr0079449	CG6055	0.379815	0.91697	-0.232503	0.771363	1.12331	0.197791	1.34463	0.0633127	0	0	0	0	1	0
FBtr0085524	CR31032	0.227336	0.995616	1.75786	0.106752	0.755368	0.455365	1.34419	0.125387	0	1	0	0	1	0
FBtr0079481	CG7211	0.442478	0.740233	0.40488	0.46871	0.203444	0.766967	1.34308	0.0239425	0	0	0	0	1	0
FBtr0083024	RpL10Aa	-0.131542	0.995616	-0.140024	0.845318	-0.245324	0.753978	1.33958	0.041367	0	0	0	0	1	0
FBtr0084152	CG17819	0.035185	0.996486	0.262805	0.67829	0.186275	0.810132	1.33755	0.0332366	0	0	0	0	1	0
FBtr0080673	HDC02577	0.192615	0.995616	0.536381	0.486131	-0.176244	0.861087	1.33703	0.073912	0	0	0	0	1	0
FBtr0086089	CG10396	0.152119	0.995616	0.209797	0.774493	0.145226	0.873297	1.3365	0.0472479	0	0	0	0	1	0
FBtr0082154	CG16904	0.242011	0.979822	0.208841	0.788183	0.274616	0.747069	1.33462	0.0568459	0	0	0	0	1	0
FBtr0079159	CG31644	-0.0483614	0.995616	0.0974088	0.879223	-0.310588	0.626773	1.33242	0.0268485	0	0	0	0	1	0
FBtr0084917	CG31093	0.313796	0.77158	0.368402	0.386668	0.133789	0.798314	1.33239	0.00666347	0	0	0	0	1	0
FBtr0081475	Mcm10	-0.418822	0.879602	-0.104595	0.898651	-0.186772	0.840056	1.33073	0.0600829	0	0	0	0	1	0
FBtr0080579	CG9014	0.31814	0.985322	0.255347	0.813842	-0.206725	0.877678	1.32985	0.146512	0	0	0	0	1	0
FBtr0080265	Tsp33B	0.033502	0.996882	0.333992	0.712441	-0.231426	0.834986	1.32521	0.104958	0	0	0	0	1	0
FBtr0071009	CG4593	0.112535	0.995616	1.62151	0.0148863	0.697898	0.231994	1.3229	0.016515	0	1	0	0	1	0
FBtr0071836	CG11362	-0.0867135	0.995616	0.0565149	0.943757	-0.160021	0.854125	1.32246	0.0484018	0	0	0	0	1	0
FBtr0083137	Rpb7	-0.227168	0.995423	-0.0746074	0.936246	0.956335	0.275889	1.31995	0.0801256	0	0	0	0	1	0
FBtr0082618	Cyp313a2	0.0345774	0.996486	0.294768	0.652502	0.307858	0.673027	1.31973	0.0409764	0	0	0	0	1	0
FBtr0072132	CG5602	-0.339719	0.897162	0.0184766	0.97956	-0.454443	0.493087	1.31648	0.0362573	0	0	0	0	1	0
FBtr0087114	Picot	0.392089	0.667192	-0.42148	0.347617	0.369627	0.435342	1.31569	0.00904912	0	0	0	0	1	0
FBtr0075009	pip	-0.537536	0.78233	-0.380951	0.607591	-0.427229	0.594888	1.3105	0.0665382	0	0	0	0	1	0
FBtr0081454	CheB38b	0.204752	0.975865	0.926293	0.147195	0.0496812	0.953901	1.31036	0.029931	0	1	0	0	1	0
FBtr0086664	IM2	-0.693001	0.442818	-0.773543	0.206519	-0.893344	0.189917	1.31022	0.028819	0	0	0	0	1	0
FBtr0083023	CG14861	0.00966257	0.999283	0.510918	0.563229	-0.299821	0.783378	1.30963	0.112433	0	0	0	0	1	0
FBtr0079935	CG33301	0.318887	0.959787	-0.0951105	0.919332	0.558637	0.519957	1.30749	0.0889007	0	0	0	0	1	0
FBtr0091774	CG33773	-0.00383432	0.999741	0.0962927	0.886573	0.495992	0.446114	1.30651	0.0345483	0	0	0	0	1	0
FBtr0083245	glob1	0.464152	0.754973	-0.7761	0.222641	1.01514	0.161981	1.30536	0.034046	0	0	0	0	1	0
FBtr0079478	Ntl	0.643453	0.623948	0.35369	0.609683	-0.172994	0.844151	1.30513	0.0530035	0	0	0	0	1	0
FBtr0070211	Tsp2A	0.132483	0.995616	1.51529	0.144227	0.360162	0.748065	1.30294	0.135547	0	1	0	0	1	0
FBtr0086295	CG13426	0.113019	0.994356	0.745804	0.0979144	0.251825	0.546504	1.30054	0.00484925	0	1	0	0	1	0
FBtr0071228	Caf1-180	-0.485739	0.493769	0.135023	0.771668	-0.0823682	0.889143	1.30015	0.00860743	0	0	0	0	1	0
FBtr0070298	CG14787	1.098	0.480522	1.15961	0.245222	1.02726	0.323559	1.29836	0.141206	0	0	0	0	1	0
FBtr0085472	CG7567	-1.66968	0.15725	0.067001	0.949702	0.709737	0.457359	1.29633	0.119147	0	0	0	0	1	0
FBtr0072297	CG16837	0.0180136	0.997933	0.255754	0.693928	0.976479	0.189499	1.2945	0.0411488	0	0	0	0	1	0
FBtr0073088	CG14968	0.660747	0.57969	1.39792	0.0748921	0.479456	0.500271	1.29407	0.0488949	0	1	0	0	1	0
FBtr0087792	CG13321	0.651758	0.742696	1.20595	0.179787	0.6236	0.485356	1.29375	0.101028	0	0	0	0	1	0
FBtr0088493	CG1648	0.860969	0.491374	-0.153905	0.854568	0.644549	0.43112	1.29368	0.0776855	0	0	0	0	1	0
FBtr0084357	CG17119	0.500915	0.76534	0.257687	0.710231	-0.0102281	0.991695	1.29302	0.0496866	0	0	0	0	1	0
FBtr0080872	CG5968	-0.062724	0.995616	-0.0745225	0.920599	-0.251401	0.738204	1.29262	0.0436524	0	0	0	0	1	0
FBtr0086990	CG10950	0.039091	0.996486	0.134412	0.894632	-0.540572	0.584342	1.29172	0.124654	0	0	0	0	1	0
FBtr0082740	CG8774	0.502919	0.823773	-0.315641	0.6906	-0.575035	0.483747	1.29138	0.0790549	0	0	0	0	1	0
FBtr0070293	Rab27	1.20506	0.388274	4.41253	0.00174647	0.755104	0.446506	1.29073	0.132671	0	1	0	0	1	0
FBtr0072653	CG9129	0.111359	0.995616	0.266261	0.711422	-0.75334	0.319777	1.28919	0.0562904	0	0	0	0	1	0
FBtr0079714	Peritrophin-15b	-0.247116	0.984595	-0.408106	0.590495	0.817603	0.32227	1.2891	0.0769947	0	0	0	0	1	0
FBtr0082952	CG14840	0.0999238	0.995616	0.390885	0.425126	0.436871	0.408712	1.28798	0.0158634	0	0	0	0	1	0
FBtr0083673	CG14302	1.22798	0.103021	0.650606	0.274009	0.689853	0.280603	1.28601	0.0303869	1	0	0	0	1	0
FBtr0086632	CG15096	0.337972	0.865721	-0.358978	0.527403	0.163477	0.818902	1.28526	0.0296648	0	0	0	0	1	0
FBtr0072122	CG30177	0.0694518	0.995616	0.360063	0.542371	-0.0356354	0.967534	1.28525	0.0335319	0	0	0	0	1	0
FBtr0088982	dpa	-0.536171	0.549947	0.546643	0.303651	-0.526719	0.35063	1.28414	0.0195905	0	0	0	0	1	0
FBtr0070355	CG32801	0.245515	0.97354	1.40466	0.0838981	0.817596	0.287226	1.28287	0.0566087	0	1	0	0	1	0
FBtr0071611	CG17974	1.09505	0.420531	-0.0218575	0.983362	0.518725	0.590286	1.28189	0.119147	0	0	0	0	1	0
FBtr0070926	CG15892	0.222716	0.991415	0.852649	0.270144	0.429622	0.597442	1.28103	0.074532	0	0	0	0	1	0
FBtr0087417	CG7544	-0.530237	0.551046	-0.0661146	0.91191	0.214448	0.718669	1.27942	0.0191764	0	0	0	0	1	0
FBtr0070258	mei-38	-0.589989	0.451347	1.01886	0.0826069	0.143251	0.81789	1.27937	0.0166668	0	1	0	0	1	0
FBtr0076258	CG14154	0.520529	0.886491	-0.24192	0.810583	-0.169861	0.892089	1.27925	0.133418	0	0	0	0	1	0
FBtr0080791	CG31735	0.517561	0.8746	0.528398	0.55157	-0.169242	0.888955	1.27446	0.123008	0	0	0	0	1	0
FBtr0071690	CG10433	0.225945	0.971969	0.346246	0.571554	0.980358	0.176507	1.27307	0.0400115	0	0	0	0	1	0
FBtr0084351	CG17109	0.0460067	0.996486	0.310766	0.63056	0.496384	0.466034	1.26949	0.0458472	0	0	0	0	1	0
FBtr0086540	Elongin-C	0.357263	0.931225	0.0923622	0.915117	0.883252	0.287786	1.26616	0.0773312	0	0	0	0	1	0
FBtr0076140	Muc68Ca	-0.0785043	0.995616	-0.586558	0.218913	0.0951853	0.875147	1.26301	0.0120133	0	0	0	0	1	0
FBtr0079204	CG13989	0.206086	0.972108	0.331587	0.558447	0.189114	0.786836	1.263	0.03085	0	0	0	0	1	0
FBtr0077471	CG15425	0.346986	0.70372	0.160474	0.710449	0.37753	0.398287	1.26278	0.00822472	0	0	0	0	1	0
FBtr0084127	CG31233	0.670116	0.638779	0.066239	0.938816	-0.301726	0.72227	1.26042	0.074292	0	0	0	0	1	0
FBtr0075474	CG13047	-0.175012	0.995616	0.307071	0.761426	0.752466	0.456131	1.25983	0.147526	0	0	0	0	1	0
FBtr0083277	mtSSB	0.208092	0.98842	0.648951	0.343838	0.719369	0.326891	1.25882	0.0568971	0	0	0	0	1	0
FBtr0085255	CG5527	-0.0500736	0.996486	0.221823	0.80077	0.222792	0.82597	1.25869	0.0988862	0	0	0	0	1	0
FBtr0070952	Mcm6	-0.508471	0.441399	0.312199	0.45616	-0.160616	0.749369	1.25812	0.00898766	0	0	0	0	1	0
FBtr0077948	CG5556	0.288427	0.886499	0.452222	0.379456	0.855739	0.162178	1.25611	0.0203108	0	0	0	0	1	0
FBtr0076552	CG5280	0.0273781	0.997933	0.0609663	0.951407	-0.384184	0.689033	1.25446	0.111372	0	0	0	0	1	0
FBtr0082712	timeout	-0.11726	0.995616	-0.143529	0.87948	-0.328393	0.744673	1.254	0.113378	0	0	0	0	1	0
FBtr0076379	CG3222	0.460001	0.865721	0.301582	0.710088	-0.0413774	0.971484	1.25335	0.0911612	0	0	0	0	1	0
FBtr0077700	CG9879	0.203533	0.960189	0.36626	0.476459	0.366307	0.51152	1.25225	0.022365	0	0	0	0	1	0
FBtr0077129	CG10592	-0.565124	0.522893	-0.453086	0.395965	0.840454	0.179835	1.25172	0.0245782	0	0	0	0	1	0
FBtr0076338	CG32050	0.483689	0.812498	0.0979018	0.903682	-1.25029	0.144059	1.24965	0.0695229	0	0	0	-1	1	0
FBtr0087881	CG8785	0.869376	0.493769	0.239793	0.773694	-0.340768	0.70115	1.24882	0.0908327	0	0	0	0	1	0
FBtr0073800	CG32633	0.957885	0.292723	0.586127	0.372159	0.779068	0.28219	1.24843	0.0513102	0	0	0	0	1	0
FBtr0088806	CG30373	0.32582	0.950378	0.988516	0.223456	0.866875	0.307988	1.2481	0.0905689	0	0	0	0	1	0
FBtr0076703	CG13672	-0.575387	0.491374	2.30417	0.00236296	-0.438927	0.421456	1.24438	0.0210065	0	1	0	0	1	0
FBtr0077757	CG31949	-0.00708253	0.99897	0.23883	0.647215	-0.0412061	0.957223	1.24272	0.02209	0	0	0	0	1	0
FBtr0073086	CG14968	0.619945	0.638779	1.26554	0.106752	0.354044	0.639095	1.23939	0.0607486	0	1	0	0	1	0
FBtr0081984	CG9740	-0.373143	0.951631	-0.063682	0.953259	0.552837	0.573314	1.23901	0.137979	0	0	0	0	1	0
FBtr0077792	CG3597	0.749764	0.36767	0.287346	0.610542	0.580869	0.339706	1.23658	0.0313786	0	0	0	0	1	0
FBtr0082734	CG8141	0.476295	0.676755	0.456231	0.405653	0.10153	0.891458	1.23652	0.0290828	0	0	0	0	1	0
FBtr0089713	CG16838	-0.44678	0.778034	-0.173471	0.791555	-0.108586	0.894832	1.23625	0.0420096	0	0	0	0	1	0
FBtr0078356	M6	0.206942	0.979589	0.358903	0.556351	0.396735	0.549703	1.23618	0.043425	0	0	0	0	1	0
FBtr0080362	Patsas	-0.87421	0.522918	0.819549	0.325678	-0.0165783	0.988689	1.236	0.107457	0	0	0	0	1	0
FBtr0084806	CG31106	0.117745	0.995616	-1.0341	0.0985812	-0.030314	0.969457	1.23376	0.0275756	0	-1	0	0	1	0
FBtr0071425	CG32692	0.561457	0.835285	-0.803928	0.365471	0.474447	0.625218	1.23241	0.130025	0	0	0	0	1	0
FBtr0072106	CG17662	0.0512258	0.996486	0.175031	0.862586	0.803567	0.41235	1.232	0.143717	0	0	0	0	1	0
FBtr0081958	CG11967	-0.0775348	0.995616	0.144748	0.74994	0.405952	0.376528	1.23102	0.0102199	0	0	0	0	1	0
FBtr0075643	CG6878	0.47706	0.798625	0.931893	0.199344	1.02709	0.199031	1.23057	0.0639667	0	0	0	0	1	0
FBtr0089526	CG33490	-0.116404	0.995616	0.298796	0.682267	-0.646418	0.397779	1.22985	0.0724546	0	0	0	0	1	0
FBtr0078954	CG9772	-0.241655	0.995616	-0.41458	0.647375	0.11798	0.923372	1.22729	0.136835	0	0	0	0	1	0
FBtr0078182	CG5665	-0.277443	0.985322	0.638796	0.459329	0.46982	0.626176	1.22719	0.128872	0	0	0	0	1	0
FBtr0079765	CG9568	-0.22512	0.951631	-0.253761	0.646069	0.817263	0.199031	1.22713	0.0294482	0	0	0	0	1	0
FBtr0073653	Cpr11B	-0.832763	0.504961	-0.721813	0.346976	-0.187153	0.848158	1.22587	0.0900599	0	0	0	0	1	0
FBtr0086639	CG15093	0.227467	0.974842	-0.0574602	0.939445	0.786858	0.273804	1.22207	0.0530519	0	0	0	0	1	0
FBtr0079147	Gpdh	0.298544	0.85789	-0.584595	0.255571	0.711865	0.21119	1.22185	0.019761	0	0	0	0	1	0
FBtr0089558	CG14488	0.109893	0.995616	0.374345	0.610542	-0.155998	0.873142	1.22081	0.0804006	0	0	0	0	1	0
FBtr0075522	DNApol-delta	-0.461144	0.388526	0.268596	0.44609	0.168344	0.676239	1.2187	0.00439891	0	0	0	0	1	0
FBtr0079065	CG14033	-0.0378965	0.996486	1.38006	0.0623641	-1.08268	0.144059	1.21827	0.046207	0	1	0	-1	1	0
FBtr0082360	CG17734	0.231719	0.952297	-0.188418	0.754871	0.705314	0.266608	1.21717	0.0343069	0	0	0	0	1	0
FBtr0086479	Obp56c	-0.290323	0.84115	0.0669961	0.897907	0.751049	0.170485	1.21461	0.015734	0	0	0	0	1	0
FBtr0077925	Cdlc2	-0.0323769	0.996486	0.169008	0.781141	-0.261831	0.681465	1.21431	0.0340545	0	0	0	0	1	0
FBtr0082735	CG11686	-0.190456	0.995616	-0.0280432	0.97618	1.25507	0.167568	1.21396	0.093403	0	0	0	0	1	0
FBtr0070546	CG3526	0.129313	0.995616	1.25116	0.0988675	0.279933	0.70865	1.21253	0.0565906	0	1	0	0	1	0
FBtr0076463	CG3552	0.256052	0.94001	0.287292	0.612058	0.795379	0.217119	1.21243	0.0340545	0	0	0	0	1	0
FBtr0079764	Try29f	-0.517759	0.812476	0.858568	0.275742	1.26956	0.163308	1.2116	0.0937843	0	0	0	0	1	0
FBtr0075361	CG4098	-1.97608	0.0012956	0.675791	0.110519	-0.078379	0.873702	1.21005	0.00541937	-1	1	0	0	1	0
FBtr0083741	CG5217	-0.084236	0.995616	0.373532	0.666421	-0.590058	0.51593	1.2089	0.12386	0	0	0	0	1	0
FBtr0072941	CG33233	-0.776007	0.58184	-0.899209	0.26772	0.979492	0.265189	1.20816	0.101643	0	0	0	0	1	0
FBtr0080745	CG15260	0.152781	0.995616	0.0658881	0.926701	-0.275662	0.692576	1.2081	0.045988	0	0	0	0	1	0
FBtr0078150	CG31974	-0.0635442	0.995616	-0.369057	0.566981	0.190006	0.815178	1.20802	0.0559812	0	0	0	0	1	0
FBtr0085317	CG31050	0.0818905	0.995616	0.0698839	0.940275	0.503977	0.558959	1.20712	0.104851	0	0	0	0	1	0
FBtr0080266	CG12307	0.139363	0.995616	0.00095239	0.998905	0.0258407	0.973185	1.20563	0.0282721	0	0	0	0	1	0
FBtr0081197	CG13086	0.0502195	0.996486	0.148347	0.854802	0.547008	0.488038	1.20403	0.0870799	0	0	0	0	1	0
FBtr0084215	CG7069	0.784335	0.237553	1.57659	0.0140289	0.245998	0.65507	1.2037	0.0203914	0	1	0	0	1	0
FBtr0082316	tomboy20	0.0299121	0.997311	0.196524	0.831531	-0.63087	0.483905	1.20242	0.124322	0	0	0	0	1	0
FBtr0088645	Ggamma1	0.194008	0.942474	-0.266868	0.535821	0.436963	0.352303	1.20239	0.0121961	0	0	0	0	1	0
FBtr0079302	CG11201	0.722737	0.697891	-0.147794	0.876988	-0.231908	0.830537	1.19903	0.131003	0	0	0	0	1	0
FBtr0075824	CG10116	-0.630644	0.515935	-0.267338	0.65504	-0.299239	0.649297	1.19821	0.0414205	0	0	0	0	1	0
FBtr0075887	CG11279	-0.121905	0.995616	-0.054686	0.953057	1.01736	0.245164	1.1972	0.101212	0	0	0	0	1	0
FBtr0081438	RPA2	-0.608824	0.214237	0.503314	0.197616	0.186321	0.650677	1.19629	0.0055802	0	0	0	0	1	0
FBtr0080731	ms(2)35Ci	0.210305	0.995616	0.606179	0.447788	-0.0819654	0.943294	1.19615	0.111546	0	0	0	0	1	0
FBtr0083198	CG31294	0.0498319	0.996486	0.35038	0.60264	-0.205378	0.806679	1.19606	0.0654803	0	0	0	0	1	0
FBtr0079720	CG13392	-0.139502	0.995616	0.616261	0.306818	0.843315	0.212287	1.19581	0.0426149	0	0	0	0	1	0
FBtr0080363	Patsas	-0.802798	0.635911	0.733351	0.404292	-0.120389	0.920255	1.19578	0.138239	0	0	0	0	1	0
FBtr0083998	Calx	0.304776	0.931225	-1.08895	0.129666	0.548379	0.421942	1.19466	0.0555587	0	-1	0	0	1	0
FBtr0075465	CG13067	0.543037	0.796017	-0.913484	0.250834	0.539469	0.510859	1.19418	0.0990917	0	0	0	0	1	0
FBtr0087387	dup	-0.291918	0.815949	0.0671279	0.889257	-0.173031	0.732974	1.19359	0.0128553	0	0	0	0	1	0
FBtr0083308	CG14898	0.127173	0.995616	1.16123	0.152039	1.15834	0.187143	1.19342	0.0919115	0	0	0	0	1	0
FBtr0082592	desat2	-0.0306902	0.996486	0.946359	0.135874	0.384446	0.533624	1.19228	0.0390899	0	1	0	0	1	0
FBtr0073964	CG5599	-0.269284	0.871797	0.13083	0.792728	0.373178	0.447564	1.19192	0.0160806	0	0	0	0	1	0
FBtr0084435	CG10157	1.12463	0.167756	0.666701	0.290297	0.817197	0.2396	1.19153	0.0490256	0	0	0	0	1	0
FBtr0078151	CG31975	-0.493611	0.628822	0.4054	0.442026	0.154121	0.816823	1.18967	0.0299776	0	0	0	0	1	0
FBtr0086881	sub	-0.519952	0.749331	0.0889103	0.908154	0.177434	0.836201	1.18826	0.0680097	0	0	0	0	1	0
FBtr0088195	CG13218	-0.122581	0.995616	0.553165	0.485135	1.23633	0.189499	1.18724	0.11153	0	0	0	0	1	0
FBtr0073690	CG3775	0.190768	0.982701	0.028624	0.968471	0.22428	0.742181	1.18574	0.0411488	0	0	0	0	1	0
FBtr0077523	pgant4	0.643741	0.592466	0.38211	0.56153	0.681331	0.342977	1.18471	0.0644429	0	0	0	0	1	0
FBtr0072408	CG2765	0.270032	0.918133	-0.259643	0.629503	0.478497	0.404261	1.18426	0.03085	0	0	0	0	1	0
FBtr0076038	CG11588	0.0235604	0.996486	0.183268	0.738486	-0.738147	0.213548	1.18169	0.0281671	0	0	0	0	1	0
FBtr0078874	CG14658	0.378945	0.689279	0.0369509	0.943757	0.241363	0.622958	1.18148	0.0149518	0	0	0	0	1	0
FBtr0070500	CG2680	0.993185	0.437516	1.03614	0.229876	1.25959	0.191777	1.1807	0.122564	0	0	0	0	1	0
FBtr0083836	CG4390	0.386216	0.642683	0.443297	0.309601	0.635879	0.199442	1.17873	0.0124605	0	0	0	0	1	0
FBtr0072316	CG3565	0.0602662	0.995616	0.266105	0.69053	0.632516	0.365468	1.17744	0.0614182	0	0	0	0	1	0
FBtr0072633	LysP	-0.0733082	0.995616	0.585355	0.465902	0.635601	0.462455	1.17678	0.119147	0	0	0	0	1	0
FBtr0074795	CG12703	0.406598	0.857502	-0.0384603	0.961865	0.831887	0.269661	1.17535	0.0702141	0	0	0	0	1	0
FBtr0073644	CG2574	0.237696	0.861524	0.289248	0.462281	0.258921	0.547172	1.17504	0.00914291	0	0	0	0	1	0
FBtr0088829	CG12825	0.0708803	0.995616	0.20677	0.781313	0.843138	0.273804	1.17383	0.0768795	0	0	0	0	1	0
FBtr0089123	CG32850	-0.254196	0.985322	-0.429095	0.590175	1.07626	0.235123	1.17364	0.113378	0	0	0	0	1	0
FBtr0091450	CG33510	0.567918	0.717202	-0.6572	0.348081	0.469551	0.529812	1.17262	0.0776855	0	0	0	0	1	0
FBtr0075804	CG10738	-0.446847	0.677609	2.58733	0.00135284	-0.0878485	0.899075	1.17245	0.0282978	0	1	0	0	1	0
FBtr0077516	CG2772	-0.395668	0.928563	-1.16248	0.183813	0.930308	0.300815	1.17086	0.122982	0	0	0	0	1	0
FBtr0080603	CG15293	0.280022	0.943686	-0.814841	0.221464	0.646694	0.347635	1.17046	0.0574545	0	0	0	0	1	0
FBtr0079605	CG14273	0.0130306	0.99897	1.20467	0.172653	0.494195	0.578392	1.16709	0.124542	0	0	0	0	1	0
FBtr0084556	cav	-0.213353	0.951631	0.318875	0.536627	0.509574	0.362444	1.16665	0.0293853	0	0	0	0	1	0
FBtr0074705	CG33254	-0.818332	0.467859	-0.153508	0.843097	0.0687045	0.945855	1.16432	0.082614	0	0	0	0	1	0
FBtr0088354	CG12901	0.151514	0.979822	0.292886	0.512905	0.110928	0.848768	1.16141	0.0166668	0	0	0	0	1	0
FBtr0088557	CG12158	-0.970537	0.48065	-1.04148	0.238531	0.375131	0.698512	1.16037	0.137514	0	0	0	0	1	0
FBtr0080156	dUTPase	-0.585356	0.601003	0.776594	0.222641	0.0853768	0.918617	1.16011	0.051433	0	0	0	0	1	0
FBtr0086335	Obp56h	-1.02585	0.24953	-1.8785	0.0233315	0.604533	0.3906	1.15965	0.0670216	0	-1	0	0	1	0
FBtr0077086	CG5150	-0.315442	0.831313	-0.571566	0.26121	0.720681	0.20527	1.15875	0.0242792	0	0	0	0	1	0
FBtr0079661	CG13386	-0.761807	0.371374	0.107567	0.865396	0.0760715	0.922865	1.1585	0.04297	0	0	0	0	1	0
FBtr0088252	CG7637	0.0698002	0.995616	0.561278	0.488139	1.04435	0.25785	1.15742	0.127437	0	0	0	0	1	0
FBtr0075868	CG14120	-0.525436	0.485764	-1.49935	0.0136231	0.126185	0.828431	1.15657	0.0187905	0	-1	0	0	1	0
FBtr0079817	borr	-0.585168	0.380365	0.665434	0.166508	0.242274	0.621582	1.15601	0.0160806	0	0	0	0	1	0
FBtr0077747	Rad1	-0.773675	0.345304	0.236487	0.682466	0.324534	0.595804	1.15571	0.0409764	0	0	0	0	1	0
FBtr0086638	CG15093	0.236119	0.944399	0.0116408	0.985497	0.794383	0.202197	1.15518	0.0340168	0	0	0	0	1	0
FBtr0082367	CG6693	-0.220422	0.897165	0.930986	0.0554036	0.0775882	0.887694	1.15437	0.0105435	0	1	0	0	1	0
FBtr0070797	NAAT1	0.0159631	0.998025	0.530404	0.389425	0.559077	0.396493	1.15434	0.0541617	0	0	0	0	1	0
FBtr0084339	Tpl94D	0.0199718	0.997933	0.00475342	0.994627	-0.721315	0.32402	1.15343	0.074532	0	0	0	0	1	0
FBtr0070537	Pig1	-0.0209978	0.996948	-0.452173	0.416752	0.645404	0.296981	1.15082	0.0409764	0	0	0	0	1	0
FBtr0084558	cav	-0.340232	0.904493	0.167852	0.810583	0.506864	0.457936	1.15081	0.0639667	0	0	0	0	1	0
FBtr0084557	cav	-0.373115	0.839965	0.122019	0.850919	0.501503	0.427292	1.15016	0.0490256	0	0	0	0	1	0
FBtr0078841	CG1124	0.281039	0.9626	-0.622975	0.39407	1.2186	0.161981	1.14877	0.0954573	0	0	0	0	1	0
FBtr0076747	eIF4E-5	0.4853	0.843383	0.633988	0.412456	0.154302	0.883756	1.14832	0.112019	0	0	0	0	1	0
FBtr0079853	CG31882	-0.563746	0.652455	-0.670585	0.298908	-0.655058	0.335147	1.14691	0.0607486	0	0	0	0	1	0
FBtr0072044	CG30412	0.0187738	0.997933	0.00915903	0.989941	0.50761	0.426393	1.14538	0.0512713	0	0	0	0	1	0
FBtr0077800	robl22E	0.191475	0.995616	0.452882	0.533061	0.776953	0.326439	1.14489	0.0977182	0	0	0	0	1	0
FBtr0084638	CG31128	0.425224	0.671475	0.374534	0.434997	0.0149292	0.984629	1.14477	0.0241955	0	0	0	0	1	0
FBtr0081278	CG10165	-0.167511	0.995423	-0.528861	0.391023	0.652939	0.326792	1.14377	0.0562501	0	0	0	0	1	0
FBtr0080184	Porin2	-1.52468	0.0868566	-0.150505	0.840847	-0.119017	0.896875	1.14109	0.0799249	-1	0	0	0	1	0
FBtr0070807	CG4078	-0.615939	0.305735	0.51658	0.243451	-0.249261	0.590192	1.14021	0.01418	0	0	0	0	1	0
FBtr0082158	MtnA	0.197558	0.979822	-0.238688	0.693614	0.0852146	0.916503	1.13589	0.0503622	0	0	0	0	1	0
FBtr0079843	CG15828	0.366297	0.803644	-0.304166	0.565529	-0.927959	0.144937	1.13526	0.0351054	0	0	0	-1	1	0
FBtr0100028	obst-H	0.307735	0.973211	1.34419	0.149116	1.32958	0.187143	1.13436	0.14978	0	1	0	0	1	0
FBtr0074702twiggy	twiggy	1.07233	0.317379	1.50986	0.087137	0.664667	0.410972	1.13413	0.107176	0	1	0	0	1	0
FBtr0078408	Edg78E	-0.655329	0.285835	0.578952	0.213971	0.41435	0.384799	1.13394	0.0167403	0	0	0	0	1	0
FBtr0082553	CG14739	-0.116475	0.995616	0.193623	0.80817	-0.149171	0.8807	1.133	0.100672	0	0	0	0	1	0
FBtr0071806	PpD5	0.429588	0.477242	0.311892	0.40516	-0.0548544	0.915405	1.13208	0.00826477	0	0	0	0	1	0
FBtr0076098	CG7394	0.427396	0.796266	0.195169	0.762098	0.927962	0.190611	1.13178	0.054854	0	0	0	0	1	0
FBtr0077608	CG3332	0.385573	0.759933	0.716905	0.18694	0.750336	0.203947	1.12884	0.03085	0	0	0	0	1	0
FBtr0082318	CG31373	0.200968	0.986948	-0.413606	0.516821	0.735109	0.300287	1.12635	0.0701004	0	0	0	0	1	0
FBtr0087469	CG12857	0.124615	0.995616	0.1007	0.910758	-0.470973	0.575891	1.12507	0.119147	0	0	0	0	1	0
FBtr0080293	CG18788	-0.0824662	0.995616	1.19233	0.138937	0.132766	0.893049	1.12348	0.101706	0	1	0	0	1	0
FBtr0071863	CG13511	-0.0131925	0.998044	0.392744	0.477427	0.769127	0.228477	1.12272	0.0442317	0	0	0	0	1	0
FBtr0079168	CG11149	-0.306522	0.95661	-0.109466	0.898004	0.263052	0.776779	1.12259	0.111536	0	0	0	0	1	0
FBtr0081386	CG18810	0.198239	0.987241	0.211065	0.756838	0.30642	0.672085	1.12228	0.0688956	0	0	0	0	1	0
FBtr0075217	CG7630	0.343102	0.928563	-0.565289	0.422577	0.704176	0.358419	1.12164	0.0946249	0	0	0	0	1	0
FBtr0073336	CG32240	0.128691	0.995616	0.255495	0.692865	-0.449506	0.503707	1.12148	0.0651841	0	0	0	0	1	0
FBtr0079379	CG17376	0.036675	0.996486	0.0835268	0.88721	0.0517486	0.945855	1.12096	0.0368656	0	0	0	0	1	0
FBtr0084797	CG11781	-0.122737	0.995616	0.507186	0.521418	1.1206	0.218707	1.12054	0.128736	0	0	0	0	1	0
FBtr0080239	CG4970	-0.103951	0.995616	0.414714	0.405413	0.0477325	0.947046	1.12037	0.0293853	0	0	0	0	1	0
FBtr0073554	CG15221	0.246235	0.984977	0.649573	0.393712	0.290925	0.745337	1.12003	0.112192	0	0	0	0	1	0
FBtr0072091	CG5532	0.781818	0.599421	1.05607	0.214796	1.06754	0.244022	1.11776	0.134318	0	0	0	0	1	0
FBtr0077141	CG13285	-0.0862652	0.995616	-0.668283	0.302635	0.698695	0.313461	1.115	0.0682289	0	0	0	0	1	0
FBtr0075872	CG11262	0.0789537	0.995616	0.218256	0.598914	-0.296391	0.503844	1.11274	0.0140849	0	0	0	0	1	0
FBtr0080590	bgm	-0.0312677	0.996486	-0.152004	0.815639	-0.32057	0.628954	1.11218	0.0566978	0	0	0	0	1	0
FBtr0072045	Prosbeta5R	0.26359	0.901132	0.311539	0.51911	-0.127784	0.83728	1.11213	0.02816	0	0	0	0	1	0
FBtr0079117	CG7251	-0.061373	0.995616	0.176312	0.796494	-1.38271	0.0760098	1.1118	0.0677336	0	0	0	-1	1	0
FBtr0077977	CG5139	0.104238	0.995616	0.201395	0.653938	-0.362147	0.442147	1.11159	0.0181005	0	0	0	0	1	0
FBtr0083694	CG7695	-0.259496	0.958471	0.307424	0.640861	0.97766	0.199031	1.11129	0.0756788	0	0	0	0	1	0
FBtr0089665	CG12677	-0.358589	0.865721	-0.209335	0.745272	-0.342808	0.605116	1.10993	0.0602046	0	0	0	0	1	0
FBtr0076882	eco	-0.213935	0.933972	0.470755	0.313213	0.0586961	0.926085	1.1072	0.0218328	0	0	0	0	1	0
FBtr0085670	PH4alphaPV	0.590128	0.77158	-0.093492	0.919456	0.326803	0.722394	1.10491	0.132984	0	0	0	0	1	0
FBtr0083670	CG7710	0.194194	0.95543	0.585024	0.240714	0.68657	0.211918	1.10354	0.0267596	0	0	0	0	1	0
FBtr0078130	CG11562	0.163299	0.995616	1.16943	0.110519	0.788151	0.270773	1.10238	0.0734297	0	1	0	0	1	0
FBtr0070531	CG16782	-0.108457	0.995616	0.470366	0.280714	0.488811	0.297016	1.101	0.0160588	0	0	0	0	1	0
FBtr0079732	CG12438	0.00109837	0.999741	0.138535	0.810249	-0.0466982	0.951712	1.10065	0.0389001	0	0	0	0	1	0
FBtr0084688	Rpb10	-0.185143	0.995423	0.044983	0.953973	0.922184	0.220083	1.10057	0.0800202	0	0	0	0	1	0
FBtr0076067	CG5883	0.129961	0.995616	0.994575	0.150953	0.711024	0.307988	1.1003	0.0724546	0	0	0	0	1	0
FBtr0072450	CG30429	0.905928	0.381492	-0.106913	0.88925	0.0153827	0.987844	1.09967	0.0934227	0	0	0	0	1	0
FBtr0080224	CG31867	0.269489	0.837917	0.317559	0.451019	0.232803	0.61759	1.09917	0.0163288	0	0	0	0	1	0
FBtr0070200	CG14626	0.46384	0.749759	-0.745776	0.234724	0.857158	0.212771	1.0987	0.0602046	0	0	0	0	1	0
FBtr0076172	CG11726	0.0499587	0.996486	0.118471	0.876988	-0.441665	0.554598	1.09774	0.0931335	0	0	0	0	1	0
FBtr0084902	CG5024	0.0417053	0.996486	0.127479	0.872544	-0.435254	0.574122	1.09751	0.102977	0	0	0	0	1	0
FBtr0080735	CG4161	-0.175146	0.995616	0.35679	0.607404	-0.0385466	0.969753	1.09716	0.0935624	0	0	0	0	1	0
FBtr0077947	CG5561	0.274627	0.915334	0.573321	0.296723	-0.0351882	0.964827	1.0967	0.0409764	0	0	0	0	1	0
FBtr0076457	aay	-0.0115789	0.998044	-0.164602	0.766569	0.870382	0.161884	1.09663	0.0364228	0	0	0	0	1	0
FBtr0100006	CG33965	1.28824	0.0931092	0.606735	0.31154	0.821968	0.220682	1.09482	0.0558437	1	0	0	0	1	0
FBtr0081829	CG11671	0.656253	0.60177	1.32566	0.0960316	1.11705	0.168901	1.09362	0.0914159	0	1	0	0	1	0
FBtr0079699	Dh31	-0.13351	0.995616	0.363367	0.62298	1.07321	0.20672	1.09303	0.110576	0	0	0	0	1	0
FBtr0070673	Cg12685	-0.214074	0.995423	-0.00927804	0.991763	0.827305	0.312724	1.09283	0.115882	0	0	0	0	1	0
FBtr0073353	CG13704	0.347303	0.796266	0.315541	0.515547	0.684358	0.221588	1.09019	0.0307432	0	0	0	0	1	0
FBtr0087868	nemy	0.792449	0.30358	0.255483	0.644241	0.869893	0.176507	1.08884	0.0449354	0	0	0	0	1	0
FBtr0075123	CG7341	-0.23088	0.977513	0.772942	0.266387	1.09585	0.169115	1.0888	0.0889324	0	0	0	0	1	0
FBtr0088355	CG12901	-0.245353	0.797951	-0.151148	0.675948	0.158069	0.693717	1.08845	0.00725128	0	0	0	0	1	0
FBtr0077522	CG31776	-0.432927	0.725526	-0.245503	0.655661	0.336948	0.56551	1.08716	0.0435257	0	0	0	0	1	0
FBtr0077722	CG2964	0.320596	0.842795	0.487514	0.34644	0.475613	0.389676	1.08687	0.0362689	0	0	0	0	1	0
FBtr0084241	CG5388	-0.00561974	0.99897	0.0308268	0.951004	-0.0458884	0.938882	1.08445	0.0166837	0	0	0	0	1	0
FBtr0087869	nemy	0.880014	0.290548	0.376803	0.525446	0.840816	0.21834	1.08441	0.0616395	0	0	0	0	1	0
FBtr0080934	LSm7	0.508555	0.779044	1.20753	0.124125	1.19175	0.15257	1.0824	0.0990917	0	1	0	0	1	0
FBtr0075770	CG6661	-0.548889	0.723158	1.34025	0.0925403	-0.242052	0.769598	1.082	0.0937843	0	1	0	0	1	0
FBtr0080684	CG4480	-0.131677	0.995616	-0.0522698	0.932966	-0.232243	0.70115	1.08173	0.0411622	0	0	0	0	1	0
FBtr0073636	CG15734	0.130686	0.995616	0.340715	0.544795	0.0658951	0.933533	1.0815	0.0513725	0	0	0	0	1	0
FBtr0080091	CG6094	-0.0918056	0.995616	0.513073	0.432256	0.644869	0.363476	1.08093	0.0848414	0	0	0	0	1	0
FBtr0078640	glob3	-0.379706	0.836943	-0.0846897	0.900257	0.00998168	0.991093	1.07998	0.0627886	0	0	0	0	1	0
FBtr0072856	mu2	0.0752902	0.995616	0.205594	0.726585	0.291044	0.641349	1.07757	0.0511767	0	0	0	0	1	0
FBtr0083756	CG18493	0.461727	0.674256	-0.097229	0.868318	0.387003	0.491532	1.07713	0.041367	0	0	0	0	1	0
FBtr0075056	HipHop	-0.386899	0.773017	0.306617	0.556272	0.0229153	0.976693	1.0767	0.0409253	0	0	0	0	1	0
FBtr0085628	CG15536	-0.402955	0.900641	0.281273	0.716587	1.06388	0.212287	1.07615	0.119483	0	0	0	0	1	0
FBtr0083169	CG12784	-0.00126956	0.999741	0.132942	0.851005	0.368579	0.60134	1.07477	0.0818795	0	0	0	0	1	0
FBtr0082821	Adgf-C	0.527586	0.649098	0.915889	0.15138	0.588589	0.354475	1.07398	0.0597884	0	0	0	0	1	0
FBtr0071411	CG32694	0.604044	0.520477	0.119083	0.84732	0.44295	0.461369	1.07269	0.0527453	0	0	0	0	1	0
FBtr0088447	Mef2	0.0236852	0.996486	-0.343569	0.490461	0.76872	0.193673	1.07171	0.0359836	0	0	0	0	1	0
FBtr0072757	CG33230	0.0521442	0.995616	-0.0450769	0.948836	0.654135	0.313066	1.06861	0.0628225	0	0	0	0	1	0
FBtr0079604	CG14274	0.0922775	0.995616	-0.148948	0.79814	0.374996	0.51278	1.06826	0.0445855	0	0	0	0	1	0
FBtr0085450	Obp99a	1.31024	0.174155	1.18343	0.139317	0.518663	0.503945	1.06727	0.113319	0	1	0	0	1	0
FBtr0075146	CG32192	-0.0804212	0.995616	-0.0636294	0.914663	-0.243136	0.675773	1.06644	0.0393918	0	0	0	0	1	0
FBtr0074255	Tob	0.0842516	0.995616	0.3528	0.530958	0.121288	0.872838	1.06469	0.0544537	0	0	0	0	1	0
FBtr0070050	CG32819	0.361908	0.933383	0.892449	0.264705	-0.0439453	0.969256	1.06432	0.135308	0	0	0	0	1	0
FBtr0088657	Tom7	-0.0641252	0.995616	-0.242099	0.758818	0.956687	0.249673	1.06394	0.120542	0	0	0	0	1	0
FBtr0077590	CG8840	0.00108163	0.999833	0.333451	0.682747	-0.668425	0.43112	1.06318	0.145953	0	0	0	0	1	0
FBtr0072123	CG5539	0.2447	0.948212	0.169966	0.782604	0.0906177	0.906965	1.06172	0.0562501	0	0	0	0	1	0
FBtr0079700	Dh31	-0.196781	0.995616	0.307742	0.687621	1.16513	0.183589	1.06062	0.124161	0	0	0	0	1	0
FBtr0084420	CG10170	0.491809	0.607541	0.515984	0.325019	0.183032	0.769957	1.06022	0.0409764	0	0	0	0	1	0
FBtr0079201	CG9222	0.442288	0.797951	0.228356	0.729343	-0.397634	0.560129	1.06021	0.07824	0	0	0	0	1	0
FBtr0080928	CG13283	1.05736	0.261475	0.434833	0.526054	-0.0321975	0.974973	1.059	0.103247	0	0	0	0	1	0
FBtr0086339	CG10822	0.182979	0.976335	0.179927	0.750313	0.0365338	0.963226	1.05886	0.044493	0	0	0	0	1	0
FBtr0082657	CG5724	-0.945458	0.22567	-1.1668	0.087137	-0.195445	0.784619	1.05831	0.0614148	0	-1	0	0	1	0
FBtr0079594	CG8349	0.566129	0.503466	0.382964	0.451545	0.357782	0.516733	1.05596	0.0409764	0	0	0	0	1	0
FBtr0087578	mRpS16	0.462285	0.829663	0.558312	0.432503	1.02719	0.211918	1.05566	0.113069	0	0	0	0	1	0
FBtr0072507	ttm2	-0.469799	0.792282	0.349454	0.594989	-0.211036	0.795082	1.05475	0.0913019	0	0	0	0	1	0
FBtr0076585	Mcm7	-0.413762	0.676326	0.252486	0.594989	-0.191905	0.728495	1.05402	0.03085	0	0	0	0	1	0
FBtr0083546	CG14316	-0.0144693	0.998597	0.484319	0.500501	-0.495683	0.527274	1.0538	0.119147	0	0	0	0	1	0
FBtr0086519	CG11961	0.291493	0.909362	-0.2527	0.658268	0.500132	0.406194	1.052	0.0547991	0	0	0	0	1	0
FBtr0076860	tap66a	0.141698	0.995423	0.279795	0.586397	0.00684365	0.992764	1.05164	0.0414027	0	0	0	0	1	0
FBtr0076602	CG7081	0.15918	0.994356	0.452642	0.405876	0.786892	0.208666	1.05151	0.0499697	0	0	0	0	1	0
FBtr0083163	CG31446	0.873985	0.293644	0.565576	0.346784	0.714222	0.279919	1.05006	0.0680097	0	0	0	0	1	0
FBtr0085133	CG6074	1.05455	0.0946873	0.0764795	0.886587	0.649626	0.236344	1.05003	0.0332755	1	0	0	0	1	0
FBtr0080732	ms(2)35Ci	0.154135	0.995616	0.124797	0.855473	0.0249945	0.979325	1.04885	0.0787045	0	0	0	0	1	0
FBtr0091918	CG33914	-0.573549	0.676326	-0.157744	0.825471	0.650554	0.359918	1.04863	0.092882	0	0	0	0	1	0
FBtr0082623	CG4860	0.91616	0.348962	1.65444	0.0464914	1.10448	0.16648	1.04834	0.0980568	0	1	0	0	1	0
FBtr0079818	borr	-0.524123	0.408044	0.497766	0.249672	0.0798822	0.887694	1.04818	0.0180849	0	0	0	0	1	0
FBtr0073999	CG5662	0.0635723	0.995616	0.728056	0.304207	0.168243	0.850554	1.04748	0.106377	0	0	0	0	1	0
FBtr0072425	Orc4	-0.720581	0.234505	0.449107	0.325101	0.0805705	0.894375	1.04608	0.0259559	0	0	0	0	1	0
FBtr0086341	CG13872	9.99533e-05	0.999833	0.591803	0.177782	-0.224456	0.615747	1.04556	0.016912	0	0	0	0	1	0
FBtr0088397	CG2249	0.343146	0.938169	0.0236738	0.978937	0.661731	0.40859	1.04219	0.130907	0	0	0	0	1	0
FBtr0083816	CG4686	0.237382	0.972012	1.52734	0.0524681	0.926484	0.213622	1.04159	0.0917877	0	1	0	0	1	0
FBtr0076171	CG7573	0.801517	0.385242	0.439318	0.46878	-0.188821	0.806062	1.03884	0.077732	0	0	0	0	1	0
FBtr0087773	CG15870	-0.718407	0.575973	-0.21957	0.777121	0.716862	0.358419	1.03768	0.12092	0	0	0	0	1	0
FBtr0079029	CG14036	-0.0237028	0.996486	0.886626	0.150374	0.731517	0.250922	1.03744	0.0593101	0	0	0	0	1	0
FBtr0075506	CG12713	-0.947045	0.140474	0.146478	0.781238	-0.0540972	0.937458	1.03537	0.0365552	-1	0	0	0	1	0
FBtr0083480	CG31360	-0.137789	0.995616	0.786247	0.306419	1.15967	0.190019	1.03504	0.135812	0	0	0	0	1	0
FBtr0077976	CG5156	-2.10113	0.00272962	0.11983	0.810583	-0.876354	0.115198	1.03495	0.028819	-1	0	0	-1	1	0
FBtr0088802	CG2291	0.123285	0.995616	0.285606	0.677595	-0.488582	0.493087	1.03434	0.100672	0	0	0	0	1	0
FBtr0088675	CG13745	0.684951	0.441149	1.39283	0.0478008	-0.393434	0.521292	1.03354	0.0620942	0	1	0	0	1	0
FBtr0072051	yip3	0.0669542	0.995616	0.26091	0.73759	0.933785	0.260428	1.0331	0.129284	0	0	0	0	1	0
FBtr0085388	CG11898	-0.298658	0.952133	-0.293018	0.69593	-0.0478554	0.96489	1.03204	0.126818	0	0	0	0	1	0
FBtr0086663	CG18107	-0.817861	0.436204	-0.0860322	0.912239	-0.0681075	0.94376	1.03054	0.104285	0	0	0	0	1	0
FBtr0076089	Tim13	0.0362901	0.996486	0.535074	0.387862	0.39009	0.56007	1.03049	0.0803782	0	0	0	0	1	0
FBtr0082083	nmdyn-D7	-0.752349	0.191208	0.524117	0.247496	0.259152	0.584342	1.02938	0.0241955	0	0	0	0	1	0
FBtr0082682	CG17207	-0.00172366	0.999741	0.357896	0.562015	0.0435451	0.962414	1.02903	0.0818795	0	0	0	0	1	0
FBtr0078578	CG32459	0.0689272	0.995616	0.0430837	0.949261	-0.238446	0.718075	1.02785	0.0633127	0	0	0	0	1	0
FBtr0081225	CG17564	-0.116738	0.995616	0.0933746	0.899459	-0.377832	0.595931	1.02562	0.0984264	0	0	0	0	1	0
FBtr0084826	CG13658	0.875436	0.384388	0.763243	0.2708	0.964625	0.21119	1.02538	0.103803	0	0	0	0	1	0
FBtr0083646	fru	0.163863	0.995616	0.341371	0.657084	0.410181	0.621504	1.02534	0.140131	0	0	0	0	1	0
FBtr0078982	TwdlG	0.369077	0.697891	-0.462624	0.302947	-0.0937793	0.872907	1.02532	0.0254539	0	0	0	0	1	0
FBtr0088871	CG11198	0.05845	0.995616	0.0623274	0.907852	0.0441373	0.948442	1.02444	0.0328961	0	0	0	0	1	0
FBtr0076041	CG7252	-0.0115961	0.998597	1.06408	0.102618	0.284042	0.652552	1.0241	0.0614148	0	1	0	0	1	0
FBtr0074105	CG15914	-0.396134	0.601389	0.4971	0.245222	0.40403	0.362444	1.0235	0.0189794	0	0	0	0	1	0
FBtr0089691	CG14736	-0.0826107	0.995616	0.0690393	0.862586	0.283075	0.461369	1.02191	0.0111765	0	0	0	0	1	0
FBtr0086622	Jheh3	0.123345	0.995616	0.245252	0.62999	0.440108	0.416221	1.02182	0.0428055	0	0	0	0	1	0
FBtr0086781	CG17680	-0.0704622	0.995616	0.000718875	0.999399	0.695893	0.327103	1.02058	0.100265	0	0	0	0	1	0
FBtr0072693	FucTD	0.0317451	0.996486	0.105254	0.845312	0.319266	0.548096	1.01928	0.0397948	0	0	0	0	1	0
FBtr0080147	CG16743	0.308406	0.876377	-1.06255	0.0878506	0.739626	0.222964	1.01667	0.0519025	0	-1	0	0	1	0
FBtr0085409	Slbp	-0.45549	0.510221	0.500941	0.25219	0.238801	0.603421	1.01662	0.0220557	0	0	0	0	1	0
FBtr0075644	CG6888	0.13494	0.995616	0.210608	0.724959	-0.392497	0.52411	1.0162	0.0665382	0	0	0	0	1	0
FBtr0088974	CG11125	-0.655632	0.624354	0.681205	0.33707	-0.118956	0.900054	1.01612	0.119149	0	0	0	0	1	0
FBtr0084279	CG33107	-0.473813	0.625033	0.38713	0.442402	0.782466	0.190145	1.01605	0.044493	0	0	0	0	1	0
FBtr0075220	CG7603	0.0885031	0.995616	-0.14271	0.830906	0.832049	0.231617	1.01584	0.081691	0	0	0	0	1	0
FBtr0075049	MYPT-75D	-0.0521384	0.995616	-0.125926	0.843483	0.787091	0.232604	1.01447	0.0701171	0	0	0	0	1	0
FBtr0088175	CG18336	-0.292971	0.882639	0.572033	0.279229	0.792	0.190019	1.01293	0.0464511	0	0	0	0	1	0
FBtr0085440	CG2014	0.124337	0.995616	0.0761081	0.914773	0.806684	0.245121	1.01229	0.0842	0	0	0	0	1	0
FBtr0080815	CG4891	0.224425	0.964291	0.251434	0.677198	-0.143202	0.849893	1.01191	0.0734297	0	0	0	0	1	0
FBtr0075665	CG12310	-0.495824	0.794312	-0.262304	0.717387	1.00301	0.210323	1.01114	0.118022	0	0	0	0	1	0
FBtr0084559	cav	-0.303313	0.917314	0.133488	0.839045	0.472491	0.458	1.00877	0.0776855	0	0	0	0	1	0
FBtr0085011	Hex-t2	0.41291	0.880653	0.302252	0.683206	-0.580144	0.451786	1.00808	0.130565	0	0	0	0	1	0
FBtr0087767	CG30058	-0.512238	0.806415	0.209623	0.796494	-0.112108	0.912751	1.0071	0.144188	0	0	0	0	1	0
FBtr0071773	CG11291	-0.0607923	0.995616	-0.00323895	0.995448	0.145127	0.822684	1.00483	0.0488866	0	0	0	0	1	0
FBtr0070031	CG15323	-0.178519	0.962688	0.0258156	0.963464	0.741033	0.173565	1.00476	0.033208	0	0	0	0	1	0
FBtr0072990	CG16753	0.0450888	0.996486	0.476264	0.469254	0.656495	0.362444	1.00357	0.107301	0	0	0	0	1	0
FBtr0082933	spn-B	-0.909233	0.0711482	0.276319	0.465902	0.103663	0.830537	1.00296	0.0158634	-1	0	0	0	1	0
FBtr0072071	CG5398	-0.201556	0.972012	0.0838291	0.891375	-0.28973	0.636579	1.00245	0.0615652	0	0	0	0	1	0
FBtr0088799	CG30375	0.507457	0.607474	0.063754	0.918137	0.596264	0.30697	1.00092	0.0544174	0	0	0	0	1	0
FBtr0080448	Prosalpha6T	0.17159	0.961208	0.0423311	0.935677	-0.0138776	0.984307	0.999356	0.029057	0	0	0	0	1	0
FBtr0071930	CG30219	0.840403	0.364516	0.271735	0.672091	0.803978	0.254724	0.998492	0.0928605	0	0	0	0	1	0
FBtr0072294	CG3492	0.0376862	0.996486	0.289588	0.566174	0.66969	0.244022	0.998426	0.046837	0	0	0	0	1	0
FBtr0077520	Pdsw	0.728104	0.489065	0.317192	0.624456	0.653131	0.350259	0.996056	0.100672	0	0	0	0	1	0
FBtr0070697	Cg12684	-0.0815051	0.995616	0.842925	0.233673	0.18768	0.825963	0.995925	0.114075	0	0	0	0	1	0
FBtr0071635	CG15657	-0.851258	0.323113	-0.275709	0.653823	0.335791	0.610367	0.995459	0.0835907	0	0	0	0	1	0
FBtr0077583	CG8837	0.0918526	0.995616	0.519813	0.428827	0.925123	0.221321	0.994651	0.107464	0	0	0	0	1	0
FBtr0080543	Orc5	-0.596649	0.512859	0.245553	0.664132	0.0585586	0.940725	0.994201	0.0642048	0	0	0	0	1	0
FBtr0086299	CG11200	0.786335	0.273441	0.0691681	0.907852	0.210286	0.72915	0.994065	0.0522093	0	0	0	0	1	0
FBtr0086231	CG11110	0.424173	0.825285	1.63668	0.0432599	1.07224	0.167568	0.993965	0.104291	0	1	0	0	1	0
FBtr0073432	CG1961	-0.0939977	0.995616	-0.150147	0.834571	0.144365	0.867034	0.993633	0.104958	0	0	0	0	1	0
FBtr0086997	CG10953	-0.342939	0.933383	-0.00423226	0.995614	-1.82997	0.0486034	0.992528	0.141085	0	0	0	-1	1	0
FBtr0078737	CG31546	-0.004139	0.999741	-0.00606714	0.991763	0.507267	0.356487	0.99239	0.0479446	0	0	0	0	1	0
FBtr0081697	agt	-0.582563	0.425093	0.177476	0.71985	0.161843	0.780911	0.989095	0.0389001	0	0	0	0	1	0
FBtr0077801	CG17237	0.173553	0.942474	0.106771	0.800999	0.122481	0.798835	0.989066	0.0172305	0	0	0	0	1	0
FBtr0072185	RpL39	-0.0575641	0.995616	-0.388753	0.486957	0.646404	0.299442	0.988296	0.0701004	0	0	0	0	1	0
FBtr0083849	CG4459	0.836752	0.288207	0.950612	0.13362	0.856691	0.194947	0.987801	0.0706212	0	1	0	0	1	0
FBtr0070233	CG3719	0.143899	0.995423	0.146481	0.791899	0.69518	0.233383	0.987783	0.0507186	0	0	0	0	1	0
FBtr0083922	cdc2c	-0.592919	0.457393	0.0471538	0.93707	0.377995	0.482834	0.986486	0.0477743	0	0	0	0	1	0
FBtr0085571	CG9743	0.224827	0.950163	-0.262005	0.62274	0.329721	0.566165	0.986437	0.0559812	0	0	0	0	1	0
FBtr0074024	CG9101	0.571795	0.48457	0.642672	0.222641	0.528419	0.33023	0.985989	0.0471557	0	0	0	0	1	0
FBtr0089183	CG32013	0.264744	0.971388	0.372554	0.607129	0.664565	0.390964	0.985594	0.137705	0	0	0	0	1	0
FBtr0073157	Fie	0.0392185	0.995718	-0.397142	0.410732	0.620002	0.255732	0.983358	0.0421692	0	0	0	0	1	0
FBtr0084428	CG17380	-0.31528	0.904493	0.0132037	0.984986	-0.103884	0.896715	0.982736	0.0818795	0	0	0	0	1	0
FBtr0071999	CG3092	0.207101	0.931225	0.105254	0.824253	-0.039173	0.950457	0.982648	0.0286767	0	0	0	0	1	0
FBtr0079487	CG7164	-0.0856703	0.995616	0.736522	0.315875	-0.397062	0.615483	0.98256	0.139173	0	0	0	0	1	0
FBtr0070659	CG15578	-0.00918145	0.99897	0.320267	0.62727	0.865401	0.243611	0.978474	0.10934	0	0	0	0	1	0
FBtr0086134	CG9436	0.731014	0.380365	1.22765	0.0661114	0.319053	0.598785	0.978172	0.0692212	0	1	0	0	1	0
FBtr0079798	CG17005	0.582562	0.29417	-0.180751	0.65504	0.221562	0.60916	0.974998	0.0202439	0	0	0	0	1	0
FBtr0080059	RnrL	-0.238314	0.965778	-0.285189	0.658219	-0.0832962	0.923405	0.974547	0.10146	0	0	0	0	1	0
FBtr0089690	CG14736	0.0543135	0.995616	0.377954	0.439618	0.246887	0.655176	0.974465	0.046119	0	0	0	0	1	0
FBtr0087982	CG18343	-0.605591	0.678526	0.784681	0.277293	0.472835	0.531646	0.973418	0.132924	0	0	0	0	1	0
FBtr0087388	Pms2	-0.779225	0.194586	0.695334	0.158406	0.0597279	0.923618	0.972546	0.0346252	0	0	0	0	1	0
FBtr0079286	CG9550	0.240382	0.967651	0.485351	0.446491	-0.108369	0.900514	0.971352	0.106561	0	0	0	0	1	0
FBtr0074818	CG14185	0.0424255	0.996486	0.431593	0.502876	0.71977	0.314125	0.970755	0.110275	0	0	0	0	1	0
FBtr0087652	CG12464	0.0900796	0.995616	0.196662	0.693614	0.431071	0.408511	0.968541	0.044787	0	0	0	0	1	0
FBtr0075059	CG32027	-0.724541	0.505726	-0.425556	0.516821	0.098624	0.913274	0.967926	0.116269	0	0	0	0	1	0
FBtr0077332	CG12679	0.337108	0.907844	0.698773	0.290327	0.258057	0.730361	0.967394	0.107193	0	0	0	0	1	0
FBtr0081583	nxf4	0.122854	0.995616	0.0879339	0.896783	-0.347573	0.59576	0.966164	0.09129	0	0	0	0	1	0
FBtr0081277	CG10165	-0.0254474	0.996486	-0.381142	0.469748	0.46054	0.421146	0.965922	0.0629282	0	0	0	0	1	0
FBtr0075400	CG13033	0.0459652	0.996486	0.546842	0.408204	0.517187	0.462948	0.965061	0.117203	0	0	0	0	1	0
FBtr0078397	CG5664	-0.409967	0.805412	0.178386	0.781848	0.0935934	0.908688	0.964967	0.0895247	0	0	0	0	1	0
FBtr0074076	CG15642	-0.665609	0.596273	1.38993	0.0849713	0.968754	0.217119	0.964516	0.128872	0	1	0	0	1	0
FBtr0080931	CG13280	0.135807	0.963185	-0.01039	0.979566	-0.040722	0.934109	0.964489	0.0128983	0	0	0	0	1	0
FBtr0100167	tgy	0.119417	0.995616	0.107002	0.887551	0.253928	0.75651	0.964277	0.127815	0	0	0	0	1	0
FBtr0100076	CG34021	0.141221	0.995616	0.646472	0.266387	-0.041917	0.959789	0.964012	0.0744007	0	0	0	0	1	0
FBtr0081033	CG5755	-0.366845	0.895152	-0.0361249	0.964976	-0.479725	0.500182	0.963445	0.119147	0	0	0	0	1	0
FBtr0080952	CG31806	-0.0632527	0.995616	0.16845	0.756959	-0.139477	0.82807	0.962237	0.0538488	0	0	0	0	1	0
FBtr0081859	CG11694	0.173138	0.960629	0.277512	0.528672	0.432936	0.365607	0.961124	0.0333514	0	0	0	0	1	0
FBtr0083744	CG11703	0.0010035	0.999741	0.125344	0.792322	-0.479078	0.31972	0.959764	0.0328793	0	0	0	0	1	0
FBtr0078534	CG14448	0.133025	0.995616	0.312443	0.568128	-0.192486	0.774786	0.958585	0.0710076	0	0	0	0	1	0
FBtr0088746	Cyp4e1	-0.62598	0.462475	-0.466294	0.385994	-0.530577	0.359268	0.957905	0.0647029	0	0	0	0	1	0
FBtr0081737	SmD2	0.0317466	0.996486	0.357737	0.478824	0.835827	0.168901	0.956801	0.0554404	0	0	0	0	1	0
FBtr0082559	CG10014	0.317554	0.934923	0.523793	0.438484	-0.249421	0.760779	0.9566	0.129284	0	0	0	0	1	0
FBtr0081404	phr6-4	-0.707656	0.496957	0.338339	0.594989	0.288139	0.691352	0.956259	0.107457	0	0	0	0	1	0
FBtr0079894	CG5853	0.998467	0.139919	0.232662	0.657422	0.406982	0.458	0.95424	0.056976	1	0	0	0	1	0
FBtr0073288	mRpS6	0.48984	0.758983	1.52185	0.0522707	0.642471	0.358419	0.953726	0.112187	0	1	0	0	1	0
FBtr0085733	Aph-4	0.20996	0.987241	-0.131959	0.859074	0.831909	0.270241	0.953179	0.127437	0	0	0	0	1	0
FBtr0077952	ast	-0.203252	0.979589	0.555348	0.359725	0.347405	0.595379	0.952913	0.0941933	0	0	0	0	1	0
FBtr0073658	CG1824	-0.045859	0.996486	0.20023	0.786351	-0.348479	0.649917	0.950912	0.132794	0	0	0	0	1	0
FBtr0086002	CG30432	-0.132359	0.985392	-0.125578	0.77985	-0.0984299	0.854163	0.949621	0.0282978	0	0	0	0	1	0
FBtr0087866	CG8776	0.743853	0.424954	0.309256	0.611593	0.806344	0.2396	0.949502	0.0974005	0	0	0	0	1	0
FBtr0073943	CG9413	0.397204	0.580853	-0.488907	0.241846	0.270525	0.531412	0.948142	0.0242203	0	0	0	0	1	0
FBtr0079048	CG8891	0.386423	0.865721	0.851503	0.21543	0.773466	0.287051	0.947986	0.118359	0	0	0	0	1	0
FBtr0080911	Ugt36Bc	0.0148702	0.998025	-0.643668	0.302226	-0.323129	0.63194	0.945851	0.100087	0	0	0	0	1	0
FBtr0081682	CG31286	-0.282117	0.931225	-0.320141	0.586356	-0.644982	0.317736	0.945472	0.0913019	0	0	0	0	1	0
FBtr0079127	tomb	-1.27024	0.0874915	0.594015	0.307338	-0.362362	0.557076	0.94467	0.0818795	-1	0	0	0	1	0
FBtr0080746	UK114	0.296973	0.886465	-0.0122661	0.984683	0.522142	0.359268	0.944648	0.0642048	0	0	0	0	1	0
FBtr0079146	Gpdh	0.0988884	0.995616	-0.448038	0.448902	0.256881	0.708138	0.944503	0.0954274	0	0	0	0	1	0
FBtr0077369	CG14615	0.0827634	0.995616	0.489711	0.446576	0.0353676	0.970618	0.94427	0.118163	0	0	0	0	1	0
FBtr0078382	CG7181	0.518436	0.732586	-0.598642	0.362693	0.612209	0.383395	0.943212	0.119147	0	0	0	0	1	0
FBtr0085132	gb	-0.253665	0.904493	-0.208705	0.667773	0.587375	0.269661	0.942815	0.0458448	0	0	0	0	1	0
FBtr0075391	st	0.324322	0.797217	0.0241532	0.966215	0.176005	0.746635	0.942524	0.0409764	0	0	0	0	1	0
FBtr0084401	CG4624	0.962546	0.169083	0.529322	0.32315	0.447389	0.426393	0.942295	0.0648702	0	0	0	0	1	0
FBtr0082078	SpdS	0.611838	0.676326	1.00567	0.181361	0.807609	0.297569	0.941907	0.145299	0	0	0	0	1	0
FBtr0082403	RpL24-like	-0.0177475	0.997933	0.245474	0.684854	0.604214	0.344906	0.941302	0.0918393	0	0	0	0	1	0
FBtr0070787	CG15780	0.497881	0.785976	0.265909	0.710449	0.537658	0.463374	0.940843	0.138239	0	0	0	0	1	0
FBtr0074073	Ac13E	0.454618	0.831759	-0.447139	0.524136	1.209	0.153731	0.940439	0.148507	0	0	0	0	1	0
FBtr0082626	desat1	-0.0937928	0.995616	-0.458866	0.350048	0.325718	0.533703	0.939165	0.0500988	0	0	0	0	1	0
FBtr0086289	CG16741	0.141027	0.995616	0.655261	0.272525	0.0585995	0.943294	0.938693	0.0878818	0	0	0	0	1	0
FBtr0075248	CG13725	0.192967	0.900183	0.244396	0.487496	0.105453	0.812782	0.937499	0.0154932	0	0	0	0	1	0
FBtr0083247	glob1	0.116327	0.995616	0.139163	0.796903	0.348855	0.51278	0.936995	0.0541617	0	0	0	0	1	0
FBtr0076176	CG7551	-0.0508866	0.995616	0.154104	0.78707	-0.344385	0.546738	0.936958	0.0669332	0	0	0	0	1	0
FBtr0082617	Cyp313a3	-0.571901	0.574937	-0.261711	0.653405	-0.23002	0.729767	0.93564	0.0860283	0	0	0	0	1	0
FBtr0082380	CG6629	-0.205255	0.965672	0.194684	0.734447	-0.562303	0.341068	0.934241	0.0741207	0	0	0	0	1	0
FBtr0076905	CG14823	0.730797	0.541282	0.894661	0.223456	0.568374	0.447564	0.932688	0.148504	0	0	0	0	1	0
FBtr0081140	CG15172	0.111038	0.995423	-0.0433078	0.928092	0.0257635	0.966028	0.932632	0.0281671	0	0	0	0	1	0
FBtr0079779	CG9573	0.323677	0.81765	1.66778	0.00986686	0.216904	0.695541	0.931719	0.0509012	0	1	0	0	1	0
FBtr0079350	CG3430	-0.809319	0.353066	-0.347569	0.556351	-0.539478	0.398151	0.930353	0.0979894	0	0	0	0	1	0
FBtr0080743	CG15258	-0.0572547	0.995616	0.0321942	0.956966	0.0775162	0.910386	0.929068	0.0577118	0	0	0	0	1	0
FBtr0078354	CG7529	0.654682	0.490091	-0.0980927	0.878345	-0.293834	0.650625	0.928847	0.09145	0	0	0	0	1	0
FBtr0085784	gskt	0.269273	0.959787	0.434788	0.519656	-0.293259	0.707394	0.928518	0.138525	0	0	0	0	1	0
FBtr0080227	CG14921	0.559131	0.585655	1.29289	0.0584309	0.558228	0.362339	0.928049	0.0858644	0	1	0	0	1	0
FBtr0081533	CG10113	0.199066	0.97354	0.437908	0.428823	-0.705191	0.26066	0.928003	0.0814028	0	0	0	0	1	0
FBtr0080843	mRpL4	0.198177	0.97354	0.139329	0.81677	0.72445	0.245421	0.927115	0.0795496	0	0	0	0	1	0
FBtr0079121	CG14013	0.0396303	0.995616	0.357499	0.358029	-0.718665	0.124346	0.926539	0.022365	0	0	0	-1	1	0
FBtr0081381	CG15475	-0.376153	0.859764	0.72285	0.265082	-0.173804	0.82569	0.926537	0.111952	0	0	0	0	1	0
FBtr0078425	CG32445	0.411784	0.798895	0.320344	0.587805	-0.161574	0.828274	0.925048	0.0987997	0	0	0	0	1	0
FBtr0077914	RFeSP	0.537809	0.680041	0.0529264	0.94268	0.74007	0.286833	0.924459	0.111536	0	0	0	0	1	0
FBtr0083006	RpS5b	0.0172823	0.997933	0.28557	0.617052	0.710504	0.264803	0.924026	0.0877095	0	0	0	0	1	0
FBtr0088469	dap	-0.589286	0.613503	0.322782	0.606969	0.42541	0.526708	0.923093	0.111711	0	0	0	0	1	0
FBtr0073090	CG14968	0.0299316	0.996486	0.193696	0.680414	0.230278	0.652552	0.922819	0.0430604	0	0	0	0	1	0
FBtr0082234	CG18545	0.760391	0.24953	0.33769	0.481212	0.624319	0.252827	0.921008	0.0527626	0	0	0	0	1	0
FBtr0071140	CG18624	0.212258	0.985322	-0.242869	0.72886	0.828934	0.268157	0.919746	0.135547	0	0	0	0	1	0
FBtr0080256	CG14931	-0.0702499	0.995616	0.38713	0.391839	-0.387392	0.421211	0.919252	0.0414727	0	0	0	0	1	0
FBtr0084976	Dak1	0.0498577	0.995616	0.353502	0.514237	0.136797	0.845136	0.919097	0.0789611	0	0	0	0	1	0
FBtr0086750	nopo	-0.650847	0.313428	0.0133858	0.979566	0.256049	0.605833	0.918254	0.0433012	0	0	0	0	1	0
FBtr0079535	baf	0.195753	0.984586	0.463542	0.436699	0.963688	0.172814	0.917067	0.104058	0	0	0	0	1	0
FBtr0073493	CG15196	-0.0176977	0.996486	0.637891	0.165877	-0.0337671	0.957223	0.916659	0.0341008	0	0	0	0	1	0
FBtr0084536	CG5991	0.250258	0.927634	0.107059	0.84895	0.344469	0.533703	0.916573	0.065586	0	0	0	0	1	0
FBtr0083404	CG31267	0.923676	0.249608	0.669115	0.272598	0.287419	0.666447	0.915248	0.10063	0	0	0	0	1	0
FBtr0089390	Ptx1	0.152932	0.995616	-0.45088	0.502876	0.547183	0.452496	0.913472	0.145406	0	0	0	0	1	0
FBtr0087349	CG8204	-0.18244	0.995423	0.0898764	0.905765	1.0902	0.168901	0.912139	0.137509	0	0	0	0	1	0
FBtr0074701	Obp18a	-0.0149545	0.998025	0.10252	0.876988	0.909331	0.193673	0.911802	0.103898	0	0	0	0	1	0
FBtr0070159	CG13364	0.317657	0.904493	0.595092	0.326701	0.763547	0.25785	0.910762	0.104804	0	0	0	0	1	0
FBtr0086983	Amy-d	-0.348067	0.848485	-0.555088	0.33132	0.375765	0.537264	0.908601	0.0909921	0	0	0	0	1	0
FBtr0079973	CG31875	0.238319	0.943332	0.868747	0.140565	0.579909	0.320165	0.905764	0.0773312	0	1	0	0	1	0
FBtr0074853	CG6933	0.10859	0.995616	0.283385	0.628461	0.22684	0.7391	0.904837	0.0996264	0	0	0	0	1	0
FBtr0086269	CG30151	-0.378471	0.891991	-0.853215	0.230735	0.26173	0.744871	0.903746	0.149103	0	0	0	0	1	0
FBtr0072065	CG30184	0.250681	0.955383	0.921355	0.166438	0.400243	0.547897	0.903265	0.115203	0	0	0	0	1	0
FBtr0081099	Grip71	-0.0830982	0.995616	0.636567	0.126826	-0.217457	0.589838	0.902967	0.0210065	0	1	0	0	1	0
FBtr0085737	CG15556	-0.0393518	0.996486	-0.689152	0.299368	0.765507	0.28763	0.900044	0.132513	0	0	0	0	1	0
FBtr0077621	oho23B	0.0750592	0.995616	0.192195	0.691468	0.67507	0.211918	0.899468	0.0513725	0	0	0	0	1	0
FBtr0073966	CG9065	0.40433	0.824526	0.012584	0.98673	0.655875	0.32758	0.898931	0.119147	0	0	0	0	1	0
FBtr0080967	CG31804	0.0368337	0.996486	0.50553	0.359725	0.0403521	0.960228	0.898676	0.0847452	0	0	0	0	1	0
FBtr0078376	CG32441	-0.250535	0.948212	0.0211533	0.976381	0.63721	0.31664	0.897426	0.10096	0	0	0	0	1	0
FBtr0082739	CG8773	0.13451	0.995616	-0.163537	0.76718	-0.0276003	0.971391	0.897054	0.0715746	0	0	0	0	1	0
FBtr0088310	Caf1-105	-1.01537	0.0748002	0.174433	0.696365	-0.958355	0.0759468	0.894042	0.0409764	-1	0	0	-1	1	0
FBtr0073570	SelG	0.178432	0.977513	0.296342	0.565666	0.640291	0.270183	0.893476	0.0734497	0	0	0	0	1	0
FBtr0071594	RpL29	0.0726	0.995616	-0.110689	0.846021	0.664939	0.25705	0.893219	0.074292	0	0	0	0	1	0
FBtr0085215	CG5590	0.447325	0.795568	0.791403	0.229786	0.679312	0.320854	0.892706	0.12523	0	0	0	0	1	0
FBtr0076261	CG32068	-0.110241	0.995616	-0.681597	0.292359	0.667305	0.326891	0.891517	0.126818	0	0	0	0	1	0
FBtr0076698	CG8006	-0.228976	0.959787	0.326964	0.574391	-0.615154	0.33023	0.891212	0.104285	0	0	0	0	1	0
FBtr0088013	Oda	0.159013	0.948212	-0.154952	0.684636	0.597643	0.172066	0.888708	0.0227833	0	0	0	0	1	0
FBtr0078379	capaR	0.137765	0.995616	0.345254	0.545582	0.665003	0.294892	0.887406	0.100672	0	0	0	0	1	0
FBtr0076429	CG4476	-0.748776	0.474807	-0.218981	0.751507	0.974049	0.199031	0.887294	0.137952	0	0	0	0	1	0
FBtr0088863	Odc1	0.799702	0.398128	0.948358	0.162335	0.358527	0.598256	0.885165	0.126818	0	0	0	0	1	0
FBtr0081058	CG31802	-0.509576	0.437332	-0.541801	0.222217	-0.447556	0.326891	0.880517	0.0389909	0	0	0	0	1	0
FBtr0079202	CG13991	0.273615	0.869113	0.169561	0.728707	-0.135303	0.816741	0.880467	0.0536451	0	0	0	0	1	0
FBtr0080602	CG31769	0.207071	0.939076	-0.1919	0.680443	-0.664077	0.205989	0.879562	0.0492598	0	0	0	0	1	0
FBtr0083921	cdc2c	-0.591861	0.425849	-0.0945404	0.858752	0.22922	0.675679	0.878964	0.0609776	0	0	0	0	1	0
FBtr0082546	CG4810	0.377544	0.882639	0.554045	0.404504	-0.33693	0.650335	0.878424	0.14978	0	0	0	0	1	0
FBtr0085265	CG4951	-0.251023	0.840801	0.451953	0.27308	-0.149485	0.753969	0.877833	0.0318354	0	0	0	0	1	0
FBtr0076511	mRpL12	0.312435	0.879348	0.542629	0.325019	0.447631	0.439703	0.877396	0.0889967	0	0	0	0	1	0
FBtr0083007	CG7026	0.167377	0.995423	0.404492	0.477015	0.416755	0.498826	0.876311	0.104804	0	0	0	0	1	0
FBtr0071593	RpL29	0.102507	0.995616	-0.0137405	0.981902	0.592997	0.299334	0.875773	0.0776855	0	0	0	0	1	0
FBtr0079544	MED20	-0.828739	0.37555	0.511877	0.412456	0.924406	0.204117	0.874941	0.131538	0	0	0	0	1	0
FBtr0075602	mex1	-0.448177	0.739649	-1.40725	0.0464914	0.660336	0.29486	0.874498	0.102439	0	-1	0	0	1	0
FBtr0074823	CG17145	0.464646	0.720707	0.273954	0.636379	0.693027	0.277319	0.874273	0.104392	0	0	0	0	1	0
FBtr0070927	CG15892	0.120652	0.995423	0.589633	0.194154	0.39154	0.393039	0.871893	0.041367	0	0	0	0	1	0
FBtr0088661	CG8197	0.123013	0.995616	0.1873	0.728095	-0.0637005	0.928836	0.871142	0.0772949	0	0	0	0	1	0
FBtr0075718	Mpcp	0.0387011	0.996486	-0.486745	0.354524	0.340199	0.545595	0.87032	0.0803782	0	0	0	0	1	0
FBtr0072541	CG13405	0.244046	0.950928	1.22125	0.0773067	-0.584082	0.358419	0.869023	0.111536	0	1	0	0	1	0
FBtr0084325	Tak12	-0.175539	0.991415	0.801305	0.199754	0.256767	0.704044	0.868434	0.113089	0	0	0	0	1	0
FBtr0079804	CG3748	0.284048	0.821187	0.375003	0.385994	0.725626	0.160636	0.867475	0.043425	0	0	0	0	1	0
FBtr0084128	CG31198	0.547237	0.536013	-0.00853066	0.989523	-0.210679	0.728834	0.86653	0.0818795	0	0	0	0	1	0
FBtr0073763	Jafrac1	-0.0801689	0.995616	-0.0687736	0.9055	-0.0602253	0.931894	0.8665	0.0761209	0	0	0	0	1	0
FBtr0079291	CG11050	0.12084	0.995423	0.036553	0.941591	-0.0271182	0.965351	0.865658	0.0409764	0	0	0	0	1	0
FBtr0071714	Grx-1	0.12876	0.985322	-0.0182657	0.971397	-0.217958	0.622498	0.865095	0.034016	0	0	0	0	1	0
FBtr0070115	CG13369	0.0113104	0.998025	-0.137156	0.761403	0.234549	0.610438	0.863014	0.0411488	0	0	0	0	1	0
FBtr0083407	CG5265	-0.000398244	0.999833	0.384098	0.486957	-0.317174	0.602717	0.862612	0.101092	0	0	0	0	1	0
FBtr0084855	CG31087	0.494522	0.48457	-0.214128	0.624456	-0.117615	0.830395	0.861358	0.0458472	0	0	0	0	1	0
FBtr0088237	Rpb5	-0.216588	0.948749	0.840627	0.134158	0.590643	0.292509	0.859302	0.0768795	0	1	0	0	1	0
FBtr0084336	Gclm	0.127165	0.995616	0.489592	0.367342	0.682707	0.26066	0.857701	0.0931335	0	0	0	0	1	0
FBtr0087859	Nacalpha	0.0140582	0.997748	-0.0964689	0.834791	0.520534	0.270241	0.857458	0.0421692	0	0	0	0	1	0
FBtr0087464	CG10202	-0.0484269	0.995616	0.0213408	0.975201	-0.563474	0.341772	0.857332	0.0971794	0	0	0	0	1	0
FBtr0074948	CG9392	-0.194038	0.985119	0.453971	0.444419	-0.437531	0.493723	0.857022	0.123393	0	0	0	0	1	0
FBtr0070040	CG32230	0.219777	0.961171	-0.263921	0.644767	0.467814	0.437646	0.856116	0.105357	0	0	0	0	1	0
FBtr0079805	CG13110	0.194853	0.922973	0.222466	0.570409	0.0242372	0.966855	0.855781	0.033208	0	0	0	0	1	0
FBtr0082215	CG5359	-0.966673	0.147208	-0.370439	0.457818	0.451667	0.40542	0.855767	0.0773312	-1	0	0	0	1	0
FBtr0079378	CG17377	0.356464	0.763359	0.263073	0.577195	0.372316	0.46033	0.855041	0.0630354	0	0	0	0	1	0
FBtr0073637	CG12721	-0.102793	0.995616	0.0255484	0.969488	-0.304329	0.600724	0.852395	0.092407	0	0	0	0	1	0
FBtr0083136	CG31344	0.128292	0.984282	0.802743	0.0826069	-0.303694	0.466698	0.85217	0.033208	0	1	0	0	1	0
FBtr0071855	RpS16	-0.0381759	0.996486	0.365952	0.530639	0.519805	0.409014	0.848552	0.119745	0	0	0	0	1	0
FBtr0087858	Nacalpha	-0.0752447	0.995616	0.0774015	0.865682	0.553652	0.237182	0.848523	0.0409764	0	0	0	0	1	0
FBtr0072621	CG9205	0.177613	0.985322	0.852858	0.158104	0.478526	0.421211	0.848035	0.104285	0	0	0	0	1	0
FBtr0084713	CG10845	0.202842	0.959787	-0.0728203	0.901063	-0.449172	0.41851	0.847803	0.0857889	0	0	0	0	1	0
FBtr0085414	dgt6	-0.420038	0.503466	0.549692	0.17957	0.138668	0.762475	0.847735	0.0307432	0	0	0	0	1	0
FBtr0087132	CG3687	-0.666297	0.320653	-0.410922	0.385625	0.357226	0.477702	0.847239	0.0639262	0	0	0	0	1	0
FBtr0080726	CG31832	-0.29583	0.931225	0.248563	0.695964	-0.116082	0.890391	0.843564	0.138745	0	0	0	0	1	0
FBtr0072085	l(2)dtl	-0.475272	0.75458	-0.00757492	0.991763	-0.172787	0.824497	0.84069	0.141206	0	0	0	0	1	0
FBtr0076763	CG8038	-0.265861	0.933383	0.461814	0.411776	0.709756	0.263144	0.840053	0.110275	0	0	0	0	1	0
FBtr0071319	CG16892	-0.523569	0.578934	0.191748	0.728601	-0.503646	0.376139	0.838991	0.0930605	0	0	0	0	1	0
FBtr0071592	RpL29	0.0693406	0.995616	-0.0498376	0.932931	0.596956	0.286833	0.838704	0.081208	0	0	0	0	1	0
FBtr0078997	CG3792	0.00427824	0.999741	-0.125793	0.818989	0.442275	0.413697	0.83783	0.0818795	0	0	0	0	1	0
FBtr0077456	CG15438	-0.27803	0.850962	0.185776	0.691386	0.312817	0.521941	0.837761	0.0580064	0	0	0	0	1	0
FBtr0081139	robl37BC	0.42146	0.77158	0.482804	0.39856	0.145618	0.840675	0.837474	0.113272	0	0	0	0	1	0
FBtr0071973	CG13544	0.13916	0.995423	0.590846	0.258952	0.0150619	0.985123	0.836786	0.0818795	0	0	0	0	1	0
FBtr0088157	CG13202	-0.0192357	0.996618	0.412735	0.393023	0.304843	0.559472	0.836766	0.071388	0	0	0	0	1	0
FBtr0086899	CG30105	-0.372337	0.812088	0.453324	0.408204	0.755633	0.226973	0.836626	0.104063	0	0	0	0	1	0
FBtr0083928	Pros28.1A	-0.149272	0.976335	-0.126338	0.785867	-0.180859	0.716287	0.835196	0.0493508	0	0	0	0	1	0
FBtr0081301	CG10664	0.47238	0.759742	-0.113358	0.870522	0.610002	0.363808	0.834647	0.145891	0	0	0	0	1	0
FBtr0074472	CG8142	-0.541653	0.441223	0.752682	0.134048	0.149331	0.787541	0.834442	0.0574545	0	1	0	0	1	0
FBtr0074673	Muc18B	0.255398	0.927634	0.58348	0.279952	0.71012	0.233411	0.833249	0.0937843	0	0	0	0	1	0
FBtr0075010	pip	-0.549251	0.417594	-0.328932	0.451774	-1.02703	0.0612025	0.832158	0.054363	0	0	0	-1	1	0
FBtr0085814	CG31204	-0.143131	0.995616	0.0948319	0.887472	-0.446791	0.488553	0.829187	0.136846	0	0	0	0	1	0
FBtr0083326	CG14879	-0.18218	0.990891	-0.624169	0.313779	0.442833	0.49496	0.82908	0.138679	0	0	0	0	1	0
FBtr0075125	CG32195	-0.206184	0.942474	-0.174617	0.714767	0.558224	0.275536	0.828988	0.0631889	0	0	0	0	1	0
FBtr0083503	Prx5037	0.456403	0.758845	0.0682865	0.92304	0.76684	0.257641	0.828649	0.135173	0	0	0	0	1	0
FBtr0079119	CG14011	0.281599	0.862425	0.351515	0.451545	-0.0931752	0.884454	0.828421	0.0693895	0	0	0	0	1	0
FBtr0073501	CG15194	0.255835	0.933693	0.0607592	0.924362	0.494331	0.399602	0.827732	0.105842	0	0	0	0	1	0
FBtr0080387	CG5435	-0.18147	0.950928	0.331631	0.443047	0.0541644	0.928664	0.827538	0.0528806	0	0	0	0	1	0
FBtr0081902	CG8043	-0.0931511	0.995616	1.01241	0.107619	0.313958	0.598256	0.826762	0.106558	0	1	0	0	1	0
FBtr0084280	Dph5	-0.0865144	0.995616	0.120878	0.813232	0.431988	0.391364	0.825093	0.0685569	0	0	0	0	1	0
FBtr0079210	WDR79	-0.269882	0.904493	0.883441	0.124049	0.137325	0.830155	0.822948	0.088207	0	1	0	0	1	0
FBtr0087928	CG30051	-0.264427	0.944078	1.14797	0.0995721	0.890649	0.200524	0.822164	0.136875	0	1	0	0	1	0
FBtr0076103	CG18815	0.292044	0.804662	0.105956	0.818708	0.556026	0.245579	0.821974	0.0497428	0	0	0	0	1	0
FBtr0077385	CG12194	0.820794	0.182483	0.375299	0.419153	0.768044	0.167568	0.820818	0.0690905	0	0	0	0	1	0
FBtr0071020	CG4615	-0.295508	0.848485	-0.212723	0.66318	0.25412	0.632239	0.818164	0.0750675	0	0	0	0	1	0
FBtr0077494	CG31960	0.120013	0.995616	0.553726	0.336191	0.261012	0.685223	0.817512	0.121787	0	0	0	0	1	0
FBtr0077944	CG5565	-0.047384	0.995616	0.250352	0.627251	-0.216176	0.714802	0.817485	0.0922241	0	0	0	0	1	0
FBtr0071691	CG10433	0.116824	0.995616	-0.0801799	0.906135	0.789503	0.243086	0.816405	0.137574	0	0	0	0	1	0
FBtr0074060	CG9240	0.245309	0.940444	0.505963	0.357322	0.829915	0.192762	0.811728	0.10964	0	0	0	0	1	0
FBtr0080039	RluA-1	0.490426	0.707916	-0.614975	0.310563	0.159173	0.831749	0.811363	0.137574	0	0	0	0	1	0
FBtr0077074	Bj1	-0.132112	0.995616	-0.0805125	0.897888	-0.00713407	0.992764	0.809759	0.117203	0	0	0	0	1	0
FBtr0076473	CG3434	0.498548	0.541282	0.459764	0.341329	0.430246	0.402471	0.8097	0.0774592	0	0	0	0	1	0
FBtr0073817	mus101	-0.872529	0.18262	0.402606	0.416408	-0.538397	0.320369	0.808188	0.0880116	0	0	0	0	1	0
FBtr0078793	CG12147	0.202079	0.971388	0.29691	0.587966	-0.246168	0.694636	0.806196	0.114075	0	0	0	0	1	0
FBtr0072359	eyc	0.355597	0.810244	0.153979	0.785237	0.457694	0.413785	0.80409	0.101878	0	0	0	0	1	0
FBtr0073122	CG14955	-0.0239864	0.996486	0.53777	0.209475	0.473706	0.292582	0.803506	0.045988	0	0	0	0	1	0
FBtr0081916	CG8236	0.268123	0.781453	0.489749	0.207308	-0.00623988	0.990934	0.801913	0.0327185	0	0	0	0	1	0
FBtr0088798	CG30371	0.89601	0.188078	0.588985	0.270025	0.35292	0.525103	0.801655	0.100173	0	0	0	0	1	0
FBtr0088580	Hydr1	0.0146582	0.997933	0.149568	0.792189	-0.131356	0.845124	0.800081	0.104382	0	0	0	0	1	0
FBtr0074821	CG6981	0.093721	0.995616	0.531158	0.310573	0.44014	0.421545	0.798955	0.0993881	0	0	0	0	1	0
FBtr0086147	geminin	-0.172861	0.951907	0.340643	0.416408	0.15331	0.762646	0.797456	0.0533353	0	0	0	0	1	0
FBtr0086811	CG5767	-0.261693	0.928183	-0.128531	0.826545	0.717354	0.241124	0.796724	0.112343	0	0	0	0	1	0
FBtr0087188	CG15708	0.279035	0.84695	0.614846	0.198515	-0.0731518	0.90513	0.796275	0.0674555	0	0	0	0	1	0
FBtr0071939	CG4329	0.416295	0.678086	0.782337	0.140074	0.534339	0.310924	0.795969	0.082614	0	1	0	0	1	0
FBtr0075022	mRpL21	0.103952	0.995616	1.08103	0.096506	0.684705	0.270773	0.795541	0.123549	0	1	0	0	1	0
FBtr0080671	CSN1a	0.187252	0.951631	0.164059	0.73106	-0.39401	0.41851	0.794068	0.0703238	0	0	0	0	1	0
FBtr0077622	oho23b	0.0852047	0.995616	0.135523	0.804798	0.651562	0.249969	0.793896	0.0956033	0	0	0	0	1	0
FBtr0070532	CG14269	0.900068	0.181737	0.281031	0.580548	0.316483	0.566699	0.793738	0.0993881	0	0	0	0	1	0
FBtr0085269	CG4980	-0.115662	0.995616	1.24155	0.0237559	0.442221	0.348985	0.793487	0.060408	0	1	0	0	1	0
FBtr0072043	CG30412	0.0908178	0.995616	0.380482	0.394557	-0.178133	0.731011	0.79331	0.0655768	0	0	0	0	1	0
FBtr0086625	Jheh1	0.391067	0.798896	-0.166622	0.784097	-0.00350081	0.997341	0.79188	0.128387	0	0	0	0	1	0
FBtr0073869	CG12479	-0.0102902	0.998025	0.0495843	0.918874	0.0453598	0.938882	0.79146	0.0530035	0	0	0	0	1	0
FBtr0083964	RpS20	-0.0228987	0.996486	-0.0512979	0.927266	0.482904	0.352736	0.789764	0.084003	0	0	0	0	1	0
FBtr0075641	FucTA	0.198643	0.972012	-0.0653828	0.918161	0.208742	0.746804	0.789011	0.119779	0	0	0	0	1	0
FBtr0071780	CG30278	-0.0826429	0.995616	0.165045	0.704073	-0.0837738	0.882824	0.788975	0.0544537	0	0	0	0	1	0
FBtr0071974	CG3215	0.266742	0.865721	0.57786	0.223456	-0.558338	0.270183	0.788342	0.0709285	0	0	0	0	1	0
FBtr0071096	RpS14b	0.244318	0.922725	-0.227949	0.647948	0.596097	0.277001	0.787259	0.0922157	0	0	0	0	1	0
FBtr0073717	CG2209	0.126877	0.995616	0.525582	0.313213	0.632007	0.269661	0.787014	0.101885	0	0	0	0	1	0
FBtr0076094	CG33500	-0.0505508	0.995616	-0.0867691	0.88721	0.869025	0.182194	0.785173	0.124957	0	0	0	0	1	0
FBtr0076906	CG14823	0.623569	0.420336	0.223914	0.663022	0.697916	0.223026	0.7839	0.0997973	0	0	0	0	1	0
FBtr0075431	CG13040	0.0733204	0.995616	0.052758	0.935947	0.441073	0.456406	0.782755	0.127527	0	0	0	0	1	0
FBtr0077809	CG31679	0.108018	0.995616	0.198933	0.710617	-0.276118	0.629405	0.779827	0.106558	0	0	0	0	1	0
FBtr0084185	Cchl	0.176135	0.935472	0.315914	0.405031	0.280844	0.486418	0.778458	0.0407962	0	0	0	0	1	0
FBtr0087482	Adgf-E	-0.0607272	0.995616	0.391474	0.423274	-0.228322	0.681182	0.778342	0.094631	0	0	0	0	1	0
FBtr0081412	cad	-0.407225	0.60151	-0.125079	0.784554	0.249108	0.588992	0.776557	0.0589703	0	0	0	0	1	0
FBtr0078585	CG1076	-0.0607521	0.995616	0.129028	0.807034	0.365184	0.478879	0.776227	0.0909921	0	0	0	0	1	0
FBtr0081589	CG17944	0.192781	0.963552	0.237301	0.639758	-0.079646	0.906965	0.775952	0.100672	0	0	0	0	1	0
FBtr0076389	CG18180	-0.104857	0.995616	-0.521253	0.266387	0.694726	0.191061	0.774182	0.0750675	0	0	0	0	1	0
FBtr0087675	Roe1	0.243302	0.904493	0.00613987	0.991288	0.348879	0.475898	0.773223	0.0780829	0	0	0	0	1	0
FBtr0075805	CG10738	-0.334488	0.846632	2.32949	0.00301771	0.0425313	0.957223	0.772431	0.122856	0	1	0	0	1	0
FBtr0083647	fru	-0.106263	0.995616	-0.196622	0.686072	0.211592	0.695555	0.772352	0.0866652	0	0	0	0	1	0
FBtr0087181	CG30324	-0.65533	0.483238	-0.186533	0.761498	0.654807	0.300464	0.772167	0.144312	0	0	0	0	1	0
FBtr0082240	CG6293	-0.045572	0.995718	-0.713492	0.227596	-0.590044	0.333477	0.770932	0.138042	0	0	0	0	1	0
FBtr0082788	CG14370	0.0195602	0.996486	0.39299	0.331158	-0.0478555	0.93078	0.770419	0.0504106	0	0	0	0	1	0
FBtr0073349	CG17150	-0.177523	0.959699	0.162836	0.729343	0.100975	0.862097	0.769015	0.0743972	0	0	0	0	1	0
FBtr0086809	Muc55B	-0.32912	0.860207	0.392355	0.46871	0.102765	0.890531	0.767389	0.130565	0	0	0	0	1	0
FBtr0087525	CG8331	0.288269	0.797951	0.494665	0.249671	0.354821	0.421211	0.767331	0.0565854	0	0	0	0	1	0
FBtr0075889	CG32118	0.202977	0.97354	-0.0218773	0.975571	0.702726	0.270241	0.766126	0.144745	0	0	0	0	1	0
FBtr0091692	CG33704	-0.00527315	0.999399	0.320205	0.565666	0.217466	0.741528	0.76563	0.137952	0	0	0	0	1	0
FBtr0075023	CG6836	0.196039	0.957605	-0.0718956	0.89641	0.316571	0.550728	0.764837	0.0993177	0	0	0	0	1	0
FBtr0076530	CG13315	0.351177	0.797951	0.184727	0.724259	0.583117	0.292974	0.764466	0.104063	0	0	0	0	1	0
FBtr0071015	CG8300	-0.692828	0.216154	0.623113	0.168699	0.222032	0.632815	0.762493	0.0614771	0	0	0	0	1	0
FBtr0071872	Obp58d	0.0673075	0.995616	0.0615386	0.924825	0.348349	0.563647	0.762144	0.137382	0	0	0	0	1	0
FBtr0087575	RpS23	0.17072	0.978043	-0.299461	0.54831	0.461164	0.391364	0.762041	0.104585	0	0	0	0	1	0
FBtr0073306	CG7465	0.0126636	0.998025	0.213394	0.647215	0.248953	0.624003	0.761722	0.0827555	0	0	0	0	1	0
FBtr0083064	Oscp	0.310035	0.889636	0.075828	0.904495	0.319261	0.596973	0.761595	0.136835	0	0	0	0	1	0
FBtr0075222	CG7580	0.414756	0.671475	-0.271517	0.563673	0.341002	0.499226	0.761448	0.0900022	0	0	0	0	1	0
FBtr0072778	CG12020	0.256827	0.917314	0.339217	0.497108	0.316274	0.564111	0.760986	0.107193	0	0	0	0	1	0
FBtr0087729	Spt-I	-0.0120858	0.998044	0.416568	0.407938	0.0921128	0.892575	0.760741	0.106085	0	0	0	0	1	0
FBtr0074605	CG12609	0.132578	0.995616	0.283576	0.621156	0.475479	0.433517	0.760143	0.147463	0	0	0	0	1	0
FBtr0080398	CG6180	0.351732	0.77158	0.577594	0.241851	0.522297	0.315201	0.758171	0.091948	0	0	0	0	1	0
FBtr0073080	dro6	0.577464	0.436812	0.513981	0.295646	0.586616	0.272188	0.757905	0.0944128	0	0	0	0	1	0
FBtr0079701	Bace	-0.396427	0.580611	-0.53096	0.208545	-1.18172	0.0246816	0.755945	0.0536215	0	0	0	-1	1	0
FBtr0079756	Tsp29Fb	-0.00713334	0.998923	-0.381494	0.335943	0.281329	0.501925	0.754602	0.0503622	0	0	0	0	1	0
FBtr0077560	Sr-CIV	-0.808847	0.275399	0.169626	0.768966	-0.282051	0.637041	0.752419	0.130907	0	0	0	0	1	0
FBtr0081855	CG9603	0.63529	0.406388	0.181535	0.730603	0.605832	0.27748	0.751312	0.109052	0	0	0	0	1	0
FBtr0077144	CG4769	0.46501	0.677863	-0.0904659	0.879223	0.160884	0.811007	0.751131	0.130498	0	0	0	0	1	0
FBtr0077352	Cp110	-0.480083	0.44903	0.695129	0.126816	-0.223081	0.614398	0.750018	0.0567386	0	1	0	0	1	0
FBtr0079319	CG11329	-0.515666	0.425849	1.00779	0.0505028	0.119637	0.820081	0.747641	0.0665382	0	1	0	0	1	0
FBtr0076653	CG6673	0.104144	0.995616	-0.085397	0.865396	0.642943	0.217119	0.747521	0.0848414	0	0	0	0	1	0
FBtr0074912	hale	-0.00183714	0.999741	-0.000674416	0.999361	-0.438456	0.412558	0.746247	0.10934	0	0	0	0	1	0
FBtr0075509	GXIVsPLA2	-0.681036	0.190846	0.143609	0.727743	0.209083	0.63194	0.744583	0.0534858	0	0	0	0	1	0
FBtr0080909	Ugt36Ba	-0.859432	0.182731	-1.10588	0.0609417	-0.723332	0.203896	0.744471	0.104961	0	-1	0	0	1	0
FBtr0078896	CG32945	-0.617167	0.429179	0.0359097	0.952488	-0.278108	0.615747	0.744274	0.113343	0	0	0	0	1	0
FBtr0076033	Rpl10ab	0.16803	0.957605	-0.00921978	0.985202	0.623049	0.201826	0.743262	0.0674555	0	0	0	0	1	0
FBtr0083255	sra	0.00926582	0.998574	0.442026	0.317209	0.664624	0.191777	0.743208	0.0748117	0	0	0	0	1	0
FBtr0071033	cm	-0.0237733	0.996486	1.42272	0.0207163	0.24042	0.656073	0.742634	0.101616	0	1	0	0	1	0
FBtr0077353	Cp110	-0.312983	0.677144	0.894356	0.0461221	-0.121293	0.784273	0.742445	0.0407962	0	1	0	0	1	0
FBtr0087799	CG3884	-0.0759442	0.995616	0.202324	0.685415	0.403563	0.435758	0.742334	0.103898	0	0	0	0	1	0
FBtr0077624	oho23B	-0.0932115	0.995616	0.0569223	0.928002	0.485933	0.398933	0.742017	0.134169	0	0	0	0	1	0
FBtr0085279	CG17856	0.0609702	0.995616	0.0895297	0.876988	-0.0895967	0.898493	0.741757	0.125128	0	0	0	0	1	0
FBtr0088164	zetaTry	0.623395	0.413491	-0.0595596	0.918211	0.444394	0.406293	0.741468	0.110275	0	0	0	0	1	0
FBtr0075052	CG6893	0.215418	0.925364	0.187653	0.677129	-0.0307236	0.962478	0.740759	0.0776855	0	0	0	0	1	0
FBtr0070155	RpL36	0.0773008	0.995616	0.239656	0.588273	0.557223	0.263849	0.739703	0.0810782	0	0	0	0	1	0
FBtr0088396	CG2249	0.529342	0.510839	-0.227524	0.647117	0.529544	0.321313	0.738705	0.106955	0	0	0	0	1	0
FBtr0070906	kdn	0.165795	0.985322	-0.299859	0.557958	0.354394	0.521589	0.738698	0.121762	0	0	0	0	1	0
FBtr0083173	CG9589	0.15332	0.950928	0.287154	0.433202	0.335034	0.398151	0.738216	0.0445213	0	0	0	0	1	0
FBtr0074324	CG32572	0.0163772	0.997634	0.230013	0.625978	0.50879	0.320165	0.737777	0.0962386	0	0	0	0	1	0
FBtr0083755	CG3734	0.497321	0.42489	-0.26634	0.504892	0.342648	0.427205	0.737132	0.0607486	0	0	0	0	1	0
FBtr0080409	CG5781	0.291537	0.859747	0.184684	0.714375	0.0237976	0.972947	0.736849	0.104958	0	0	0	0	1	0
FBtr0071871	Obp58b	0.0364229	0.996486	0.20352	0.688909	0.796352	0.172004	0.736271	0.109744	0	0	0	0	1	0
FBtr0081898	pch2	-0.415284	0.495033	0.260594	0.477514	-0.239668	0.551333	0.735425	0.0460054	0	0	0	0	1	0
FBtr0072834	CG12025	0.280625	0.815949	0.870442	0.0761756	0.667707	0.172814	0.735333	0.0676406	0	1	0	0	1	0
FBtr0079410	Ndae1	-0.293499	0.889314	-0.376583	0.467934	0.0667469	0.926513	0.731394	0.131847	0	0	0	0	1	0
FBtr0081413	cad	-0.262956	0.805629	0.274288	0.46871	-0.010142	0.98606	0.731242	0.051931	0	0	0	0	1	0
FBtr0074272	CG4301	0.193495	0.910254	-0.161353	0.673053	0.470098	0.261867	0.730531	0.0474759	0	0	0	0	1	0
FBtr0082203	Fancl	-0.779462	0.263511	0.302219	0.552187	0.464336	0.398004	0.729623	0.123561	0	0	0	0	1	0
FBtr0076273	CG6409	-0.210014	0.945008	-0.474113	0.328895	-2.48413e-05	0.999921	0.729192	0.104781	0	0	0	0	1	0
FBtr0080006	CG5096	-0.199017	0.931239	-0.562938	0.204382	0.525477	0.263849	0.72897	0.0708908	0	0	0	0	1	0
FBtr0071107	Gclc	0.0388246	0.995616	-0.142388	0.774023	0.256918	0.610142	0.728782	0.0954274	0	0	0	0	1	0
FBtr0084758	bai	0.369764	0.719223	0.139524	0.775791	0.597726	0.245164	0.727489	0.092407	0	0	0	0	1	0
FBtr0073565	cyp28c1	0.439622	0.556332	0.252883	0.555929	0.487587	0.303086	0.727108	0.0781833	0	0	0	0	1	0
FBtr0081181	RpL30	0.0303999	0.996486	0.0340573	0.955845	0.367673	0.506743	0.726562	0.129832	0	0	0	0	1	0
FBtr0074304	CG9981	0.944688	0.166147	0.124218	0.824253	0.370313	0.499284	0.726482	0.126324	0	0	0	0	1	0
FBtr0081423	CG31674	-0.521121	0.580853	-0.625973	0.25219	-0.13038	0.847015	0.726006	0.135069	0	0	0	0	1	0
FBtr0070819	CG12729	0.153825	0.972012	0.320455	0.444067	0.239518	0.603421	0.724942	0.074292	0	0	0	0	1	0
FBtr0079992	CG5037	0.253606	0.856515	0.000966634	0.998798	0.429718	0.344837	0.721911	0.0729332	0	0	0	0	1	0
FBtr0071530	CG9350	0.604594	0.49723	-0.188005	0.744505	0.403457	0.487045	0.721188	0.14978	0	0	0	0	1	0
FBtr0079375	CG17375	0.0737335	0.995616	-0.0395687	0.935127	0.241492	0.589838	0.720951	0.0695229	0	0	0	0	1	0
FBtr0071160	CG15337	-0.14813	0.976335	0.316062	0.45406	0.264817	0.567609	0.719427	0.0785893	0	0	0	0	1	0
FBtr0079074	nompC	-1.01804	0.12486	-0.69443	0.196729	0.77612	0.191046	0.719284	0.124654	-1	0	0	0	1	0
FBtr0088238	CG7712	0.640208	0.416156	-0.151397	0.785314	0.397182	0.467604	0.718031	0.131239	0	0	0	0	1	0
FBtr0083458	Hmx	0.315989	0.840801	0.267189	0.595026	0.728869	0.208666	0.717819	0.12386	0	0	0	0	1	0
FBtr0082775	wntD	-0.212	0.943631	-0.492177	0.313213	0.0584157	0.9294	0.716467	0.108727	0	0	0	0	1	0
FBtr0076586	TrpA1	-0.310881	0.83669	0.395152	0.416408	-0.66769	0.230514	0.715894	0.115243	0	0	0	0	1	0
FBtr0071360	RpS28b	0.00423965	0.999433	-0.300146	0.513746	0.493614	0.326439	0.714187	0.101878	0	0	0	0	1	0
FBtr0076229	Sod	-0.00264444	0.999741	0.0579299	0.920599	0.492507	0.361725	0.713064	0.123695	0	0	0	0	1	0
FBtr0079803	CG3748	-0.0256882	0.996486	-0.0139947	0.978234	0.449273	0.318719	0.712361	0.0725888	0	0	0	0	1	0
FBtr0075960	l(3)S147910	-0.0720389	0.995616	1.41994	0.0206914	0.777811	0.170485	0.712328	0.111372	0	1	0	0	1	0
FBtr0081930	CG9836	0.04964	0.995616	0.0258906	0.966215	0.731576	0.200524	0.711227	0.119779	0	0	0	0	1	0
FBtr0080292	l(2)01810	0.123773	0.985322	-0.0696771	0.871177	0.306675	0.456406	0.710599	0.0580761	0	0	0	0	1	0
FBtr0085672	CG2267	-0.187793	0.944486	-0.19626	0.651739	-0.745345	0.145215	0.709891	0.0818795	0	0	0	-1	1	0
FBtr0071674	HmgZ	-0.125541	0.994418	-0.504496	0.257729	0.238731	0.61049	0.70959	0.0831069	0	0	0	0	1	0
FBtr0087521	CG8323	0.414018	0.505726	0.366202	0.339219	0.265341	0.513637	0.708989	0.0554404	0	0	0	0	1	0
FBtr0079632	CG8292	0.0289683	0.996486	0.549143	0.240921	0.360659	0.452643	0.708504	0.0956073	0	0	0	0	1	0
FBtr0075876	ste14	-0.460521	0.507098	0.428073	0.320009	0.305588	0.499895	0.702692	0.0818795	0	0	0	0	1	0
FBtr0077696	CG15395	0.210399	0.956957	0.41706	0.423274	0.104622	0.882824	0.702177	0.145891	0	0	0	0	1	0
FBtr0076479	RpS17	0.151651	0.995423	-0.280118	0.596336	0.588274	0.310924	0.702109	0.149373	0	0	0	0	1	0
FBtr0077790	CG3557	0.0440789	0.995616	0.196311	0.629337	0.278345	0.521292	0.69989	0.0719999	0	0	0	0	1	0
FBtr0084136	Cby	0.0796927	0.995616	0.090471	0.854568	-0.10025	0.864851	0.698666	0.100265	0	0	0	0	1	0
FBtr0071517	CG9235	0.250929	0.841115	0.233131	0.558275	-0.250431	0.563647	0.697962	0.0705733	0	0	0	0	1	0
FBtr0078426	Atox1	0.00343346	0.999741	0.0794801	0.882054	0.530268	0.316273	0.697324	0.119668	0	0	0	0	1	0
FBtr0074703	CG15882	-0.0391596	0.996486	0.347601	0.486368	0.0293703	0.968855	0.695543	0.135547	0	0	0	0	1	0
FBtr0072048	CG12782	0.197838	0.946111	0.214147	0.640854	0.281368	0.567592	0.694734	0.103462	0	0	0	0	1	0
FBtr0074989	Bet1	0.0286106	0.996486	0.379821	0.426954	0.375601	0.463513	0.694627	0.120542	0	0	0	0	1	0
FBtr0082136	RpS29	-0.0604596	0.995616	-0.242624	0.584696	0.392653	0.410498	0.691017	0.100111	0	0	0	0	1	0
FBtr0074820	CG6981	-0.237498	0.904493	-0.31845	0.472781	-0.0580352	0.925434	0.688484	0.10327	0	0	0	0	1	0
FBtr0070156	RpL36	0.0835993	0.995616	0.256665	0.595623	0.439879	0.398004	0.688426	0.124654	0	0	0	0	1	0
FBtr0083995	Fancd2	-0.528149	0.521116	0.30011	0.5415	0.1489	0.810535	0.687042	0.132385	0	0	0	0	1	0
FBtr0081562	e(y)2b	0.0713767	0.995616	0.464887	0.270144	0.499712	0.272253	0.683713	0.0795496	0	0	0	0	1	0
FBtr0081137	CG31792	0.173213	0.976335	0.360041	0.465902	-0.217131	0.704426	0.681563	0.138738	0	0	0	0	1	0
FBtr0086146	Dpit47	0.716873	0.301206	1.60551	0.0132758	0.420096	0.425084	0.680572	0.134749	0	1	0	0	1	0
FBtr0087751	CG17041	0.34842	0.758391	-0.0756744	0.881883	-0.514722	0.305952	0.679226	0.111536	0	0	0	0	1	0
FBtr0085873	CG2053	-0.256977	0.903931	-0.182351	0.714568	-0.698108	0.207243	0.678625	0.126818	0	0	0	0	1	0
FBtr0075224	CG6333	-0.244783	0.923152	0.953038	0.0983161	-0.372725	0.481128	0.678437	0.137228	0	1	0	0	1	0
FBtr0083459	CG18139	0.0682676	0.995616	0.557455	0.247496	0.575157	0.267609	0.677504	0.115575	0	0	0	0	1	0
FBtr0079254	slam	-0.60947	0.441243	0.16374	0.762826	0.451707	0.40777	0.677102	0.147576	0	0	0	0	1	0
FBtr0070446	CG8636	-0.00266615	0.999741	-0.0257481	0.966215	0.588945	0.277319	0.67476	0.133564	0	0	0	0	1	0
FBtr0075879	Rps12	0.173879	0.950163	-0.0878378	0.845312	0.521816	0.260428	0.671189	0.0865417	0	0	0	0	1	0
FBtr0083133	tefu	-0.215269	0.880653	0.302406	0.418208	-0.130793	0.776203	0.669593	0.065586	0	0	0	0	1	0
FBtr0077395	hoe1	0.208919	0.885615	0.171144	0.647215	0.62917	0.155711	0.668322	0.0622632	0	0	0	0	1	0
FBtr0087714	CG30060	0.132282	0.995423	-0.12785	0.807328	0.225601	0.677488	0.666807	0.132169	0	0	0	0	1	0
FBtr0075416	CG13036	0.00821214	0.99897	0.475725	0.31469	0.595388	0.255614	0.665854	0.122564	0	0	0	0	1	0
FBtr0087335	Vha36	0.0964328	0.995616	0.0283569	0.956206	0.241455	0.609972	0.664251	0.103247	0	0	0	0	1	0
FBtr0091792	CG33791	1.07888	0.078105	-0.106626	0.835743	0.137793	0.814845	0.662077	0.127745	1	0	0	0	1	0
FBtr0072295	CG3494	-0.0565523	0.995616	0.302282	0.442685	-0.0724345	0.892752	0.660628	0.0814028	0	0	0	0	1	0
FBtr0074683	CG8051	0.535658	0.46775	-0.00552572	0.991763	0.398039	0.418514	0.659065	0.122564	0	0	0	0	1	0
FBtr0073820	Rtc1	0.552959	0.365709	0.772387	0.105369	0.670538	0.170104	0.657657	0.0929522	0	1	0	0	1	0
FBtr0070946	Apc7	-0.530209	0.428362	-0.183836	0.680443	0.323785	0.484608	0.655012	0.106561	0	0	0	0	1	0
FBtr0086752	CG14500	0.632839	0.263511	0.701985	0.131226	0.569579	0.228307	0.653786	0.0956073	0	1	0	0	1	0
FBtr0085010	Hex-t1	0.147878	0.97694	0.251393	0.556272	0.34875	0.44654	0.653639	0.10448	0	0	0	0	1	0
FBtr0073218	CG18675	0.0850651	0.995616	0.135381	0.731328	-0.238185	0.559053	0.652088	0.0717804	0	0	0	0	1	0
FBtr0080325	esc	-0.693954	0.207904	-0.0836448	0.854041	-0.203639	0.663133	0.651608	0.0971794	0	0	0	0	1	0
FBtr0083970	RpS30	0.0209437	0.996486	0.129085	0.77079	0.408701	0.359354	0.651487	0.0955188	0	0	0	0	1	0
FBtr0071183	sni	-0.208934	0.917314	0.18643	0.657163	0.298478	0.498013	0.649879	0.0957623	0	0	0	0	1	0
FBtr0077714	CG9894	-0.398589	0.705442	-0.269765	0.572448	0.337862	0.511703	0.648847	0.142794	0	0	0	0	1	0
FBtr0084943	CG31090	0.045263	0.995616	-0.017617	0.971904	-0.109083	0.826599	0.647751	0.0859647	0	0	0	0	1	0
FBtr0088038	CG13189	-0.147694	0.985322	-0.0423766	0.938163	0.376794	0.446506	0.64467	0.132385	0	0	0	0	1	0
FBtr0082179	CG3940	0.220262	0.901415	-0.521036	0.223456	-0.166693	0.724133	0.644346	0.0956073	0	0	0	0	1	0
FBtr0088161	alphaTry	-0.347994	0.658181	-0.535556	0.196852	0.571799	0.205989	0.640785	0.084977	0	0	0	0	1	0
FBtr0071465	Psf3	-0.0810468	0.995616	0.522087	0.164766	0.196433	0.604043	0.640571	0.0579081	0	0	0	0	1	0
FBtr0088242	CG30015	-0.111072	0.995616	-0.42048	0.377319	-0.305246	0.550728	0.634786	0.145077	0	0	0	0	1	0
FBtr0070646	CG12691	0.241632	0.909362	0.633301	0.197886	0.528435	0.300585	0.633645	0.137753	0	0	0	0	1	0
FBtr0087975	CG8321	-0.457522	0.503826	0.377026	0.368566	0.570885	0.228684	0.63313	0.104742	0	0	0	0	1	0
FBtr0078831	Prosbeta2R2	0.392094	0.671475	0.196022	0.667608	0.162186	0.763008	0.630817	0.127236	0	0	0	0	1	0
FBtr0072062	Dcp-1	-0.181837	0.938694	0.165103	0.685415	0.438064	0.313461	0.630081	0.0935624	0	0	0	0	1	0
FBtr0076032	RpL10Ab	0.16665	0.951631	-0.0421254	0.929839	0.442058	0.318229	0.628196	0.100265	0	0	0	0	1	0
FBtr0072267	nvy	-0.0868785	0.995616	0.152668	0.752898	0.701478	0.190679	0.628087	0.135547	0	0	0	0	1	0
FBtr0080225	RfC38	-0.689632	0.182483	0.29826	0.443088	-0.292726	0.484445	0.62788	0.0917877	0	0	0	0	1	0
FBtr0079546	RpL36A	0.212607	0.931093	0.00412026	0.993419	0.39636	0.404046	0.625389	0.126857	0	0	0	0	1	0
FBtr0079104	CG14017	0.114542	0.995616	0.508109	0.287997	-0.871001	0.124207	0.624853	0.145283	0	0	0	-1	1	0
FBtr0071099	CG15330	0.102851	0.995616	0.408713	0.365973	0.400469	0.405387	0.621541	0.132924	0	0	0	0	1	0
FBtr0074444	CG8661	-0.121007	0.995616	-0.0550549	0.915913	0.753539	0.162512	0.621106	0.135614	0	0	0	0	1	0
FBtr0087813	CG3814	-0.0823197	0.995616	0.284005	0.491468	0.41286	0.36051	0.618432	0.111711	0	0	0	0	1	0
FBtr0071131	CG10778	-0.271332	0.790521	0.385637	0.316503	0.135212	0.768317	0.616895	0.0868664	0	0	0	0	1	0
FBtr0081710	CG10298	-0.34899	0.680138	0.271649	0.497287	-0.214819	0.632264	0.616834	0.104511	0	0	0	0	1	0
FBtr0076069	CG5718	0.120605	0.991228	0.143514	0.737388	-0.488875	0.277319	0.616149	0.104392	0	0	0	0	1	0
FBtr0084410	RpS3	0.0755282	0.995616	0.0158422	0.97569	0.184956	0.699215	0.615935	0.113378	0	0	0	0	1	0
FBtr0076233	CG11801	-0.228477	0.904493	0.0911661	0.846433	0.306713	0.504414	0.612727	0.124322	0	0	0	0	1	0
FBtr0084371	Ir	0.593636	0.282861	-0.0711249	0.872544	0.139479	0.774786	0.610918	0.103293	0	0	0	0	1	0
FBtr0073171	CG10863	0.338722	0.647492	0.0234521	0.958316	0.333145	0.408712	0.609663	0.088207	0	0	0	0	1	0
FBtr0070713	Proc-R	-0.217272	0.925364	-0.421511	0.345333	0.41115	0.388736	0.608834	0.135547	0	0	0	0	1	0
FBtr0076203	SuUR	0.03517	0.995616	0.682467	0.145206	0.0231839	0.970877	0.60548	0.126818	0	1	0	0	1	0
FBtr0085779	CG31004	0.10183	0.995616	0.200433	0.65974	0.223267	0.655407	0.605145	0.141206	0	0	0	0	1	0
FBtr0075877	Rps12	0.145233	0.976335	-0.151443	0.730591	0.527891	0.262145	0.604879	0.119778	0	0	0	0	1	0
FBtr0071676	Tim10	0.150459	0.965322	0.0886483	0.839199	0.351472	0.40886	0.602651	0.104958	0	0	0	0	1	0
FBtr0081127	CG10373	-0.0105115	0.997933	-0.00631155	0.988471	0.21779	0.577148	0.601795	0.0803782	0	0	0	0	1	0
FBtr0085862	CG2196	0.219225	0.914379	-0.425831	0.325019	0.628615	0.20321	0.600728	0.127659	0	0	0	0	1	0
FBtr0079179	ifc	-0.146725	0.967446	0.0523854	0.907049	0.21615	0.615283	0.598529	0.104063	0	0	0	0	1	0
FBtr0080035	Myo31DF	0.0422393	0.995616	-0.0098425	0.982878	0.198915	0.649347	0.598436	0.103119	0	0	0	0	1	0
FBtr0086218	CG13424	0.0332744	0.995808	0.34253	0.410397	0.515802	0.269661	0.595279	0.123961	0	0	0	0	1	0
FBtr0074698	inx5	-0.212514	0.918926	0.0896092	0.846044	0.154531	0.760609	0.593896	0.128305	0	0	0	0	1	0
FBtr0087669	mip120	-0.353936	0.725351	0.44082	0.325314	-0.39488	0.404604	0.593643	0.144171	0	0	0	0	1	0
FBtr0080046	pie	-0.756499	0.196307	0.187998	0.680008	-0.359741	0.44654	0.59265	0.146193	0	0	0	0	1	0
FBtr0087926	CG8520	0.0855574	0.995616	-0.25962	0.464456	0.0445912	0.928664	0.589821	0.0848414	0	0	0	0	1	0
FBtr0077268	CG1532	0.0885941	0.995616	0.500578	0.240886	0.160368	0.737708	0.586987	0.122536	0	0	0	0	1	0
FBtr0084932	RpL27	-0.243386	0.893428	-0.136017	0.772826	0.297758	0.529169	0.581971	0.14978	0	0	0	0	1	0
FBtr0080180	ial	-0.592406	0.324379	0.90717	0.071296	0.308971	0.491164	0.579236	0.135547	0	1	0	0	1	0
FBtr0071240	CG12116	1.3661	0.0217611	0.475089	0.286151	0.421781	0.367482	0.576416	0.148666	1	0	0	0	1	0
FBtr0072762	CG7970	0.239513	0.893871	0.278947	0.515024	0.488697	0.303098	0.574443	0.149028	0	0	0	0	1	0
FBtr0085062	His2Av	-0.149993	0.960189	0.243689	0.521806	0.206295	0.626176	0.572892	0.10934	0	0	0	0	1	0
FBtr0080524	RpL24	0.0522516	0.995616	-0.233592	0.563673	0.181255	0.695931	0.570856	0.128872	0	0	0	0	1	0
FBtr0081156	l(2)37Cd	-0.449469	0.438206	0.379096	0.317982	0.251487	0.531762	0.570177	0.103898	0	0	0	0	1	0
FBtr0084301	CG17625	0.300098	0.786733	-0.0992682	0.826437	0.163297	0.737708	0.569127	0.138042	0	0	0	0	1	0
FBtr0081867	RpA-70	-0.374323	0.628822	0.224755	0.576003	-0.201929	0.655176	0.564364	0.130565	0	0	0	0	1	0
FBtr0073850	Ndc80	-1.08882	0.0472854	0.517799	0.232736	-0.360635	0.41851	0.561268	0.142621	-1	0	0	0	1	0
FBtr0087523	CG18324	0.336519	0.70424	-0.272409	0.496242	0.283004	0.514467	0.560123	0.134169	0	0	0	0	1	0
FBtr0080127	CG17108	0.823793	0.0970203	-0.107029	0.795668	0.0092389	0.986728	0.556835	0.115867	1	0	0	0	1	0
FBtr0087154	CG6262	0.119975	0.99165	0.20663	0.610542	-0.0861943	0.873067	0.556228	0.135173	0	0	0	0	1	0
FBtr0073607	CG1578	0.0653212	0.995616	0.446288	0.277063	0.382581	0.37402	0.554937	0.13195	0	0	0	0	1	0
FBtr0077697	Prosbeta4R1	0.539131	0.341002	0.371343	0.345333	0.0717102	0.892012	0.554089	0.124778	0	0	0	0	1	0
FBtr0072253	Zfrp8	0.00752559	0.998597	0.0957868	0.82487	0.445246	0.307988	0.553598	0.132385	0	0	0	0	1	0
FBtr0077808	CG32463	0.0447385	0.995616	0.334904	0.366576	0.10878	0.812782	0.549956	0.108976	0	0	0	0	1	0
FBtr0070816	Prosbeta2R1	0.327229	0.710211	0.235124	0.55199	0.6046	0.193673	0.542056	0.138052	0	0	0	0	1	0
FBtr0081844	stck	-0.142607	0.950928	0.0961683	0.796494	-0.00592201	0.990934	0.541746	0.0956033	0	0	0	0	1	0
FBtr0071515	Ipk1	0.607296	0.261091	0.894698	0.0609417	0.415989	0.33203	0.541437	0.138042	0	1	0	0	1	0
FBtr0072299	Crtp	0.616276	0.180885	0.482294	0.192302	0.270076	0.465794	0.54084	0.100095	0	0	0	0	1	0
FBtr0088057	CG30038	-0.470886	0.414154	0.265891	0.474794	0.246517	0.54492	0.539867	0.122536	0	0	0	0	1	0
FBtr0082683	d-cup	0.114325	0.995423	0.293348	0.461871	-0.0176628	0.976693	0.539551	0.145996	0	0	0	0	1	0
FBtr0077452	RpL27A	-0.00262357	0.999741	0.160696	0.686086	0.27932	0.499684	0.533342	0.135314	0	0	0	0	1	0
FBtr0089422	RpS7	0.0614956	0.995616	-0.0168516	0.972054	0.36342	0.376528	0.530426	0.131847	0	0	0	0	1	0
FBtr0082269	CG4073	-0.0443845	0.995616	0.145077	0.720599	-0.372571	0.374858	0.524601	0.143052	0	0	0	0	1	0
FBtr0086552	SdhA	0.359869	0.612511	-0.277925	0.459906	0.403238	0.326891	0.523565	0.135614	0	0	0	0	1	0
FBtr0083400	cal1	-0.0855684	0.995616	0.557991	0.181361	0.306812	0.458926	0.520635	0.146417	0	0	0	0	1	0
FBtr0075228	frc	-0.178629	0.939436	-0.0500883	0.912161	0.184358	0.678424	0.520249	0.14978	0	0	0	0	1	0
FBtr0076423	RpS9	0.00270942	0.999741	0.191752	0.621171	0.186734	0.668745	0.514218	0.147465	0	0	0	0	1	0
FBtr0088900	CG1553	-0.0950069	0.995616	0.137848	0.713009	0.116698	0.79336	0.505677	0.129944	0	0	0	0	1	0
FBtr0087952	CG8831	0.00849375	0.998044	0.248912	0.480384	-0.026376	0.960228	0.485443	0.139636	0	0	0	0	1	0
FBtr0073882	NA	-1.33431	0.840995	0.617722	0.787877	2.15265	0.351251	2.56973	0.183585	0	0	0	0	0	0
FBtr0081028	CG31740	0.181576	0.995616	0.708825	0.725983	-1.24434	0.551555	2.38957	0.175308	0	0	0	0	0	0
FBtr0089227	sphinx	-0.848921	0.995423	-3.34438	0.277063	2.13414	0.50416	2.15084	0.424233	0	0	0	0	0	0
FBtr0078549	CG33169	-0.0761336	0.996486	-0.263881	0.885712	1.35373	0.445273	2.13423	0.160924	0	0	0	0	0	0
FBtr0079406	NA	-0.37702	0.995616	-0.600018	0.748028	-0.294554	0.900671	2.05241	0.196237	0	0	0	0	0	0
FBtr0072869	Cpr62Bc	0.779167	0.931225	-1.17312	0.464655	-0.229862	0.918297	2.01248	0.17407	0	0	0	0	0	0
FBtr0088731	NA	1.16796	0.897162	-1.50575	0.475229	0.0726959	0.982772	1.95178	0.306654	0	0	0	0	0	0
FBtr0078118	CG11455	3.3483	0.106171	0.183363	0.921196	3.33908	0.0877945	1.89631	0.188889	1	0	0	1	0	0
FBtr0079376	CG17377	-0.0473018	0.997933	-0.00474355	0.998315	-1.21924	0.475219	1.89053	0.192668	0	0	0	0	0	0
FBtr0071893	CG9825	-1.19041	0.717385	-0.607646	0.685153	1.03425	0.506743	1.84652	0.167219	0	0	0	0	0	0
FBtr0088441	CG15863	0.24115	0.995616	-0.390534	0.821659	2.06127	0.248524	1.82699	0.202566	0	0	0	0	0	0
FBtr0086325	CG16898	-0.638502	0.936911	0.202247	0.896782	0.160289	0.933695	1.79104	0.15815	0	0	0	0	0	0
FBtr0087092	loopin-1	-0.0114881	0.999741	0.189443	0.933884	-1.38091	0.504854	1.78953	0.301903	0	0	0	0	0	0
FBtr0088357	CG12902	0.00130615	0.999833	0.983886	0.493723	-1.0551	0.497415	1.73936	0.187698	0	0	0	0	0	0
FBtr0081490	CG31988	0.0204772	0.99897	0.0810287	0.970029	-1.91438	0.311982	1.72938	0.264899	0	0	0	0	0	0
FBtr0073671	CG32652	-0.140212	0.996486	0.341913	0.872229	-1.26088	0.540701	1.71144	0.316966	0	0	0	0	0	0
FBtr0085277	Mst98Ca	0.244636	0.995616	0.38568	0.795256	-0.908084	0.538385	1.70643	0.172606	0	0	0	0	0	0
FBtr0082917	CG9920	0.0513871	0.996948	-0.400633	0.783836	-0.894757	0.538385	1.70448	0.168423	0	0	0	0	0	0
FBtr0076719	CG13674	0.752845	0.891808	0.147777	0.925861	1.58015	0.292391	1.69145	0.171134	0	0	0	0	0	0
FBtr0081690	Ccp84Ad	0.739206	0.931225	-0.918245	0.552169	1.05949	0.525577	1.69085	0.226416	0	0	0	0	0	0
FBtr0084475	CG10252	-0.486707	0.965269	0.423564	0.756534	-0.986704	0.467852	1.69026	0.151027	0	0	0	0	0	0
FBtr0081256	CG13078	0.894236	0.828651	-0.6518	0.640951	0.0651424	0.974549	1.68686	0.180178	0	0	0	0	0	0
FBtr0077931	CG31926	0.566382	0.952065	-0.529355	0.712143	1.67198	0.277319	1.61058	0.197803	0	0	0	0	0	0
FBtr0089742	dj	-0.124273	0.995616	-0.0407247	0.979196	-1.33387	0.351365	1.60075	0.18179	0	0	0	0	0	0
FBtr0082625	CG4830	3.23741	0.136232	1.97375	0.251803	-0.418308	0.843606	1.58841	0.284463	1	0	0	0	0	0
FBtr0081871	CG31259	0.4991	0.972012	0.313117	0.834671	-0.185302	0.921106	1.56577	0.203855	0	0	0	0	0	0
FBtr0081604	CG1288	0.262037	0.995616	0.171776	0.91152	-1.42606	0.324498	1.55973	0.196281	0	0	0	0	0	0
FBtr0080888	Cyt-c-d	0.819285	0.922973	0.966021	0.557958	-1.12773	0.527464	1.54052	0.298853	0	0	0	0	0	0
FBtr0086518	CG9975	0.0264045	0.998811	-0.0549494	0.975442	-0.607576	0.71065	1.52414	0.235473	0	0	0	0	0	0
FBtr0077114	S6k	-0.247081	0.995616	-0.826774	0.551814	0.963927	0.520093	1.52291	0.225268	0	0	0	0	0	0
FBtr0071929	CG3746	1.22343	0.628822	1.74149	0.209959	1.41117	0.32402	1.51072	0.204099	0	0	0	0	0	0
FBtr0072046	CG3124	0.126407	0.996486	0.44252	0.879776	-2.75699	0.333248	1.50997	0.532149	0	0	0	0	0	0
FBtr0086244	exu	-0.0603821	0.997748	0.491023	0.800998	-0.844794	0.675999	1.49712	0.350775	0	0	0	0	0	0
FBtr0083875	CG31206	0.193437	0.995616	0.151635	0.907414	-0.590274	0.641349	1.48702	0.155379	0	0	0	0	0	0
FBtr0075471	CG4962	2.7726	0.260067	0.652344	0.730603	0.224156	0.928664	1.46189	0.365246	0	0	0	0	0	0
FBtr0087649	CG13340	0.104935	0.996486	0.582453	0.772624	-1.7213	0.393039	1.46144	0.385663	0	0	0	0	0	0
FBtr0089674	sut4	0.130465	0.995616	0.152175	0.909663	-0.558915	0.672575	1.46038	0.170984	0	0	0	0	0	0
FBtr0086475	CG15126	0.497121	0.978003	1.45342	0.325019	1.25082	0.420871	1.45374	0.265285	0	0	0	0	0	0
FBtr0084611	CG33340	0.346431	0.995616	0.419986	0.78556	-1.3821	0.370245	1.45355	0.258364	0	0	0	0	0	0
FBtr0081631	djl	-0.0894923	0.996486	0.0448661	0.976877	-0.71303	0.604463	1.44889	0.203574	0	0	0	0	0	0
FBtr0086995	NA	-0.463174	0.995616	0.121571	0.966215	-2.02114	0.413066	1.44826	0.487728	0	0	0	0	0	0
FBtr0082940	soti	0.154017	0.995616	0.320313	0.838818	-1.3818	0.370464	1.44631	0.260299	0	0	0	0	0	0
FBtr0071343	CG9034	0.626212	0.948212	1.46842	0.321835	1.26218	0.41851	1.44334	0.268969	0	0	0	0	0	0
FBtr0073764	Jafrac1	-0.00485329	0.999741	-1.20405	0.495995	0.348098	0.885807	1.43087	0.371543	0	0	0	0	0	0
FBtr0087861	ox	0.488997	0.985119	0.937432	0.532977	0.926701	0.571334	1.42913	0.290655	0	0	0	0	0	0
FBtr0071325	NA	0.0832212	0.996486	-0.211312	0.889266	1.03692	0.478744	1.41794	0.250346	0	0	0	0	0	0
FBtr0080970	CG6380	0.0825708	0.996486	0.473522	0.7442	-0.763285	0.60916	1.40961	0.252161	0	0	0	0	0	0
FBtr0077293	CG1324	0.047077	0.997748	0.24527	0.873829	-0.725051	0.639619	1.40527	0.261902	0	0	0	0	0	0
FBtr0080955	CG6304	0.115189	0.996486	0.359667	0.86002	-1.48167	0.455365	1.3995	0.40073	0	0	0	0	0	0
FBtr0086047	NA	0.24482	0.995616	0.759645	0.5415	-1.11637	0.406194	1.39477	0.215777	0	0	0	0	0	0
FBtr0080334	CG16996	-0.294831	0.995423	0.509881	0.63056	1.14582	0.318966	1.39075	0.150588	0	0	0	0	0	0
FBtr0080662	CG4218	0.184705	0.995616	0.264466	0.861646	-0.887011	0.550813	1.38958	0.260495	0	0	0	0	0	0
FBtr0076933	CG32388	0.0246655	0.998044	0.277268	0.813986	-0.808485	0.483905	1.38428	0.163088	0	0	0	0	0	0
FBtr0083797	CG11659	-0.140734	0.995616	-1.08288	0.377362	0.0290435	0.986856	1.378	0.208868	0	0	0	0	0	0
FBtr0072339	CG4692	0.151093	0.995616	-0.4003	0.72739	1.57132	0.211918	1.36126	0.173978	0	0	0	0	0	0
FBtr0071081	CG12689	-0.0924273	0.996486	0.0603472	0.969832	-0.17687	0.919782	1.34793	0.24026	0	0	0	0	0	0
FBtr0080142	CG17086	0.957779	0.858415	-0.0988271	0.958393	0.633341	0.732714	1.34018	0.348522	0	0	0	0	0	0
FBtr0084056	CG17298	1.53639	0.797951	-0.74094	0.751507	0.814587	0.75688	1.33802	0.503893	0	0	0	0	0	0
FBtr0082631	CG5538	-0.283205	0.995616	0.134636	0.943757	-1.48205	0.393492	1.33676	0.356887	0	0	0	0	0	0
FBtr0073439	CG15201	0.390332	0.975865	-0.579463	0.605077	1.1671	0.333057	1.33301	0.187698	0	0	0	0	0	0
FBtr0077617	CG12400	0.737919	0.78233	0.507741	0.617985	1.1637	0.297825	1.3315	0.152709	0	0	0	0	0	0
FBtr0085278	Mst98Cb	0.0830576	0.996486	0.487043	0.742642	-0.79675	0.600724	1.32986	0.287898	0	0	0	0	0	0
FBtr0076638	CG6372	-0.0253155	0.999283	0.974029	0.67528	-2.13897	0.380247	1.3249	0.522973	0	0	0	0	0	0
FBtr0086957	mthl4	0.283923	0.995423	-0.168595	0.880365	1.24636	0.269661	1.32436	0.152758	0	0	0	0	0	0
FBtr0074665	CG14191	-0.601522	0.898261	0.0163909	0.989971	-0.239295	0.870499	1.3211	0.187899	0	0	0	0	0	0
FBtr0074610	Cyp18a1	0.651451	0.828094	0.393479	0.705643	1.22632	0.273804	1.31653	0.154153	0	0	0	0	0	0
FBtr0074485	CG8316	-0.176569	0.995616	2.21526	0.0723961	-0.208422	0.881543	1.31286	0.167072	0	1	0	0	0	0
FBtr0084170	CG6332	0.196481	0.995616	0.4572	0.659475	-0.0688702	0.96414	1.31132	0.160566	0	0	0	0	0	0
FBtr0077915	RFeSP	0.849948	0.739679	0.583694	0.588273	0.854689	0.458	1.30969	0.182568	0	0	0	0	0	0
FBtr0080821	CG31819	0.132511	0.995616	0.476589	0.641248	-0.479362	0.675951	1.30215	0.161296	0	0	0	0	0	0
FBtr0079856	CG31709	-0.19946	0.995616	0.119223	0.939445	-0.848915	0.559053	1.30132	0.277447	0	0	0	0	0	0
FBtr0085246	CG5017	0.0233261	0.99897	0.448967	0.767956	-1.20273	0.427984	1.2968	0.307478	0	0	0	0	0	0
FBtr0071840	CG10344	-0.62294	0.979382	-1.67827	0.36588	1.40939	0.471874	1.2943	0.435408	0	0	0	0	0	0
FBtr0073059	dro2	0.363142	0.972012	2.03842	0.0826069	0.964659	0.369771	1.29042	0.158111	0	1	0	0	0	0
FBtr0074562	NA	1.13325	0.771392	1.19907	0.427964	1.51506	0.358419	1.28971	0.346661	0	0	0	0	0	0
FBtr0077468	CG2955	-0.0926151	0.996486	-0.266401	0.866528	-1.16877	0.444748	1.27763	0.318339	0	0	0	0	0	0
FBtr0076913	CG15829	0.709132	0.785833	1.64301	0.134048	1.18575	0.277319	1.2707	0.158111	0	1	0	0	0	0
FBtr0087107	CG5089	0.333566	0.995616	0.674957	0.689748	-1.5147	0.390897	1.26282	0.391758	0	0	0	0	0	0
FBtr0089699	Tim17b2	0.177787	0.995616	0.486867	0.649982	-0.263458	0.846091	1.26056	0.188767	0	0	0	0	0	0
FBtr0080796	NA	-0.506162	0.91032	-0.33005	0.751455	-0.629347	0.551144	1.25889	0.159894	0	0	0	0	0	0
FBtr0086729	IM23	-3.20317	0.0333039	-0.64665	0.562877	-0.238176	0.873901	1.25439	0.214818	-1	0	0	0	0	0
FBtr0083902	MtnD	-0.522301	0.931225	0.144825	0.907902	0.344516	0.799566	1.25039	0.205293	0	0	0	0	0	0
FBtr0079110	NA	-0.14357	0.995616	0.321847	0.843301	-1.81617	0.270773	1.24745	0.347122	0	0	0	0	0	0
FBtr0071854	CG4269	-0.400991	0.972012	-0.123855	0.923237	1.01285	0.390964	1.24385	0.20835	0	0	0	0	0	0
FBtr0080472	CG9306	0.91486	0.818314	1.76437	0.221988	0.68241	0.658642	1.23465	0.315778	0	0	0	0	0	0
FBtr0080802	CG13245	-0.518702	0.976335	-0.0265359	0.988403	-1.48007	0.361734	1.23324	0.358503	0	0	0	0	0	0
FBtr0100020	CG33977	-0.54569	0.976335	-0.898754	0.565444	1.44666	0.391364	1.2279	0.383069	0	0	0	0	0	0
FBtr0071252	NA	-0.26343	0.995616	-2.30376	0.340059	0.856075	0.767397	1.21039	0.590403	0	0	0	0	0	0
FBtr0086645	CG15088	0.297213	0.995616	2.20511	0.134158	-0.0162181	0.992867	1.20943	0.307907	0	1	0	0	0	0
FBtr0085170	CG3330	-0.373111	0.985742	0.31273	0.808385	-0.571591	0.669749	1.20808	0.256056	0	0	0	0	0	0
FBtr0073467	CG1394	0.31611	0.995616	0.699803	0.662076	-0.939742	0.582805	1.20443	0.393283	0	0	0	0	0	0
FBtr0076443	NA	-0.0148861	0.99897	-0.851451	0.381972	0.918354	0.380157	1.20034	0.175004	0	0	0	0	0	0
FBtr0086728	CG15067	0.0815032	0.995616	0.318291	0.761426	0.28352	0.816991	1.19813	0.179376	0	0	0	0	0	0
FBtr0072913	CG15820	1.5335	0.258949	1.70937	0.127352	1.41273	0.215259	1.19745	0.185638	0	1	0	0	0	0
FBtr0076198	CG32081	-0.229275	0.995616	0.149548	0.899954	-0.900834	0.423454	1.19539	0.207778	0	0	0	0	0	0
FBtr0081055	CG31787	-0.128639	0.995616	0.291799	0.772797	-0.381855	0.726661	1.19256	0.167312	0	0	0	0	0	0
FBtr0083642	fru	0.13085	0.995616	0.527787	0.603916	0.47536	0.678722	1.18947	0.195079	0	0	0	0	0	0
FBtr0072629	LysC	3.18862	0.0709488	1.64454	0.240029	2.17646	0.170485	1.1891	0.322761	1	0	0	0	0	0
FBtr0081705	CG1137	-0.220025	0.995616	-0.163581	0.882054	-0.301984	0.808694	1.18898	0.186781	0	0	0	0	0	0
FBtr0083892	CG4323	0.230245	0.995616	0.269341	0.799914	-0.679017	0.514967	1.1859	0.180495	0	0	0	0	0	0
FBtr0083769	CG6255	-0.305952	0.986948	0.0914804	0.93707	-0.692934	0.507968	1.18492	0.18302	0	0	0	0	0	0
FBtr0082795	CG10841	-0.429079	0.965269	-0.412748	0.726585	-0.525806	0.68022	1.1792	0.245349	0	0	0	0	0	0
FBtr0083826	CG4836	0.290833	0.995616	0.904892	0.594658	-1.92523	0.302129	1.17714	0.4429	0	0	0	0	0	0
FBtr0086575	NA	-0.0549498	0.997748	0.160868	0.932872	-1.74694	0.321533	1.17603	0.419706	0	0	0	0	0	0
FBtr0081702	NA	0.155157	0.995616	0.265023	0.816337	-0.468212	0.695931	1.17333	0.214252	0	0	0	0	0	0
FBtr0081491	CG31624	0.0333646	0.998597	0.413947	0.813841	-1.62115	0.353511	1.17248	0.41865	0	0	0	0	0	0
FBtr0076991	Lcp65Ac	0.0388336	0.996486	0.670488	0.447654	-0.499081	0.608501	1.16966	0.153754	0	0	0	0	0	0
FBtr0071926	CG30217	0.232331	0.995616	0.477649	0.60042	0.990131	0.319316	1.16903	0.161316	0	0	0	0	0	0
FBtr0071471	CG15306	0.0766964	0.996486	0.111611	0.951346	-0.684798	0.697718	1.16772	0.398797	0	0	0	0	0	0
FBtr0072634	LysD	2.34024	0.0842152	1.3132	0.225672	1.55765	0.197791	1.16715	0.209994	1	0	0	0	0	0
FBtr0083641	fru	0.674672	0.917314	1.21006	0.366734	-0.359168	0.830537	1.16026	0.330504	0	0	0	0	0	0
FBtr0080674	CG33309	-0.0100371	0.999325	0.307212	0.771363	-0.645372	0.54492	1.15577	0.195624	0	0	0	0	0	0
FBtr0071437	NA	-0.227912	0.995616	-0.882641	0.376136	-0.105226	0.940289	1.1533	0.197803	0	0	0	0	0	0
FBtr0076626	ergic53	0.00927818	0.999741	-0.421483	0.724259	0.93154	0.445614	1.14501	0.265048	0	0	0	0	0	0
FBtr0082976	CG7886	0.0458308	0.996486	0.579255	0.579913	-0.630415	0.580159	1.14265	0.226452	0	0	0	0	0	0
FBtr0085198	CG31058	0.235967	0.995616	1.56592	0.135589	0.155644	0.903605	1.1419	0.183585	0	1	0	0	0	0
FBtr0076869	CG8564	0.701575	0.926159	0.687906	0.634452	-1.27502	0.407673	1.13722	0.3757	0	0	0	0	0	0
FBtr0073569	CG15739	-0.789995	0.717977	-0.647342	0.499055	0.258108	0.833953	1.13571	0.195744	0	0	0	0	0	0
FBtr0078657	CG11373	0.296351	0.995423	1.09491	0.314315	-0.193182	0.893645	1.13374	0.238699	0	0	0	0	0	0
FBtr0076288	CG32064	-0.792221	0.973211	-0.374378	0.877893	-2.21377	0.354389	1.13327	0.583516	0	0	0	0	0	0
FBtr0087921	Cpr49Af	0.299005	0.995423	0.593217	0.584383	-0.00182532	0.999407	1.12947	0.247837	0	0	0	0	0	0
FBtr0079063	TpnC25D	-0.111528	0.995616	-0.201384	0.877848	-0.857642	0.498387	1.12827	0.287713	0	0	0	0	0	0
FBtr0087480	CG12860	0.0408848	0.99686	0.465628	0.667565	-1.05474	0.358419	1.12334	0.238874	0	0	0	0	0	0
FBtr0081700	CG15177	0.0994106	0.995616	0.520496	0.577029	-0.558822	0.583344	1.12268	0.186498	0	0	0	0	0	0
FBtr0089003	CG30503	1.0927	0.393411	1.26562	0.167359	0.901621	0.326891	1.12151	0.151127	0	0	0	0	0	0
FBtr0082608	GstD9	0.941117	0.522287	0.638908	0.464039	1.80739	0.0941771	1.12095	0.166201	0	0	0	1	0	0
FBtr0088800	CG30376	0.138749	0.995616	0.192506	0.900003	-1.29824	0.375357	1.12029	0.35712	0	0	0	0	0	0
FBtr0071841	CG10344	-0.453001	0.995616	-1.61696	0.379085	1.085	0.585807	1.12015	0.500366	0	0	0	0	0	0
FBtr0071054	CG1999	0.413615	0.98765	0.460969	0.74507	-0.6174	0.682687	1.11902	0.351767	0	0	0	0	0	0
FBtr0084382	CG4434	0.222723	0.995616	0.531621	0.641248	-0.514295	0.688589	1.11735	0.269266	0	0	0	0	0	0
FBtr0080682	Mst35Ba	0.11851	0.995616	0.273469	0.828421	-0.906943	0.462505	1.11534	0.283055	0	0	0	0	0	0
FBtr0080954	CG15136	0.176066	0.995616	0.257867	0.890911	-0.973272	0.596039	1.11092	0.468369	0	0	0	0	0	0
FBtr0080670	CG4691	0.132689	0.995616	0.360354	0.80768	-1.29102	0.377315	1.10911	0.360007	0	0	0	0	0	0
FBtr0087087	CG4439	-0.0499577	0.997748	0.173482	0.919106	-1.52649	0.336055	1.10776	0.400588	0	0	0	0	0	0
FBtr0087189	krimp	-0.737622	0.77158	-0.802049	0.417888	1.96797	0.103514	1.10661	0.217074	0	0	0	1	0	0
FBtr0076040	Rpt4R	0.576809	0.905659	0.785825	0.466442	0.138839	0.926539	1.10615	0.260187	0	0	0	0	0	0
FBtr0075684	CG5048	0.074308	0.996486	-0.925277	0.336191	0.0978961	0.942331	1.10302	0.199969	0	0	0	0	0	0
FBtr0080640	l(2)34Fc	0.755019	0.896505	-0.543539	0.701293	0.580772	0.714802	1.10178	0.3709	0	0	0	0	0	0
FBtr0070755	TrxT	0.896642	0.904493	0.569634	0.751507	-1.05881	0.5636	1.10062	0.471667	0	0	0	0	0	0
FBtr0074361	CG9672	-0.602717	0.815949	-0.346546	0.709785	0.126123	0.918617	1.10025	0.177833	0	0	0	0	0	0
FBtr0076639	CG32351	0.162302	0.995616	0.940422	0.488417	-1.50116	0.318229	1.09106	0.375631	0	0	0	0	0	0
FBtr0075131	NA	-0.206532	0.995616	0.249412	0.88043	-1.18005	0.458	1.0891	0.416917	0	0	0	0	0	0
FBtr0072676	mtacp1	1.03625	0.552876	1.21931	0.246271	0.596394	0.588681	1.08493	0.233742	0	0	0	0	0	0
FBtr0071788	NA	0.574519	0.95082	-0.190403	0.902535	1.57219	0.299277	1.08492	0.377937	0	0	0	0	0	0
FBtr0088184	TpnC47D	0.788857	0.717202	-0.466895	0.631027	0.738271	0.47243	1.08465	0.210975	0	0	0	0	0	0
FBtr0076683	fan	0.548715	0.863435	0.871474	0.349498	-0.338693	0.759625	1.08449	0.194747	0	0	0	0	0	0
FBtr0081455	CG33322	0.064588	0.996486	0.797254	0.477998	-1.21071	0.326626	1.08108	0.288913	0	0	0	0	0	0
FBtr0075689	CG13473	-0.209211	0.995616	0.0608738	0.952381	-1.01964	0.283554	1.08063	0.167865	0	0	0	0	0	0
FBtr0078004	CG13946	0.754521	0.660322	-0.202508	0.82605	1.73212	0.0944414	1.07909	0.165881	0	0	0	1	0	0
FBtr0077425	CG16857	-0.0647259	0.996486	-0.474323	0.568402	-0.163899	0.885395	1.07875	0.159894	0	0	0	0	0	0
FBtr0075490	CG5157	1.71723	0.18262	1.7738	0.112777	0.760834	0.465089	1.06987	0.225171	0	1	0	0	0	0
FBtr0082361	CG17734	0.324889	0.995616	-2.20071	0.11872	1.04529	0.431137	1.06565	0.339237	0	-1	0	0	0	0
FBtr0072103	CG4019	0.794594	0.749811	-1.36993	0.208024	0.00106973	0.999645	1.065	0.250668	0	0	0	0	0	0
FBtr0074299	CG9906	-0.836514	0.985322	-2.81286	0.290595	1.01288	0.738204	1.06496	0.673897	0	0	0	0	0	0
FBtr0071663	CG10320	0.642578	0.739999	0.423009	0.607129	0.66763	0.44529	1.06231	0.157312	0	0	0	0	0	0
FBtr0100169	NA	1.4665	0.491374	-0.227017	0.875207	1.94778	0.199275	1.06048	0.363042	0	0	0	0	0	0
FBtr0084589	Hsp68	0.978509	0.508477	0.927324	0.313213	0.301213	0.785191	1.06038	0.194837	0	0	0	0	0	0
FBtr0077505	CG15422	-0.255949	0.995616	1.29249	0.329056	0.935718	0.503945	1.05882	0.366103	0	0	0	0	0	0
FBtr0071204	Cp38	1.0779	0.525732	0.313278	0.775112	0.787426	0.467108	1.05868	0.248193	0	0	0	0	0	0
FBtr0078550	NA	0.555266	0.854431	0.565244	0.533431	1.18035	0.251076	1.05406	0.201706	0	0	0	0	0	0
FBtr0084627	CG5762	0.0464012	0.996948	0.30459	0.821173	-0.979915	0.457099	1.05376	0.342382	0	0	0	0	0	0
FBtr0072104	CG4019	1.34119	0.457393	0.560418	0.625513	0.293268	0.839959	1.05327	0.302269	0	0	0	0	0	0
FBtr0076788	CG32371	-0.478115	0.944486	-0.185097	0.877562	-0.935291	0.421211	1.04991	0.280977	0	0	0	0	0	0
FBtr0083322	NA	0.0961337	0.995616	0.355909	0.667561	-0.157886	0.885807	1.0499	0.157796	0	0	0	0	0	0
FBtr0086903	CG6484	-0.878654	0.678086	-1.21899	0.248812	-0.711382	0.51278	1.04645	0.252103	0	0	0	0	0	0
FBtr0081050	CG5790	-0.122238	0.995616	-0.146241	0.907852	-0.854874	0.466034	1.04144	0.291447	0	0	0	0	0	0
FBtr0072419	CG2857	0.105122	0.995616	0.485964	0.66009	0.641053	0.588338	1.0401	0.284329	0	0	0	0	0	0
FBtr0079072	cype	-0.320513	0.959787	0.10726	0.908455	-0.0777198	0.947471	1.03964	0.165128	0	0	0	0	0	0
FBtr0080103	CG17098	0.137608	0.995616	0.360314	0.784554	-1.03249	0.427205	1.03822	0.343087	0	0	0	0	0	0
FBtr0076241	CG32069	-0.249005	0.995616	0.207199	0.877261	1.02418	0.429996	1.03767	0.341163	0	0	0	0	0	0
FBtr0087067	CG9010	0.173182	0.995616	0.319608	0.701687	-0.666696	0.440565	1.03643	0.163008	0	0	0	0	0	0
FBtr0088062	TwdlBeta	-0.120364	0.995616	0.273718	0.800638	0.960805	0.369755	1.0358	0.245713	0	0	0	0	0	0
FBtr0075314	CG4101	-1.15935	0.297375	0.135759	0.877009	0.754709	0.378243	1.03469	0.15543	0	0	0	0	0	0
FBtr0077863	CG15353	2.07846	0.126295	-0.274807	0.808692	0.69405	0.53602	1.03342	0.268003	1	0	0	0	0	0
FBtr0082703	l(3)87Df	0.236308	0.995423	0.0412576	0.967965	1.43739	0.145351	1.03143	0.17113	0	0	0	1	0	0
FBtr0080271	Mst33A	-0.834987	0.585655	-0.50512	0.549692	-0.734377	0.41851	1.02683	0.182494	0	0	0	0	0	0
FBtr0086576	NA	0.129768	0.996486	0.331462	0.873829	-1.91214	0.349112	1.02552	0.555515	0	0	0	0	0	0
FBtr0072057	CG13559	0.249727	0.995423	1.14894	0.220467	1.19216	0.23749	1.0216	0.203855	0	0	0	0	0	0
FBtr0084948	CG14540	-0.0685681	0.996486	0.339378	0.79814	-1.01733	0.433517	1.01994	0.351767	0	0	0	0	0	0
FBtr0072902	yellow-g	2.58237	0.399664	1.88532	0.356921	0.643886	0.796982	1.01976	0.592765	0	0	0	0	0	0
FBtr0081739	CG10919	0.171888	0.995616	0.711202	0.556103	-0.669431	0.614786	1.01823	0.350626	0	0	0	0	0	0
FBtr0072850	NA	0.158969	0.995616	0.565911	0.501658	-0.108561	0.926513	1.01791	0.188343	0	0	0	0	0	0
FBtr0088494	CG1648	0.87624	0.702217	-0.300853	0.789949	0.431469	0.721642	1.01713	0.278528	0	0	0	0	0	0
FBtr0086222	bl	0.812188	0.728206	0.0488722	0.969393	2.22634	0.0760098	1.01613	0.265883	0	0	0	1	0	0
FBtr0075467	NA	-0.0643075	0.996486	-0.170975	0.853108	0.9346	0.312724	1.01304	0.186088	0	0	0	0	0	0
FBtr0082314	CG14691	-0.130914	0.995616	-0.191804	0.827305	-0.176472	0.869046	1.01039	0.171323	0	0	0	0	0	0
FBtr0073183	CG32263	0.239619	0.995423	0.0615605	0.951161	0.450164	0.63194	1.00738	0.189884	0	0	0	0	0	0
FBtr0075685	CG13477	-0.192018	0.995616	0.0900942	0.919253	-0.303098	0.733635	1.00737	0.151622	0	0	0	0	0	0
FBtr0075355	Baldspot	0.408562	0.932658	-0.745266	0.390619	0.850224	0.362665	1.00466	0.199196	0	0	0	0	0	0
FBtr0080254	CG4988	0.0819794	0.995616	0.154308	0.86414	-0.328399	0.728805	0.999602	0.177743	0	0	0	0	0	0
FBtr0072915	CG5704	-0.135924	0.995616	-0.414127	0.628432	0.596929	0.511697	0.996253	0.195254	0	0	0	0	0	0
FBtr0075291	CG6652	0.0810369	0.995718	0.424293	0.680507	-0.63014	0.562768	0.995703	0.268003	0	0	0	0	0	0
FBtr0086073	Fis1	0.00116745	0.999833	-0.801838	0.415837	1.00904	0.348711	0.994735	0.263299	0	0	0	0	0	0
FBtr0083751	CG5835	0.630828	0.759933	0.58103	0.480618	-0.184709	0.86607	0.993261	0.188926	0	0	0	0	0	0
FBtr0074382	CG4955	0.260948	0.987726	0.446727	0.598618	-0.0678042	0.957223	0.99312	0.195744	0	0	0	0	0	0
FBtr0077048	CG6610	-0.204716	0.995616	-0.134723	0.907852	1.0199	0.35424	0.992918	0.274562	0	0	0	0	0	0
FBtr0081552	Ubc84D	-0.305862	0.964421	0.563798	0.476669	0.380123	0.675679	0.991868	0.175026	0	0	0	0	0	0
FBtr0084417	CG10164	0.0304645	0.997933	0.409059	0.720077	-0.657294	0.580159	0.991498	0.310877	0	0	0	0	0	0
FBtr0076281	CG12362	-0.304966	0.985322	-0.0291783	0.979196	-0.842283	0.40886	0.99119	0.246646	0	0	0	0	0	0
FBtr0086727	CG15068	-0.103308	0.995718	-0.31772	0.820182	-0.403955	0.798943	0.990855	0.389699	0	0	0	0	0	0
FBtr0076175	CG7557	0.195825	0.995616	0.551934	0.652695	-0.748141	0.566899	0.990796	0.358503	0	0	0	0	0	0
FBtr0081897	mRpS18A	0.166592	0.995616	1.15391	0.164822	0.893907	0.292853	0.990478	0.159887	0	0	0	0	0	0
FBtr0071829	NA	-0.5383	0.814887	-0.431814	0.586715	-0.161379	0.8807	0.989185	0.173344	0	0	0	0	0	0
FBtr0079315	CG11327	-0.149353	0.995616	0.539153	0.642688	-0.582996	0.650472	0.987932	0.338457	0	0	0	0	0	0
FBtr0086807	CG10912	0.166552	0.995616	0.196061	0.813232	0.740909	0.366029	0.987144	0.157312	0	0	0	0	0	0
FBtr0071544	Cht12	0.497427	0.931225	0.435456	0.682434	0.181111	0.896875	0.984276	0.288042	0	0	0	0	0	0
FBtr0071567	CG9394	0.124626	0.995616	-0.0508469	0.96689	0.602428	0.57195	0.983735	0.26621	0	0	0	0	0	0
FBtr0080421	CG5075	0.0683109	0.995616	0.163929	0.843998	-0.466959	0.568817	0.983356	0.157664	0	0	0	0	0	0
FBtr0085948	NA	-0.0368713	0.996486	-0.0331989	0.974087	-0.562937	0.505603	0.981143	0.17407	0	0	0	0	0	0
FBtr0084122	CG15498	-0.196298	0.995616	0.212721	0.804266	-0.575163	0.493087	0.980663	0.172286	0	0	0	0	0	0
FBtr0089625	TBPH	1.70916	0.154618	0.569273	0.528704	3.08375	0.0131584	0.978172	0.233294	0	0	0	1	0	0
FBtr0079874	Bka	0.971578	0.506736	1.51452	0.130052	2.1423	0.056384	0.97708	0.224014	0	1	0	1	0	0
FBtr0086074	NA	-0.0493482	0.996486	-0.682293	0.447654	0.893486	0.362444	0.976239	0.233294	0	0	0	0	0	0
FBtr0076866	CG14835	-0.228496	0.995616	0.917999	0.298971	-0.599382	0.516287	0.975927	0.20835	0	0	0	0	0	0
FBtr0073232	CG1311	0.24711	0.995616	-1.0959	0.394847	1.06461	0.435758	0.974861	0.396961	0	0	0	0	0	0
FBtr0087757	CG4712	0.261359	0.994356	0.64162	0.466643	-0.497991	0.609397	0.973822	0.226172	0	0	0	0	0	0
FBtr0083380	Actn3	0.127354	0.995616	0.419463	0.677017	-0.461175	0.677488	0.973799	0.267876	0	0	0	0	0	0
FBtr0074569	CG32548	0.221196	0.995616	0.241363	0.785492	-0.120971	0.914966	0.973659	0.191311	0	0	0	0	0	0
FBtr0078617	Obp83g	1.07359	0.753778	0.0689313	0.968572	0.91853	0.543875	0.970147	0.443106	0	0	0	0	0	0
FBtr0072340	CG4692	0.389556	0.995423	-1.69079	0.229589	0.813988	0.575891	0.969773	0.421805	0	0	0	0	0	0
FBtr0072107	CG17664	0.311281	0.959787	0.652653	0.408204	0.125623	0.906965	0.969477	0.178169	0	0	0	0	0	0
FBtr0091648	NA	-0.417853	0.929023	-0.352169	0.692865	-0.0562117	0.965236	0.969187	0.213572	0	0	0	0	0	0
FBtr0073938	Ag5r2	1.05589	0.588223	1.30396	0.245222	0.688464	0.555544	0.967582	0.316139	0	0	0	0	0	0
FBtr0077561	CG3213	0.0582744	0.997089	0.365254	0.833582	-1.38437	0.414451	0.965851	0.502792	0	0	0	0	0	0
FBtr0080272	Mst33A	-0.982924	0.451347	-0.693808	0.404292	-0.738739	0.407125	0.965767	0.197803	0	0	0	0	0	0
FBtr0072916	CG15879	0.195934	0.995616	0.206448	0.851005	-0.2249	0.864064	0.965705	0.283971	0	0	0	0	0	0
FBtr0070655	mRpL33	-0.145783	0.995616	0.459497	0.582912	0.826691	0.361853	0.963823	0.202955	0	0	0	0	0	0
FBtr0081173	CG17572	-0.252973	0.995423	0.891108	0.340139	0.84126	0.397796	0.963247	0.246905	0	0	0	0	0	0
FBtr0076485	CG3982	-0.0122718	0.99897	0.249046	0.816425	-1.04825	0.326852	0.9619	0.276115	0	0	0	0	0	0
FBtr0077377	CG11929	0.181691	0.995616	0.297899	0.839889	-0.794027	0.586625	0.961846	0.42483	0	0	0	0	0	0
FBtr0088563	NA	-0.214977	0.995423	0.032652	0.97377	-0.246427	0.795818	0.961104	0.172185	0	0	0	0	0	0
FBtr0073366	CG18418	0.0982673	0.995616	0.61126	0.585128	-0.585676	0.637986	0.959026	0.341163	0	0	0	0	0	0
FBtr0075374	CG33060	-0.375435	0.940411	0.739118	0.377319	0.334332	0.729396	0.958819	0.201706	0	0	0	0	0	0
FBtr0072007	CG11079	0.664393	0.77158	1.54635	0.126141	1.08909	0.274146	0.955704	0.236224	0	1	0	0	0	0
FBtr0087663	CG30065	-0.227077	0.995616	1.0673	0.315733	-0.77039	0.489177	0.955367	0.306594	0	0	0	0	0	0
FBtr0083429	CG18213	-0.878344	0.878846	-1.364	0.374352	0.127085	0.954532	0.954561	0.489478	0	0	0	0	0	0
FBtr0073363	CG12493	-1.01427	0.572637	0.250571	0.820412	-0.589581	0.592803	0.954431	0.291754	0	0	0	0	0	0
FBtr0074481	RhoGAPp190	0.314216	0.995616	1.00126	0.400446	1.39288	0.289524	0.953515	0.368514	0	0	0	0	0	0
FBtr0080335	CG7142	-1.55831	0.108891	-0.903732	0.244055	0.92662	0.266955	0.951235	0.164181	-1	0	0	0	0	0
FBtr0084832	NA	-0.13785	0.995616	0.294611	0.73691	-0.27222	0.790303	0.950388	0.204297	0	0	0	0	0	0
FBtr0070486	CG2709	0.74905	0.59933	1.80199	0.0539713	0.965711	0.266069	0.948472	0.178757	0	1	0	0	0	0
FBtr0080176	NA	0.311229	0.994356	0.355789	0.752688	-0.832643	0.461488	0.946749	0.319171	0	0	0	0	0	0
FBtr0071655	NA	0.05376	0.996486	0.162494	0.870323	-0.565813	0.558961	0.946302	0.238709	0	0	0	0	0	0
FBtr0083319	NA	-0.194462	0.995616	0.24032	0.790901	-1.12628	0.236559	0.945549	0.21059	0	0	0	0	0	0
FBtr0080797	NA	-0.370449	0.950928	0.152493	0.876988	-0.71168	0.45507	0.944134	0.238836	0	0	0	0	0	0
FBtr0076861	Tsp66A	0.263809	0.977984	0.188374	0.822884	-0.720704	0.385703	0.943876	0.178649	0	0	0	0	0	0
FBtr0075900	CG10748	0.0525471	0.996486	0.357205	0.752428	0.0456016	0.977431	0.943029	0.322277	0	0	0	0	0	0
FBtr0075666	CG18581	-0.22111	0.995616	0.180243	0.860681	0.755583	0.447696	0.941753	0.260661	0	0	0	0	0	0
FBtr0081048	CG15155	0.923548	0.478074	0.907123	0.274366	0.766386	0.377332	0.941445	0.195922	0	0	0	0	0	0
FBtr0084809	CG11852	0.870709	0.44903	-0.282611	0.710449	0.852484	0.293666	0.941084	0.161852	0	0	0	0	0	0
FBtr0070391	NA	2.14679	0.282749	0.0415471	0.979777	1.376	0.376528	0.939937	0.471397	0	0	0	0	0	0
FBtr0082426	CG14718	-0.259698	0.995423	0.173704	0.859837	-0.91221	0.348476	0.938908	0.243355	0	0	0	0	0	0
FBtr0086286	CG16739	-0.767543	0.815949	-0.049838	0.972455	-0.15805	0.919782	0.938779	0.357707	0	0	0	0	0	0
FBtr0075292	CG6652	0.219113	0.995616	0.426186	0.700872	-0.667556	0.567563	0.938129	0.331068	0	0	0	0	0	0
FBtr0077740	CG9961	-1.20982	0.267943	0.0151958	0.987387	-0.693237	0.417585	0.937349	0.194747	0	0	0	0	0	0
FBtr0077630	CG31950	0.189352	0.995616	1.37122	0.176634	0.975772	0.340859	0.936143	0.268042	0	0	0	0	0	0
FBtr0070786	NA	0.272173	0.995616	0.370676	0.810727	-0.48176	0.781721	0.935179	0.465871	0	0	0	0	0	0
FBtr0078624	jagn	0.633409	0.939076	-0.852846	0.537376	1.15859	0.433517	0.935089	0.455705	0	0	0	0	0	0
FBtr0088351	CG12907	-0.268725	0.995546	0.0946197	0.935871	-0.881777	0.408471	0.931731	0.293714	0	0	0	0	0	0
FBtr0088747	LvpD	-0.247553	0.995423	-0.675688	0.426493	0.35212	0.721654	0.929151	0.22838	0	0	0	0	0	0
FBtr0077440	CG15434	0.443971	0.939436	0.701921	0.466037	0.721681	0.488097	0.929089	0.287477	0	0	0	0	0	0
FBtr0078478	Act79B	0.407678	0.954206	-0.400976	0.696365	1.10058	0.316167	0.927263	0.30061	0	0	0	0	0	0
FBtr0070776	CG16756	1.27844	0.237553	0.637629	0.423274	1.80104	0.0699137	0.923828	0.202178	0	0	0	1	0	0
FBtr0085736	CG15554	-0.155314	0.995616	0.493325	0.533062	0.405287	0.649498	0.923081	0.199754	0	0	0	0	0	0
FBtr0077789	NA	0.993106	0.364516	0.211572	0.79112	0.0795345	0.939381	0.922803	0.172171	0	0	0	0	0	0
FBtr0076700	CG13678	-0.17648	0.995616	-0.021203	0.987371	0.280112	0.842396	0.922683	0.351767	0	0	0	0	0	0
FBtr0073174	NA	0.046367	0.997094	-1.74522	0.197229	0.791308	0.566699	0.921017	0.421354	0	0	0	0	0	0
FBtr0089870	CG3566	0.732188	0.658423	1.23799	0.164321	0.830877	0.352032	0.919223	0.214559	0	0	0	0	0	0
FBtr0075072	NA	0.0221948	0.998597	0.55754	0.622998	-0.499176	0.698415	0.91896	0.362327	0	0	0	0	0	0
FBtr0079769	NA	0.0631586	0.996486	0.0928652	0.927646	0.231274	0.834715	0.918714	0.241128	0	0	0	0	0	0
FBtr0075369	Nplp3	0.259144	0.989031	-0.658016	0.438569	0.694051	0.447948	0.917821	0.234678	0	0	0	0	0	0
FBtr0085172	CG3348	0.865075	0.740858	1.41727	0.223155	0.659601	0.584907	0.917096	0.356791	0	0	0	0	0	0
FBtr0083146	Rh6	-0.293017	0.988615	0.140396	0.897886	1.25262	0.250282	0.916903	0.289489	0	0	0	0	0	0
FBtr0075464	CG13068	0.901955	0.725351	-0.124568	0.924737	0.690221	0.570852	0.916604	0.362327	0	0	0	0	0	0
FBtr0086973	CG9642	0.595028	0.719223	0.129001	0.873848	0.215995	0.814389	0.916114	0.171409	0	0	0	0	0	0
FBtr0087481	CG12861	-0.104425	0.996486	0.477805	0.799901	-1.5278	0.408917	0.915324	0.568644	0	0	0	0	0	0
FBtr0074103	CG8565	0.0832006	0.996486	0.167292	0.942238	-1.5558	0.455365	0.913373	0.624548	0	0	0	0	0	0
FBtr0086472	CG11018	-0.0286899	0.997933	0.27503	0.776134	-0.838116	0.387738	0.913164	0.259335	0	0	0	0	0	0
FBtr0077934	CG18131	2.10437	0.1406	1.601	0.172653	-0.536931	0.661601	0.911318	0.352016	1	0	0	0	0	0
FBtr0072089	CG12491	0.718248	0.549947	1.2902	0.106752	1.45124	0.089842	0.91076	0.15396	0	1	0	1	0	0
FBtr0074405	xmas-1	0.30768	0.985322	2.35407	0.0478008	-0.66045	0.525834	0.910713	0.292343	0	1	0	0	0	0
FBtr0086667	CG15065	-2.13267	0.0775131	-0.238055	0.813832	-0.087021	0.948442	0.90787	0.272882	-1	0	0	0	0	0
FBtr0084730	CG13640	0.836596	0.790486	-1.30278	0.278227	0.16154	0.91979	0.907458	0.38603	0	0	0	0	0	0
FBtr0073404	Ork1	0.167189	0.995616	1.11091	0.171086	0.245031	0.792551	0.90706	0.185152	0	0	0	0	0	0
FBtr0085487	NA	0.0431496	0.996486	0.410588	0.566174	-0.32673	0.68999	0.907055	0.168888	0	0	0	0	0	0
FBtr0082046	betaTub85D	-0.026438	0.998025	-0.0506744	0.968388	-0.987685	0.370856	0.90669	0.322321	0	0	0	0	0	0
FBtr0077336	Peritrophin-A	0.581675	0.97036	-0.81122	0.609039	0.693273	0.700637	0.906686	0.530979	0	0	0	0	0	0
FBtr0083734	CG14282	0.71984	0.683765	0.402377	0.635273	0.110894	0.923336	0.906576	0.231698	0	0	0	0	0	0
FBtr0079483	CG7196	1.5748	0.503826	-0.597255	0.685415	-0.88512	0.568397	0.906149	0.485049	0	0	0	0	0	0
FBtr0082785	Act87E	0.19133	0.995616	-2.24219	0.0863177	0.574211	0.64372	0.905863	0.3632	0	-1	0	0	0	0
FBtr0087479	CG30479	0.0641138	0.996486	1.16881	0.2144	1.1302	0.26066	0.90498	0.259949	0	0	0	0	0	0
FBtr0074785	mRpS14	0.487163	0.882786	1.29628	0.162945	1.23919	0.208666	0.903761	0.240876	0	0	0	0	0	0
FBtr0074515	CG7135	-0.286202	0.990891	0.218349	0.834791	0.784383	0.442147	0.9036	0.290239	0	0	0	0	0	0
FBtr0077526	CG8851	0.0939801	0.995616	0.338009	0.632565	-0.208759	0.81212	0.902806	0.160657	0	0	0	0	0	0
FBtr0079282	CG9498	0.0461054	0.996486	-0.582128	0.46054	-0.313843	0.736309	0.90249	0.208708	0	0	0	0	0	0
FBtr0075309	CG4169	0.641711	0.896062	0.539417	0.648337	0.0523878	0.976045	0.901328	0.390201	0	0	0	0	0	0
FBtr0087741	Dp	0.163062	0.995616	-0.607411	0.465902	0.62764	0.485356	0.899272	0.236623	0	0	0	0	0	0
FBtr0078518	CG14456	1.55358	0.0817907	0.465639	0.489389	0.107519	0.908007	0.899162	0.151622	1	0	0	0	0	0
FBtr0082764	mRpS21	0.264446	0.980027	1.01663	0.222124	0.840512	0.326891	0.899146	0.207917	0	0	0	0	0	0
FBtr0081695	Ccp84Af	-0.0924742	0.995616	-0.102269	0.914357	0.735144	0.405048	0.898856	0.224523	0	0	0	0	0	0
FBtr0089669	SIP2	-0.0462382	0.998044	0.4743	0.82487	-2.17171	0.315522	0.89847	0.634734	0	0	0	0	0	0
FBtr0075132	CG5103	0.0151711	0.99897	-0.133704	0.908455	-0.82929	0.445522	0.89846	0.324347	0	0	0	0	0	0
FBtr0089222	CG11077	-0.109091	0.995616	-0.468142	0.584247	0.781454	0.39641	0.897569	0.244133	0	0	0	0	0	0
FBtr0087023	Arp53D	-0.112064	0.995616	0.416138	0.691924	-1.11708	0.317736	0.8974	0.326394	0	0	0	0	0	0
FBtr0088932	NA	0.0763355	0.996486	-1.35885	0.319335	0.266076	0.884027	0.896946	0.459772	0	0	0	0	0	0
FBtr0070749	dhd	-0.316497	0.995616	-0.193925	0.902414	1.06875	0.473588	0.896503	0.478434	0	0	0	0	0	0
FBtr0079385	NA	0.339348	0.963185	0.210641	0.825877	-0.448633	0.649283	0.894032	0.258904	0	0	0	0	0	0
FBtr0070341	moody	0.01673	0.998597	-0.661424	0.425663	0.624716	0.483455	0.894018	0.234757	0	0	0	0	0	0
FBtr0088364	NA	0.0567145	0.996486	-0.033899	0.971397	-0.0562264	0.959248	0.893858	0.185654	0	0	0	0	0	0
FBtr0071510	CG1628	0.438493	0.931225	0.642839	0.477238	-0.197085	0.872008	0.893303	0.276322	0	0	0	0	0	0
FBtr0080501	CG16848	0.960392	0.363249	-0.221687	0.772624	-0.690139	0.370464	0.892868	0.171253	0	0	0	0	0	0
FBtr0085459	CG18731	0.571117	0.909362	-0.370776	0.751507	1.29133	0.289639	0.892191	0.363644	0	0	0	0	0	0
FBtr0075687	CG13476	-0.766605	0.604093	-0.536313	0.497135	0.0506599	0.965888	0.891484	0.215823	0	0	0	0	0	0
FBtr0077294	hydra	0.0470647	0.997933	0.258703	0.884687	-1.47682	0.393039	0.889251	0.550439	0	0	0	0	0	0
FBtr0088153	Tapdelta	-0.221412	0.995616	-0.210485	0.843483	0.678577	0.513281	0.888889	0.305233	0	0	0	0	0	0
FBtr0083712	NP15.6	0.665701	0.77158	0.512344	0.565666	0.794364	0.408852	0.888107	0.268758	0	0	0	0	0	0
FBtr0070365	CG14817	0.246007	0.976335	0.59552	0.40132	0.611381	0.41851	0.887409	0.169352	0	0	0	0	0	0
FBtr0072293	CG3483	0.0882844	0.995616	0.546202	0.537281	0.672049	0.478879	0.886473	0.266527	0	0	0	0	0	0
FBtr0085194	RpS10a	-0.101612	0.995616	3.48094	0.00135284	-0.222036	0.796982	0.886032	0.166445	0	1	0	0	0	0
FBtr0082731	CG14384	-0.315007	0.995423	-0.268982	0.824253	-0.138559	0.928632	0.885526	0.373919	0	0	0	0	0	0
FBtr0081152	CG17344	-0.740267	0.818319	-1.06628	0.343291	-1.16117	0.335147	0.883928	0.375899	0	0	0	0	0	0
FBtr0084698	CG6980	0.201759	0.995616	-0.201376	0.811035	-0.269991	0.774055	0.882929	0.204495	0	0	0	0	0	0
FBtr0079997	Sps2	0.0576727	0.995616	-0.550514	0.408204	0.643517	0.371407	0.881122	0.151027	0	0	0	0	0	0
FBtr0087999	CG13168	0.32968	0.995616	0.232649	0.868528	-1.06503	0.430506	0.880531	0.439758	0	0	0	0	0	0
FBtr0077544	CG10031	0.744143	0.542775	0.665586	0.357289	1.14944	0.172606	0.880344	0.176754	0	0	0	0	0	0
FBtr0077584	CG33281	0.829318	0.457393	-0.272125	0.710401	0.37233	0.633842	0.879287	0.172219	0	0	0	0	0	0
FBtr0083891	CG4323	-0.0475046	0.996486	0.0385164	0.976653	-0.351907	0.790005	0.879124	0.358729	0	0	0	0	0	0
FBtr0084577	mRpS24	0.455508	0.956957	1.86362	0.137332	0.781397	0.522397	0.878329	0.38952	0	1	0	0	0	0
FBtr0083640	fru	0.454696	0.98306	1.10217	0.422949	-0.617215	0.69592	0.877981	0.482378	0	0	0	0	0	0
FBtr0080980	CG5043	-0.11515	0.995616	0.186155	0.907852	-1.40982	0.353983	0.87745	0.490695	0	0	0	0	0	0
FBtr0078517	CG14457	-0.271185	0.959787	0.547424	0.426092	0.166427	0.851192	0.876036	0.167241	0	0	0	0	0	0
FBtr0075817	CG10710	0.58368	0.931225	0.00207087	0.998905	0.33063	0.830738	0.874874	0.427647	0	0	0	0	0	0
FBtr0081034	CG15152	0.0198581	0.998025	0.456391	0.537625	0.844489	0.301458	0.874487	0.194747	0	0	0	0	0	0
FBtr0076735	mRpL36	0.292283	0.995423	1.4677	0.188184	0.954276	0.396973	0.873971	0.353153	0	0	0	0	0	0
FBtr0075057	HipHop	-0.591441	0.893428	-0.371296	0.742897	-0.103501	0.946086	0.873593	0.360007	0	0	0	0	0	0
FBtr0070069	CG12470	0.793381	0.797217	0.687978	0.538064	-0.447194	0.732712	0.872772	0.386427	0	0	0	0	0	0
FBtr0080800	CG10839	0.0418853	0.996486	0.335227	0.629539	-0.38993	0.604264	0.872141	0.167668	0	0	0	0	0	0
FBtr0072791	CG2021	-0.00248837	0.999741	0.190385	0.823234	1.13414	0.207243	0.870145	0.215371	0	0	0	0	0	0
FBtr0080132	w-cup	-1.13858	0.652529	-0.714895	0.571703	-1.52584	0.279831	0.869041	0.450103	0	0	0	0	0	0
FBtr0078254	CG4365	0.345727	0.94582	1.2267	0.15347	0.330341	0.71863	0.867369	0.224164	0	0	0	0	0	0
FBtr0079264	CG9548	-0.377032	0.931225	0.645844	0.409783	0.742089	0.380987	0.866819	0.221131	0	0	0	0	0	0
FBtr0087126	CG7813	-0.0238368	0.998044	0.712357	0.49405	-1.29639	0.270773	0.865947	0.358503	0	0	0	0	0	0
FBtr0088200	Obp47a	-0.278517	0.976335	-0.252039	0.767956	1.4195	0.140421	0.865122	0.228906	0	0	0	1	0	0
FBtr0085068	CG18472	-0.394053	0.957605	-0.135144	0.903841	-0.303683	0.804954	0.863645	0.327976	0	0	0	0	0	0
FBtr0084147	CG31465	0.698673	0.822385	2.596	0.0478008	0.0700488	0.964827	0.863085	0.364748	0	1	0	0	0	0
FBtr0086171	Tsp42Ea	-0.107301	0.995616	0.347535	0.594989	0.191693	0.814845	0.862689	0.151171	0	0	0	0	0	0
FBtr0083256	CG31287	0.447515	0.823568	0.41637	0.540327	-0.15904	0.856359	0.862539	0.168214	0	0	0	0	0	0
FBtr0082686	CG10126	0.116131	0.995616	0.0709392	0.936864	0.800974	0.326891	0.862276	0.20549	0	0	0	0	0	0
FBtr0073281	Dpy-30L2	0.356674	0.995616	0.870485	0.693115	-1.83727	0.421644	0.862091	0.680491	0	0	0	0	0	0
FBtr0080415	ACXA	-0.0513586	0.996486	0.316272	0.751507	-0.589134	0.562898	0.861766	0.304676	0	0	0	0	0	0
FBtr0082460	CG6790	0.15769	0.995616	0.442382	0.658395	-0.441823	0.693675	0.860845	0.327976	0	0	0	0	0	0
FBtr0080413	ACXC	0.450846	0.952231	0.243497	0.840847	-0.974681	0.409522	0.860235	0.384091	0	0	0	0	0	0
FBtr0080855	twe	-0.430745	0.862163	-0.152924	0.846433	-0.650124	0.401791	0.858591	0.189481	0	0	0	0	0	0
FBtr0079904	CG33300	-2.04367	0.623895	-4.68999	0.0717166	0.821352	0.752548	0.858483	0.689211	0	-1	0	0	0	0
FBtr0087998	CG13168	0.295735	0.995616	0.177131	0.897907	-0.982551	0.452643	0.858424	0.437039	0	0	0	0	0	0
FBtr0086179	Tsp42Ec	-0.668264	0.584228	-0.252354	0.720661	0.715842	0.327085	0.856815	0.167241	0	0	0	0	0	0
FBtr0080120	CG6737	0.33389	0.932658	0.381099	0.588874	0.843979	0.28223	0.854335	0.183267	0	0	0	0	0	0
FBtr0073010	CG9970	-0.0321328	0.99686	0.193342	0.826696	-0.354626	0.703898	0.854161	0.242639	0	0	0	0	0	0
FBtr0083662	CG31231	0.326746	0.940444	0.688335	0.34644	-0.541839	0.483455	0.854088	0.193495	0	0	0	0	0	0
FBtr0078453	CG14566	0.305577	0.942474	1.62908	0.0505028	0.283923	0.718879	0.853763	0.17113	0	1	0	0	0	0
FBtr0071521	CG9313	-0.325347	0.995616	-0.234574	0.859837	-1.02485	0.426393	0.853493	0.432603	0	0	0	0	0	0
FBtr0086045	Tsp42A	-0.17815	0.995616	0.00193047	0.998315	-0.236877	0.770906	0.853435	0.165428	0	0	0	0	0	0
FBtr0072637	LysX	1.83249	0.261231	2.25073	0.103945	1.64361	0.228307	0.853418	0.42815	0	1	0	0	0	0
FBtr0073169	NA	0.418336	0.909362	0.75497	0.352085	0.507346	0.560462	0.852442	0.238709	0	0	0	0	0	0
FBtr0083248	glob1	1.53219	0.15075	-0.8965	0.280192	1.24337	0.190611	0.852185	0.241084	0	0	0	0	0	0
FBtr0071068	ct	0.135141	0.995616	-1.1599	0.230216	0.863825	0.386241	0.84986	0.303846	0	0	0	0	0	0
FBtr0072979	CG2113	-0.953795	0.414224	-0.776178	0.317244	-0.57932	0.477132	0.849812	0.216272	0	0	0	0	0	0
FBtr0072164	PebIII	0.18308	0.995616	-0.339693	0.65974	0.558278	0.489145	0.849166	0.212813	0	0	0	0	0	0
FBtr0085947	CG31601	1.13967	0.620997	0.255851	0.847464	-0.231777	0.888406	0.848167	0.438837	0	0	0	0	0	0
FBtr0079055	Jon25Bii	0.665522	0.638026	0.779535	0.296972	0.703597	0.370988	0.847291	0.198747	0	0	0	0	0	0
FBtr0075089	CG12477	-0.437643	0.894255	0.648979	0.41135	0.114567	0.916503	0.845971	0.236335	0	0	0	0	0	0
FBtr0091938	NA	-0.044831	0.997089	-0.0827323	0.954586	-1.29687	0.326891	0.843904	0.444549	0	0	0	0	0	0
FBtr0087002	CG15605	-0.776442	0.504658	-0.0414206	0.960954	0.0612857	0.952806	0.843184	0.189269	0	0	0	0	0	0
FBtr0073945	mRpS25	0.112827	0.995616	1.01055	0.218913	0.793961	0.348824	0.843084	0.230971	0	0	0	0	0	0
FBtr0080007	mRpS7	0.363174	0.894255	0.667369	0.318039	0.765916	0.292834	0.842829	0.162282	0	0	0	0	0	0
FBtr0081878	CG8021	0.51576	0.92016	1.38065	0.204955	0.809823	0.45945	0.842566	0.360007	0	0	0	0	0	0
FBtr0072949	CG14949	0.629769	0.873459	1.09125	0.320764	0.397595	0.759436	0.841458	0.385967	0	0	0	0	0	0
FBtr0086700	Pepck	0.161584	0.995616	-0.559674	0.464456	0.229437	0.812782	0.840415	0.228076	0	0	0	0	0	0
FBtr0078309	CG12975	0.0721319	0.995616	0.730668	0.305896	1.05042	0.197791	0.840206	0.184738	0	0	0	0	0	0
FBtr0072002	CG9861	0.190857	0.995616	0.359292	0.736797	-0.910396	0.401941	0.839698	0.355269	0	0	0	0	0	0
FBtr0070832	CG15766	-0.0622712	0.996486	-0.686764	0.490662	1.26685	0.263849	0.839531	0.354517	0	0	0	0	0	0
FBtr0082326	CG4683	-0.204919	0.995616	0.679185	0.479018	-0.473718	0.665586	0.838327	0.3366	0	0	0	0	0	0
FBtr0073989	CG14407	0.409859	0.882639	0.851629	0.253891	0.622011	0.41851	0.838183	0.197256	0	0	0	0	0	0
FBtr0073089	CG14968	-0.168246	0.995616	-0.531712	0.411284	0.38994	0.580159	0.837854	0.1596	0	0	0	0	0	0
FBtr0076378	CG14177	-0.0625838	0.995808	-0.249551	0.764775	1.60116	0.0941771	0.837267	0.234509	0	0	0	1	0	0
FBtr0083171	CG5614	-0.157305	0.995616	-0.151733	0.893446	-1.09963	0.320369	0.836994	0.358188	0	0	0	0	0	0
FBtr0078992	Marcal1	-0.407339	0.834405	-0.276756	0.670992	0.190544	0.811135	0.83568	0.152839	0	0	0	0	0	0
FBtr0078343	CG32436	-0.569608	0.84395	-0.829743	0.367307	-0.974659	0.325208	0.835354	0.306181	0	0	0	0	0	0
FBtr0072437	NA	0.286189	0.959787	0.804603	0.28343	1.14968	0.182194	0.834516	0.205051	0	0	0	0	0	0
FBtr0083951	CG15922	0.35223	0.985322	1.43106	0.220475	1.14553	0.341772	0.832816	0.403337	0	0	0	0	0	0
FBtr0091643	NA	-0.573687	0.797217	0.0225045	0.980695	-0.131882	0.90513	0.832441	0.255768	0	0	0	0	0	0
FBtr0086804	CG5084	-1.58754	0.0874915	-0.72234	0.317827	0.631174	0.408511	0.832179	0.196194	-1	0	0	0	0	0
FBtr0086090	CG33347	-0.408686	0.917556	-1.31218	0.140317	0.584934	0.49756	0.831931	0.252161	0	-1	0	0	0	0
FBtr0079025	CG8680	0.760529	0.48457	0.339102	0.614392	0.829409	0.268463	0.831874	0.173215	0	0	0	0	0	0
FBtr0080506	NA	0.122116	0.995616	-0.677204	0.344962	0.963288	0.232236	0.830746	0.196192	0	0	0	0	0	0
FBtr0070731	CG2861	0.426225	0.976377	0.633915	0.609893	-0.143795	0.933533	0.829933	0.456895	0	0	0	0	0	0
FBtr0073438	CG15202	0.136447	0.995616	0.268324	0.677012	0.383156	0.57195	0.829526	0.15007	0	0	0	0	0	0
FBtr0080137	CG31870	0.42157	0.95661	-0.253369	0.823802	0.817826	0.461259	0.82864	0.374447	0	0	0	0	0	0
FBtr0082762	CG14375	0.954773	0.684131	-1.42209	0.223456	0.687729	0.568506	0.828609	0.40863	0	0	0	0	0	0
FBtr0080177	CG14070	0.241969	0.979822	0.33753	0.645911	0.415525	0.598196	0.828409	0.205051	0	0	0	0	0	0
FBtr0076941	NA	-0.140835	0.995616	-2.20127	0.177782	1.03296	0.52794	0.826703	0.556685	0	0	0	0	0	0
FBtr0080668	NA	0.291295	0.956957	0.386802	0.592232	0.549901	0.47585	0.826371	0.204992	0	0	0	0	0	0
FBtr0072631	LysS	0.950655	0.314589	0.112075	0.87948	0.746531	0.30682	0.823704	0.175049	0	0	0	0	0	0
FBtr0073207	CG14989	0.314674	0.962688	0.0917824	0.923237	0.862463	0.327155	0.821617	0.261955	0	0	0	0	0	0
FBtr0073139	CG10862	-0.106116	0.995616	0.546326	0.620186	-0.889562	0.44654	0.820458	0.404266	0	0	0	0	0	0
FBtr0073629	NA	-0.593194	0.904493	0.903836	0.416408	-0.741	0.538385	0.820455	0.414274	0	0	0	0	0	0
FBtr0077877	chinmo	0.0349984	0.996486	-0.30538	0.642588	0.259429	0.732344	0.820228	0.168599	0	0	0	0	0	0
FBtr0083148	CG5213	0.178587	0.995423	0.924519	0.187245	0.264848	0.729133	0.819065	0.172219	0	0	0	0	0	0
FBtr0075370	CG13060	0.252417	0.958471	0.96219	0.161308	0.328686	0.640427	0.818767	0.158851	0	0	0	0	0	0
FBtr0073452	CG11752	0.736372	0.770033	0.64412	0.509613	0.624823	0.56007	0.818087	0.356329	0	0	0	0	0	0
FBtr0080849	cni	0.330289	0.940444	0.0857587	0.919774	1.18789	0.170485	0.817879	0.215478	0	0	0	0	0	0
FBtr0075225	CG13733	0.238989	0.995423	0.330838	0.709135	-0.276099	0.79336	0.817565	0.284574	0	0	0	0	0	0
FBtr0082552	CG14740	0.531491	0.725247	0.246738	0.720743	-0.281992	0.710928	0.816515	0.175701	0	0	0	0	0	0
FBtr0072049	RpL22-like	-0.184861	0.995616	0.43005	0.68602	0.342144	0.787752	0.816211	0.378491	0	0	0	0	0	0
FBtr0072061	levy	0.218256	0.995616	-1.67032	0.34245	0.648847	0.755338	0.815868	0.624325	0	0	0	0	0	0
FBtr0086859	CG10934	0.113182	0.995616	0.214001	0.868542	-1.0778	0.389676	0.814853	0.437039	0	0	0	0	0	0
FBtr0071064	CG15034	0.179678	0.995616	0.770244	0.412372	-0.00968424	0.994416	0.814343	0.335867	0	0	0	0	0	0
FBtr0086574	CG15109	0.200909	0.995616	0.778165	0.680137	-1.75047	0.376528	0.813736	0.644435	0	0	0	0	0	0
FBtr0071084	NA	0.00690397	0.999741	0.657055	0.558447	-0.189716	0.900647	0.813456	0.423592	0	0	0	0	0	0
FBtr0083798	CG6300	0.00331577	0.999741	-0.887316	0.336191	1.22522	0.236127	0.813231	0.319644	0	0	0	0	0	0
FBtr0072404	Phk-3	0.559709	0.8327	0.780171	0.374352	0.550115	0.560511	0.812699	0.297288	0	0	0	0	0	0
FBtr0077901	CG17650	0.461915	0.816383	0.975315	0.186131	0.707081	0.347065	0.812595	0.194747	0	0	0	0	0	0
FBtr0084330	CG4907	-0.414541	0.865721	-0.123005	0.87395	-0.857817	0.272513	0.811901	0.200378	0	0	0	0	0	0
FBtr0074648	CG7349	-0.110058	0.995616	0.437234	0.725983	-0.64205	0.626004	0.810954	0.451844	0	0	0	0	0	0
FBtr0071243	CG32713	0.0588015	0.996486	1.08932	0.247671	-0.0221969	0.986592	0.810204	0.317278	0	0	0	0	0	0
FBtr0074445	CG8664	-0.55236	0.899116	0.57267	0.571103	1.08131	0.326439	0.80974	0.373919	0	0	0	0	0	0
FBtr0072174	RpL12	-0.303822	0.936019	0.109035	0.881034	0.842107	0.254052	0.809431	0.175685	0	0	0	0	0	0
FBtr0077882	mRpL48	0.222909	0.985322	0.948682	0.200046	0.641979	0.392483	0.809379	0.200576	0	0	0	0	0	0
FBtr0074899	schuy	-0.420856	0.904493	0.351295	0.666184	-0.845711	0.326852	0.808327	0.259162	0	0	0	0	0	0
FBtr0089114	Crk	-0.0248708	0.997933	-0.920199	0.30294	0.651712	0.483905	0.806575	0.301202	0	0	0	0	0	0
FBtr0080790	CG31735	0.157743	0.995616	0.683601	0.404504	-0.64504	0.45855	0.806222	0.270825	0	0	0	0	0	0
FBtr0076090	Vha16-3	0.150972	0.995616	0.0996686	0.88378	-0.0160701	0.98606	0.80603	0.152758	0	0	0	0	0	0
FBtr0075871	CG10749	-0.0256975	0.996599	0.133737	0.847926	-0.599944	0.381754	0.805477	0.167685	0	0	0	0	0	0
FBtr0080858	NA	0.243505	0.958471	0.290753	0.637914	0.0134414	0.987844	0.804847	0.152053	0	0	0	0	0	0
FBtr0088362	Syb	-0.21028	0.987241	-0.378424	0.574493	0.923812	0.23087	0.804813	0.189831	0	0	0	0	0	0
FBtr0073383	CG15208	-0.183279	0.995616	0.0527463	0.977153	-0.920058	0.571171	0.804694	0.562646	0	0	0	0	0	0
FBtr0084166	RpI12	0.242733	0.977513	1.05588	0.166508	0.892313	0.261867	0.804523	0.206566	0	0	0	0	0	0
FBtr0083695	CG14298	0.291013	0.995423	0.800262	0.436533	-0.154731	0.912933	0.802994	0.388668	0	0	0	0	0	0
FBtr0080841	NA	0.247124	0.985119	0.710161	0.356278	-0.498747	0.54492	0.801801	0.242286	0	0	0	0	0	0
FBtr0075544	NA	0.0898056	0.995616	0.524454	0.505692	-0.679968	0.424952	0.800346	0.26401	0	0	0	0	0	0
FBtr0089671	SIP2	-0.223839	0.995616	0.084185	0.975067	-2.23845	0.326439	0.799807	0.699624	0	0	0	0	0	0
FBtr0084972	RpL34a	0.147787	0.995616	0.739421	0.364079	0.429369	0.631056	0.799251	0.26847	0	0	0	0	0	0
FBtr0084171	mRpL35	0.176097	0.995616	0.906145	0.236621	0.750795	0.347635	0.798428	0.22797	0	0	0	0	0	0
FBtr0076036	NA	-0.14171	0.995616	-0.0762644	0.936129	-1.06878	0.241124	0.798185	0.268028	0	0	0	0	0	0
FBtr0074521	wupA	0.410982	0.967651	-2.47041	0.0621444	0.36628	0.78686	0.797806	0.421374	0	-1	0	0	0	0
FBtr0091645	NA	-0.282242	0.950378	-0.140396	0.84804	-0.188594	0.822033	0.797508	0.189269	0	0	0	0	0	0
FBtr0088316	CG11825	-0.531347	0.704621	0.698483	0.287819	1.42827	0.0717209	0.797408	0.172269	0	0	0	1	0	0
FBtr0086338	CG30447	-0.135851	0.995616	0.207597	0.815639	-0.524279	0.554398	0.797153	0.276327	0	0	0	0	0	0
FBtr0085935	ttm3	0.201322	0.995368	0.32815	0.63808	-0.236379	0.779873	0.795916	0.202496	0	0	0	0	0	0
FBtr0077527	NA	0.205822	0.995616	0.34162	0.706293	-0.447731	0.647346	0.795722	0.308712	0	0	0	0	0	0
FBtr0087756	CG4714	-0.309885	0.95037	-0.0438513	0.960158	-0.765083	0.334977	0.795048	0.229613	0	0	0	0	0	0
FBtr0082389	NA	-0.0110364	0.99897	0.185029	0.85584	1.15389	0.266608	0.795045	0.339539	0	0	0	0	0	0
FBtr0082538	ssp5	-0.21873	0.995616	0.41914	0.742243	-1.15894	0.370017	0.794383	0.463769	0	0	0	0	0	0
FBtr0089695	Gr89a	-0.623391	0.906765	1.04268	0.381126	0.962884	0.446414	0.793719	0.458136	0	0	0	0	0	0
FBtr0086669	GstE1	-0.564595	0.812476	-0.806936	0.337297	0.387721	0.68022	0.793712	0.286716	0	0	0	0	0	0
FBtr0071150	CG10920	0.228609	0.995616	0.413793	0.691386	-0.33858	0.785191	0.793184	0.381321	0	0	0	0	0	0
FBtr0070099	Cyp4g1	-0.0205472	0.998025	-0.560977	0.453124	-0.228079	0.810586	0.793164	0.244372	0	0	0	0	0	0
FBtr0086481	CG15128	0.166239	0.995616	0.503261	0.788792	-1.48813	0.423454	0.793132	0.634365	0	0	0	0	0	0
FBtr0084255	CG18594	1.04203	0.394553	0.444792	0.582547	0.275451	0.782059	0.791965	0.274775	0	0	0	0	0	0
FBtr0071531	NA	0.604869	0.745026	0.177271	0.835296	0.417146	0.628412	0.791868	0.258364	0	0	0	0	0	0
FBtr0077606	CG9664	1.96902	0.50813	-0.291387	0.884687	0.920966	0.650472	0.791833	0.650427	0	0	0	0	0	0
FBtr0091646	NA	-0.439321	0.916981	-0.0764579	0.939911	-0.208362	0.850745	0.791148	0.30554	0	0	0	0	0	0
FBtr0079163	NA	0.473357	0.875506	0.411463	0.616057	0.58168	0.504995	0.790752	0.279125	0	0	0	0	0	0
FBtr0083372	CG8907	-0.164138	0.995616	0.0492404	0.956542	-0.124363	0.903765	0.789419	0.246125	0	0	0	0	0	0
FBtr0072942	NA	-0.608708	0.684889	-0.950651	0.206618	0.0981787	0.920221	0.789233	0.218312	0	0	0	0	0	0
FBtr0075616	ran-like	0.0204392	0.99897	0.235152	0.86906	-1.01247	0.458	0.788447	0.498864	0	0	0	0	0	0
FBtr0073738	CG12723	-0.20254	0.995616	-0.018787	0.985018	0.928162	0.317894	0.788444	0.299087	0	0	0	0	0	0
FBtr0072452	NA	-0.121352	0.995616	-0.495329	0.7442	0.584874	0.723599	0.787934	0.551463	0	0	0	0	0	0
FBtr0081336	Kua	-0.797772	0.503826	-0.515289	0.471553	-0.404769	0.609292	0.786829	0.228994	0	0	0	0	0	0
FBtr0070198	CG11379	-0.0365818	0.996486	0.191115	0.807959	0.912139	0.26066	0.786199	0.226172	0	0	0	0	0	0
FBtr0075669	Rpn12R	0.024585	0.998025	0.0305289	0.978365	-0.376284	0.728926	0.784734	0.349382	0	0	0	0	0	0
FBtr0083844	CG31210	-0.0993008	0.996486	0.421717	0.757656	-2.38796	0.124346	0.784393	0.500095	0	0	0	-1	0	0
FBtr0083457	NA	0.187595	0.98971	0.662895	0.29925	0.479369	0.468676	0.783824	0.169028	0	0	0	0	0	0
FBtr0075424	Cpr72Ec	0.724629	0.641187	-2.62558	0.0125857	-0.0735463	0.949304	0.783804	0.272375	0	-1	0	0	0	0
FBtr0074987	CG14095	0.0297468	0.997748	0.323778	0.725773	-0.470336	0.630573	0.783363	0.322001	0	0	0	0	0	0
FBtr0080257	NA	-0.101822	0.995616	-0.0320892	0.975858	0.25098	0.816107	0.782316	0.3084	0	0	0	0	0	0
FBtr0077453	Gs1l	0.403088	0.818319	0.545591	0.371855	0.504647	0.435287	0.781726	0.160195	0	0	0	0	0	0
FBtr0074021	CG9106	0.102821	0.995616	0.467987	0.49502	0.275998	0.732974	0.781606	0.210497	0	0	0	0	0	0
FBtr0085593	RpL32	0.887145	0.5025	0.939874	0.259286	1.7422	0.0783919	0.781227	0.276864	0	0	0	1	0	0
FBtr0086178	CG30160	0.305959	0.950928	-0.246738	0.752624	0.634345	0.420352	0.779762	0.238874	0	0	0	0	0	0
FBtr0081633	CG1988	0.207677	0.995616	0.699464	0.526054	-0.35925	0.793479	0.77937	0.437039	0	0	0	0	0	0
FBtr0086173	Tsp42Ea	-0.111054	0.995616	0.502948	0.43121	0.150435	0.855539	0.778947	0.182929	0	0	0	0	0	0
FBtr0070386	CG3621	0.679373	0.803265	0.775138	0.427818	0.491702	0.656073	0.777898	0.377937	0	0	0	0	0	0
FBtr0074796	skpD	0.0844236	0.995616	0.673337	0.281971	0.266161	0.70348	0.777438	0.164181	0	0	0	0	0	0
FBtr0077817	Nplp4	2.10868	0.3981	1.28011	0.43342	0.299173	0.893155	0.777203	0.621906	0	0	0	0	0	0
FBtr0089386	CG1354	0.181114	0.995616	0.618347	0.445452	0.714719	0.415422	0.777082	0.288913	0	0	0	0	0	0
FBtr0075099	CG32198	1.8012	0.105685	-2.81071	0.0124816	1.00958	0.286833	0.775947	0.307907	1	-1	0	0	0	0
FBtr0071966	CG13538	-0.0870527	0.995616	0.249523	0.699889	0.280349	0.696004	0.7752	0.175806	0	0	0	0	0	0
FBtr0071975	Klp59C	0.258915	0.958691	0.334792	0.609398	-0.321166	0.66116	0.774889	0.189481	0	0	0	0	0	0
FBtr0086902	CG14483	0.471575	0.938694	0.76223	0.453253	0.603638	0.589938	0.77343	0.402636	0	0	0	0	0	0
FBtr0085798	CG1774	0.526532	0.83121	0.212499	0.811621	0.322799	0.735466	0.772887	0.290823	0	0	0	0	0	0
FBtr0077261	NA	0.175303	0.995616	0.187613	0.882432	-0.247775	0.869952	0.772171	0.454202	0	0	0	0	0	0
FBtr0084107	CG3337	-0.0194293	0.998025	0.86939	0.278585	0.417236	0.629034	0.770855	0.269661	0	0	0	0	0	0
FBtr0080253	CG4983	0.146686	0.995616	0.296299	0.821592	-0.96965	0.451038	0.770645	0.479106	0	0	0	0	0	0
FBtr0074185	CG8974	0.191914	0.995616	-0.72952	0.615795	-0.339025	0.855119	0.769142	0.5671	0	0	0	0	0	0
FBtr0078261	NA	0.513164	0.854003	1.05333	0.231798	0.486308	0.595864	0.768573	0.30788	0	0	0	0	0	0
FBtr0071173	CG1387	0.23433	0.985322	0.247324	0.750703	-0.0587557	0.956748	0.768016	0.241827	0	0	0	0	0	0
FBtr0089668	SIP2	-0.0415812	0.998597	0.0315738	0.989946	-2.24138	0.326891	0.767668	0.714529	0	0	0	0	0	0
FBtr0074797	skpC	0.93731	0.561939	1.96503	0.073406	-0.407089	0.70022	0.767221	0.355737	0	1	0	0	0	0
FBtr0087800	CG3884	-0.458611	0.797951	0.732928	0.276748	-0.153752	0.854219	0.766689	0.195254	0	0	0	0	0	0
FBtr0073009	CG32846	-0.364142	0.860207	-1.16776	0.0983161	0.0856807	0.918617	0.766122	0.168423	0	-1	0	0	0	0
FBtr0087581	CG13018	0.24755	0.995616	1.67118	0.1631	0.901872	0.445273	0.76575	0.443106	0	0	0	0	0	0
FBtr0082474	CoVa	0.532859	0.665477	0.0300609	0.968037	0.460702	0.473698	0.765668	0.166308	0	0	0	0	0	0
FBtr0070002	CG9570	-0.287841	0.951631	0.451372	0.512045	0.0195525	0.98606	0.765222	0.222356	0	0	0	0	0	0
FBtr0078699	rev7	-0.0163075	0.998242	-0.161098	0.844876	0.808371	0.32227	0.765119	0.257698	0	0	0	0	0	0
FBtr0088486	hebe	0.281864	0.950378	-0.196475	0.785452	-0.0979599	0.915432	0.763781	0.205051	0	0	0	0	0	0
FBtr0091775	CG33774	-0.140402	0.996486	-1.72762	0.351136	1.12197	0.57195	0.763291	0.669106	0	0	0	0	0	0
FBtr0080339	NA	0.443838	0.882295	0.531415	0.488795	-0.00758454	0.99485	0.762936	0.272528	0	0	0	0	0	0
FBtr0079288	CG11015	0.569187	0.740233	0.348859	0.634673	0.480835	0.540006	0.761753	0.244591	0	0	0	0	0	0
FBtr0073311	NA	0.115037	0.995616	-0.808446	0.335863	1.14046	0.227732	0.761552	0.3047	0	0	0	0	0	0
FBtr0071046	CG1958	-0.152753	0.995616	0.157198	0.850671	0.390588	0.646115	0.761172	0.265943	0	0	0	0	0	0
FBtr0082963	NA	-0.039133	0.996486	0.404387	0.546596	0.660993	0.363067	0.761137	0.208978	0	0	0	0	0	0
FBtr0078577	CG11137	0.340664	0.995616	-0.838546	0.543088	0.60725	0.70172	0.760467	0.552564	0	0	0	0	0	0
FBtr0078655	Os-E	-0.0152903	0.998025	0.42146	0.479681	0.698385	0.29535	0.759997	0.168969	0	0	0	0	0	0
FBtr0078656	Pbprp3	0.289149	0.994356	0.528676	0.591292	1.40678	0.212398	0.759387	0.39139	0	0	0	0	0	0
FBtr0076257	CG14154	0.319902	0.95082	-0.269986	0.739896	-0.39143	0.647972	0.758893	0.268742	0	0	0	0	0	0
FBtr0084383	CG17083	0.393514	0.839682	0.502389	0.417891	-0.390399	0.563647	0.758716	0.181187	0	0	0	0	0	0
FBtr0081352	spir	-0.274515	0.976335	-0.659544	0.40629	0.418425	0.63389	0.758332	0.285525	0	0	0	0	0	0
FBtr0076474	NA	-0.0592486	0.995616	0.118168	0.882131	0.919567	0.255732	0.758048	0.240779	0	0	0	0	0	0
FBtr0084221	CG7059	-0.676939	0.815989	-0.0763475	0.949261	0.0161052	0.991487	0.756855	0.404864	0	0	0	0	0	0
FBtr0074911	Csas	0.471001	0.878846	-0.212614	0.811241	1.06232	0.248187	0.756704	0.30061	0	0	0	0	0	0
FBtr0080795	NA	-0.48671	0.778356	-0.160505	0.824253	-0.308733	0.680339	0.756313	0.205637	0	0	0	0	0	0
FBtr0076286	CG32063	-0.248172	0.995616	0.0870533	0.972756	-2.10653	0.333248	0.756278	0.702693	0	0	0	0	0	0
FBtr0080033	Grip75	-0.128103	0.995616	-0.119068	0.863547	0.415343	0.538269	0.756199	0.183585	0	0	0	0	0	0
FBtr0075545	NA	0.0516626	0.995616	0.319673	0.58499	-0.109189	0.891298	0.755097	0.160642	0	0	0	0	0	0
FBtr0071607	Acox57D-d	0.769329	0.381759	0.727375	0.235355	-0.0567713	0.946532	0.755058	0.161656	0	0	0	0	0	0
FBtr0100058	nimB3	0.606425	0.582293	-0.0109444	0.988403	0.79715	0.248187	0.754941	0.176653	0	0	0	0	0	0
FBtr0081196	CG10750	0.172092	0.989448	0.505678	0.377815	-0.0513857	0.950457	0.753767	0.150688	0	0	0	0	0	0
FBtr0077987	Pino	0.00109171	0.999833	-1.01483	0.240628	0.486142	0.589938	0.753623	0.309013	0	0	0	0	0	0
FBtr0081300	CG10664	0.607278	0.564049	0.0766341	0.912161	0.630679	0.331249	0.753392	0.170244	0	0	0	0	0	0
FBtr0100109	CG34054	-0.692393	0.795568	-1.75111	0.113844	2.82607	0.0270475	0.752697	0.38952	0	-1	0	1	0	0
[truncated: 13,390 more rows]
