# Supplementary material for: A Shared Role for RBF1 and dCAP-D3 in the Regulation of Transcription with Consequences for Innate Immunity
Source: PLoS Genet. 2012 Apr 5;8(4):e1002618. doi: 10.1371/journal.pgen.1002618 (PMC3320600; doi:10.1371/journal.pgen.1002618)
Supplement: Table S2 — Analysis of clustering frequencies among dCAP-D3 and/or RBF1 regulated target genes. A detailed description of the information found in each column is provided to the right of the table. Numbers within individual columns are arbitrary and designate genes present within the same cluster; they do not indicate any information about the strength of their misregulation in mutant flies. (XLS) [file pgen.1002618.s011.xls]

## Sheet: clumpynessSummary
	clump_sig.D3adult...WTadult	clump_sig.RBF1adult...WTadult	clump_sig.intersectAdult	clump_sig.D3larvae...WTlarvae	clump_sig.RBF1larvae...WTlarvae	clump_sig.intersectLarva	clump_cD3	clump_cRBF1	clump_cIntersect					Key:
CG31809	0	-12	0	27	0	0	50	317	0
CG31810	0	-12	0	27	0	0	50	317	0					Column A= Gene name
CG13889	0	0	0	26	0	0	36	60	0					Column B= genes showing significant clustering in dCAP-D3 mutant adults- all numbers are arbitrary, but genes with identical numbers represent genes found in the same cluster, positive numbers are upregulated genes and negative numbers are downregulated genes
Gr61a	0	19	0	26	0	0	36	60	0					Column C= genes showing significant clustering in RBF1 mutant adults- all numbers are arbitrary, but genes with identical numbers represent genes found in the same cluster, positive numbers are upregulated genes and negative numbers are downregulated genes
CG3280	0	0	0	25	34	0	33	53	0					Column D= genes showing significant clustering in dCAP-D3 and RBF1 mutant adults- all numbers are arbitrary, but genes with identical numbers represent genes found in the same cluster
CG14177	0	0	0	25	0	0	33	0	0					Column E= genes showing significant clustering in dCAP-D3 mutant larvae- all numbers are arbitrary, but genes with identical numbers represent genes found in the same cluster, positive numbers are upregulated genes and negative numbers are downregulated genes
CG9624	0	0	0	24	0	0	31	45	0					Column F= genes showing significant clustering in RBF1 mutant larvae- all numbers are arbitrary, but genes with identical numbers represent genes found in the same cluster, positive numbers are upregulated genes and negative numbers are downregulated genes
CG9631	0	0	0	24	0	0	31	0	0					Column G= genes showing significant clustering in dCAP-D3 and RBF1 mutant larvae- all numbers are arbitrary, but genes with identical numbers represent genes found in the same cluster
CG4446	0	0	0	23	0	0	30	0	0					Column H= genes showing significant clustering in dCAP-D3 mutants, regardless of developmental stage or direction of regulation- all numbers are arbitrary, but genes with identical numbers represent genes found in the same cluster
UGP	0	0	0	23	0	0	30	0	0					Column I= genes showing significant clustering in RBF1 mutants, regardless of developmental stage or direction of regulation- all numbers are arbitrary, but genes with identical numbers represent genes found in the same cluster
CG5431	0	0	0	22	0	0	29	0	0					Column J= genes showing significant clustering in dCAP-D3 and RBF1 mutants, regardless of developmental stage or direction of regulation- all numbers are arbitrary, but genes with identical numbers represent genes found in the same cluster
CG5428	0	0	0	22	0	0	29	0	0
LysE	6	0	0	21	29	12	28	43	17
LysB	6	0	0	21	29	12	28	43	17
CG16762	0	0	0	20	0	0	25	33	15
CG33231	0	0	0	20	0	0	25	33	15
Obp57e	0	0	0	19	0	0	24	30	14
CG30148	0	0	0	19	0	0	24	0	0
CG11300	0	0	0	18	17	11	21	25	12
CG13560	0	0	0	18	17	11	21	25	12
CG12491	0	0	0	18	0	0	21	25	0
CG9080	0	0	0	17	13	0	20	20	0
CG13227	0	0	0	17	0	0	20	0	0
CG15661	0	0	0	16	12	10	0	17	11
CG4302	0	0	0	16	12	10	0	17	11
CG32023	0	0	0	15	11	9	18	16	10
CG13311	0	0	0	15	11	9	18	16	10
CG13307	0	0	0	15	11	9	18	0	10
CG32073	0	0	0	14	10	0	17	15	0
CG12522	0	0	0	14	10	0	17	15	0
CG32071	0	0	0	14	0	0	17	0	0
ppk6	0	0	0	13	0	0	16	0	0
CG11048	0	0	0	13	0	0	16	0	0
ppk13	0	0	0	12	9	8	15	14	9
CG33509	0	-1	0	12	9	8	15	0	9
CG14218	8	0	0	11	0	0	13	0	0
CG14204	0	0	0	11	0	0	13	0	0
ng1	0	0	0	10	7	7	11	11	8
CG14265	0	0	0	10	7	7	11	11	8
ng3	0	0	0	10	7	7	11	11	8
ng2	0	0	0	10	7	7	11	11	8
Gr64d	0	0	0	9	6	6	10	9	7
Gr64c	0	0	0	9	6	6	10	9	7
Gr64f	0	3	0	9	6	6	10	9	7
Gr64b	0	0	0	9	6	6	10	9	7
Gr64e	0	3	0	9	6	6	10	9	7
CG13947	0	0	0	8	0	0	9	0	0
CG13946	0	0	0	8	0	0	9	0	0
CG12506	0	0	0	8	0	0	9	0	0
CG18649	0	0	0	7	5	5	8	8	6
CG13461	0	0	0	7	5	5	8	8	6
CG30486	5	0	0	6	4	4	7	7	5
CG30488	5	0	0	6	4	4	7	7	5
CG7631	0	0	0	5	3	3	6	5	4
Or35a	0	0	0	5	3	3	6	5	4
CG18607	4	0	0	4	0	0	5	4	0
CG10476	0	0	0	4	0	0	5	0	0
CG1304	3	2	2	3	2	2	3	2	2
Ser6	3	2	2	3	2	2	3	2	2
epsilonTry	2	1	1	2	1	1	2	1	1
lambdaTry	2	1	1	2	1	1	2	1	1
CG42335	1	0	0	1	0	0	1	0	0
burs	1	0	0	1	0	0	1	0	0
CG3987	9	0	0	0	0	0	46	0	0
CG3984	9	0	0	0	0	0	46	0	0
CG6912	9	0	0	0	0	0	46	0	0
CG14219	8	0	0	0	0	0	13	0	0
CG6733	7	0	0	0	31	0	32	48	18
CG17110	7	0	0	0	0	0	32	48	18
LysC	6	0	0	0	0	0	28	0	0
LysD	6	0	0	0	0	0	28	0	0
CG18606	4	0	0	0	0	0	5	4	0
CG12865	0	0	0	0	-106	0	68	142	27
Tim17a2	0	0	0	0	-105	0	67	445	26
CG1113	0	0	0	0	-105	0	67	445	26
CG9989	0	0	0	0	-91	0	63	429	0
CG33346	0	0	0	0	-91	0	63	429	0
Gr32a	0	0	0	0	0	0	52	0	0
CG6201	0	0	0	0	0	0	52	0	0
CG9339	0	0	0	0	0	0	51	322	0
CG14401	0	0	0	0	0	0	51	0	0
CG11454	0	0	0	0	0	0	47	0	0
CG31976	0	0	0	0	0	0	47	184	0
CG2064	0	0	0	0	0	0	45	0	0
CG2065	0	0	0	0	0	0	45	0	0
CG14085	0	0	0	0	0	0	44	0	21
CG11878	0	0	0	0	0	0	43	0	0
CG13656	0	0	0	0	0	0	43	287	0
CG17108	0	0	0	0	0	0	42	277	0
Lip1	0	0	0	0	0	0	42	0	0
CG7300	0	0	0	0	0	0	42	0	0
CG7294	0	0	0	0	0	0	42	277	0
CG13607	0	0	0	0	0	0	38	0	0
CG18428	0	0	0	0	0	0	38	0	0
CG11253	0	0	0	0	0	0	37	68	19
CG11255	0	0	0	0	0	0	37	68	19
CG4866	0	0	0	0	0	0	35	0	0
CG4847	0	0	0	0	0	0	35	0	0
CG3062	0	0	0	0	0	0	34	0	0
pon	0	0	0	0	0	0	34	0	0
CG8066	0	0	0	0	0	0	27	42	16
CG14247	0	0	0	0	25	0	26	37	0
CG6403	0	0	0	0	25	0	26	37	0
CG13427	0	0	0	0	0	0	24	30	14
GstE10	0	0	0	0	0	0	23	28	0
CG15065	0	0	0	0	0	0	23	0	0
Ugt35b	0	-2	0	0	19	0	22	0	13
CG4757	0	-2	0	0	0	0	22	99	13
CG17217	0	0	0	0	0	0	19	0	0
CG31860	0	0	0	0	0	0	19	0	0
Ag5r	0	0	0	0	0	0	14	0	0
CG5334	0	0	0	0	0	0	14	0	0
CG9040	0	0	0	0	0	0	12	0	0
CG17364	0	0	0	0	0	0	12	0	0
CG15254	0	0	0	0	3	0	6	5	0
rib	0	0	0	0	0	0	5	0	0
CG3819	0	0	0	0	0	0	4	3	3
CG6839	0	0	0	0	0	0	4	3	3
betaTry	0	0	0	0	1	0	0	1	0
CG6296	0	0	0	0	0	0	0	0	0
Cyp4p2	0	0	0	0	0	0	0	0	0
CG7912	0	0	0	0	0	0	0	0	0
CG7054	0	0	0	0	0	0	0	0	0
CG5506	0	0	0	0	0	0	0	0	0
CG7920	0	0	0	0	0	0	0	0	0
CG42825	0	0	0	0	0	0	0	0	0
CG6673	0	0	0	0	0	0	0	0	0
CG9918	0	0	0	0	0	0	0	0	0
Acp62F	0	0	0	0	0	0	0	0	0
CG3568	0	0	0	0	0	0	0	0	0
CG1702	0	0	0	0	0	0	0	0	0
obp57d	0	0	0	0	0	0	0	0	0
cg12560	0	0	0	0	0	0	0	0	0
Ssl2	0	0	0	0	0	0	0	0	0
Btd	0	0	0	0	0	0	0	0	0
CG12895	0	0	0	0	0	0	0	6	0
CG3635	0	0	0	0	0	0	0	0	0
CG31380	0	0	0	0	0	0	0	0	0
CG11475	0	0	0	0	0	0	0	0	0
CG7650	0	0	0	0	0	0	0	0	0
w	0	0	0	0	0	0	0	0	0
CG3868	0	0	0	0	0	0	0	0	0
CG13897	0	0	0	0	0	0	0	0	0
lcs	0	0	0	0	0	0	0	0	0
CG3292	0	0	0	0	0	0	0	0	0
Cyp313a5	0	0	0	0	0	0	0	0	0
Gr64a	0	0	0	0	0	0	0	9	0
CG5892	0	0	0	0	0	0	0	0	0
CG15741	0	0	0	0	0	0	0	10	0
CG15615	0	0	0	0	0	0	0	12	0
MtnB	0	0	0	0	0	0	0	0	0
CG13324	0	0	0	0	8	0	0	13	0
CG15255	0	0	0	0	0	0	0	0	0
Cyp6a2	0	0	0	0	0	0	0	0	0
CG10918	0	0	0	0	0	0	0	0	0
CG4716	0	0	0	0	0	0	0	0	0
CG33093	0	0	0	0	0	0	0	0	0
Hsp70Ab	0	0	0	0	0	0	0	0	0
CG17018	0	0	0	0	0	0	0	0	0
CG8562	0	0	0	0	0	0	0	0	0
CG4377	0	0	0	0	0	0	0	0	0
Cpr67Fa2	0	0	0	0	0	0	0	0	0
CG17134	0	0	0	0	0	0	0	0	0
CG16775	0	0	0	0	0	0	0	0	0
CG32284	0	0	0	0	0	0	0	18	0
Iris	0	0	0	0	0	0	0	0	0
CG3301	0	0	0	0	0	0	0	19	0
CG6475	0	0	0	0	0	0	0	0	0
CG31955	0	0	0	0	14	0	0	21	0
CG34043	0	0	0	0	0	0	0	22	0
CG13506	0	0	0	0	0	0	0	0	0
CG7203	0	0	0	0	15	0	0	23	0
CG13721	0	0	0	0	0	0	0	0	0
CG8791	0	0	0	0	0	0	0	0	0
CG4842	0	0	0	0	0	0	0	0	0
CG5011	0	0	0	0	16	0	0	24	0
CG7458	0	0	0	0	0	0	0	0	0
CG34005	0	0	0	0	18	0	0	26	0
CG7560	0	0	0	0	0	0	0	0	0
Damm	0	0	0	0	0	0	0	0	0
CG14495	0	4	0	0	18	0	0	26	0
CG9757	0	0	0	0	0	0	0	0	0
CG5070	0	0	0	0	0	0	0	0	0
CG5160	0	0	0	0	0	0	0	0	0
Cyp4p3	0	0	0	0	0	0	0	0	0
CG17235	0	0	0	0	0	0	0	0	0
Cpr5C	0	0	0	0	0	0	0	0	0
CG12963	0	0	0	0	0	0	0	0	0
CG11893	0	0	0	0	20	0	0	27	0
Jhedup	0	0	0	0	0	0	0	0	0
rec	0	0	0	0	0	0	0	0	0
Mes4	0	0	0	0	0	0	0	29	0
CG9928	0	0	0	0	0	0	0	0	0
CG6865	0	0	0	0	0	0	0	0	0
CG13325	0	0	0	0	0	0	0	0	0
CG10332	0	0	0	0	0	0	0	0	0
sala	0	0	0	0	0	0	0	0	0
CG5402	0	0	0	0	0	0	0	0	0
CG15347	0	0	0	0	0	0	0	0	0
Jon66Cii	0	0	0	0	0	0	0	0	0
CG4367	0	0	0	0	0	0	0	0	0
SmG	0	0	0	0	0	0	0	0	0
CG31464	0	0	0	0	21	0	0	31	0
CG18586	0	0	0	0	22	0	0	32	0
CG1358	0	0	0	0	0	0	0	0	0
CG15043	0	0	0	0	0	0	0	0	0
CG6327	0	0	0	0	0	0	0	0	0
phr	0	0	0	0	0	0	0	0	0
CG32318	0	0	0	0	0	0	0	34	0
CG11697	0	0	0	0	0	0	0	0	0
CG13912	0	0	0	0	0	0	0	0	0
RpL37b	0	0	0	0	0	0	0	0	0
png	0	0	0	0	23	0	0	35	0
Obp56c	0	0	0	0	24	0	0	36	0
glob1	0	0	0	0	0	0	0	0	0
CG3321	0	0	0	0	0	0	0	0	0
CG13822	0	0	0	0	0	0	0	0	0
CG14356	0	0	0	0	0	0	0	0	0
CG18404	0	0	0	0	0	0	0	0	0
gdl-ORF39	0	0	0	0	0	0	0	38	0
Oatp58Db	0	0	0	0	26	0	0	39	0
CG4627	0	0	0	0	27	0	0	40	0
CG10039	0	0	0	0	28	0	0	41	0
CG13806	0	0	0	0	0	0	0	0	0
CG5491	0	0	0	0	0	0	0	0	0
Cp18	0	0	0	0	0	0	0	0	0
DJ-1alpha	0	0	0	0	0	0	0	0	0
CG8960	0	0	0	0	0	0	0	0	0
Npc2c	0	0	0	0	0	0	0	0	0
CG12027	0	0	0	0	0	0	0	0	0
CG11158	0	0	0	0	30	0	0	44	0
CG14903	0	0	0	0	0	0	0	0	0
Obp47a	0	0	0	0	0	0	0	0	0
CG2652	0	0	0	0	0	0	0	0	0
CG4335	0	0	0	0	0	0	0	0	0
CG33170	0	0	0	0	0	0	0	0	0
Obp46a	0	0	0	0	0	0	0	0	0
CG32237	0	0	0	0	0	0	0	0	0
CG14823	0	0	0	0	0	0	0	46	0
CG11722	0	0	0	0	0	0	0	0	0
CG30413	0	0	0	0	0	0	0	0	0
mre11	0	0	0	0	0	0	0	0	0
CG6985	0	0	0	0	0	0	0	0	0
CG32262	0	0	0	0	0	0	0	47	0
mRpL20	0	0	0	0	0	0	0	0	0
CG33985	0	0	0	0	32	0	0	0	0
CG2187	0	0	0	0	33	0	0	49	0
CG9616	0	0	0	0	0	0	0	0	0
pcl	0	0	0	0	0	0	0	0	0
CG10472	0	0	0	0	0	0	0	50	0
kraken	0	0	0	0	0	0	0	51	0
CG8607	0	0	0	0	0	0	0	0	0
ana2	0	0	0	0	0	0	0	0	0
nemy	0	0	0	0	0	0	0	0	0
Arpc3B	0	0	0	0	0	0	0	0	0
CG18446	0	0	0	0	0	0	0	52	0
l(2)06496	0	0	0	0	0	0	0	54	0
CG9921	0	0	0	0	0	0	0	0	0
Psf1	0	0	0	0	0	0	0	0	0
CG13833	0	0	0	0	0	0	0	0	0
CG17147	0	0	0	0	35	0	0	55	0
bwa	0	0	0	0	0	0	0	0	0
CG7191	0	0	0	0	0	0	0	0	0
obst-F	0	0	0	0	0	0	0	0	0
rumi	0	0	0	0	0	0	0	0	0
CG30093	0	0	0	0	0	0	0	0	0
CG6443	0	0	0	0	0	0	0	56	0
Pdf	0	0	0	0	0	0	0	0	0
CG3759	0	0	0	0	0	0	0	0	0
Rab9	0	0	0	0	0	0	0	57	0
CG14237	0	0	0	0	0	0	0	0	0
CG15771	0	0	0	0	36	0	0	58	0
Hmgcr	0	0	0	0	0	0	0	0	0
CG14369	0	0	0	0	37	0	0	59	0
cni	0	0	0	0	0	0	0	0	0
CG15646	0	0	0	0	0	0	0	0	0
CG13692	0	0	0	0	38	0	0	61	0
Cyp6t1	0	0	0	0	0	0	0	0	0
CG31758	0	0	0	0	0	0	0	0	0
rtet	0	0	0	0	0	0	0	0	0
CG32582	0	0	0	0	0	0	0	0	0
CG3902	0	0	0	0	0	0	0	62	0
CG10970	0	0	0	0	0	0	0	0	0
egr	0	0	0	0	0	0	0	0	0
CG15459	0	0	0	0	0	0	0	0	0
CG6891	0	0	0	0	0	0	0	0	0
Aats-his	0	0	0	0	39	0	0	63	0
CG7056	0	0	0	0	0	0	0	0	0
CG3570	0	0	0	0	40	0	0	64	0
CG15579	0	0	0	0	0	0	0	0	0
CG3774	0	0	0	0	0	0	0	0	0
CG30492	0	0	0	0	0	0	0	0	0
ETHR	0	0	0	0	0	0	0	0	0
RpL7-like	0	0	0	0	0	0	0	0	0
CG32564	0	0	0	0	0	0	0	0	0
CG5550	0	0	0	0	0	0	0	0	0
CG32408	0	0	0	0	0	0	0	0	0
CG14872	0	0	0	0	0	0	0	0	0
Elp2	0	0	0	0	0	0	0	0	0
CG12934	0	0	0	0	0	0	0	0	0
CG13694	0	0	0	0	0	0	0	0	0
Odc2	0	0	0	0	41	0	0	65	0
CG13512	0	5	0	0	42	0	0	66	0
GM130	0	0	0	0	0	0	0	67	0
CG4563	0	0	0	0	0	0	0	0	0
CG18131	0	0	0	0	0	0	0	0	0
CG32667	0	0	0	0	0	0	0	0	0
cg6490	0	0	0	0	0	0	0	0	0
CG12990	0	0	0	0	0	0	0	0	0
CG13335	0	0	0	0	0	0	0	0	0
CG17124	0	0	0	0	0	0	0	0	0
CG13813	0	0	0	0	0	0	0	55	0
CG15142	0	0	0	0	0	0	0	0	0
Vago	0	0	0	0	0	0	0	0	0
cg11538	0	0	0	0	0	0	0	0	0
CG13032	0	0	0	0	0	0	0	0	0
CG5379	0	0	0	0	0	0	0	0	0
CG5644	0	0	0	0	0	0	0	0	0
CG10730	0	0	0	0	0	0	0	0	0
CG2812	0	0	0	0	0	0	0	0	0
CG14881	0	6	0	0	0	0	0	69	0
CG17032	0	0	0	0	0	0	0	70	0
CG10654	0	0	0	0	0	0	0	0	0
Lsd-1	0	0	0	0	0	0	0	0	0
fit	0	7	0	0	0	0	0	71	0
nimC1	0	0	0	0	0	0	0	0	0
CG14187	0	0	0	0	0	0	0	72	0
CG3857	0	0	0	0	0	0	0	0	0
CG7433	0	0	0	0	0	0	0	0	0
CG14990	0	0	0	0	0	0	0	0	0
Lsp2	0	0	0	0	0	0	0	0	0
CG10013	0	0	0	0	0	0	0	0	0
CG9377	0	0	0	0	0	0	0	0	0
CG30431	0	0	0	0	0	0	0	73	0
cg5999	0	0	0	0	0	0	0	0	0
CG10361	0	0	0	0	0	0	0	0	0
CG32165	0	0	0	0	0	0	0	0	0
nAcRbeta-21C	0	0	0	0	0	0	0	0	0
CG13998	0	0	0	0	0	0	0	0	0
CG8193	0	0	0	0	0	0	0	0	0
CG15800	0	0	0	0	0	0	0	0	0
Cpr47Eg	0	0	0	0	0	0	0	0	0
CG7213	0	0	0	0	0	0	0	0	0
PGRP-SC1b	0	0	0	0	43	0	0	74	0
Cyp28d2	0	0	0	0	0	0	0	0	0
DptB	0	0	0	0	44	0	0	75	0
CG33268	0	0	0	0	45	0	0	76	0
CG15253	0	0	0	0	3	0	0	5	0
PGRP-SC1a	0	0	0	0	43	0	0	74	0
Ste:CG33246	0	0	0	0	0	0	0	0	0
Ste:CG33236	0	0	0	0	46	0	0	77	0
CG30265	0	0	0	0	47	0	0	78	0
CG33247	0	0	0	0	0	0	0	0	0
Ste:CG33237	0	0	0	0	46	0	0	77	0
Ste12DOR	0	0	0	0	0	0	0	0	0
Toll-4	0	0	0	0	48	0	0	79	0
CG7377	0	0	0	0	45	0	0	76	0
CG32751	0	0	0	0	0	0	0	0	0
CG12607	0	0	0	0	0	0	0	0	0
Cpr49Ad	0	0	0	0	0	0	0	0	0
CheB38a	0	8	0	0	49	0	0	80	0
CG8534	0	0	0	0	0	0	0	0	0
CG9360	0	0	0	0	0	0	0	81	0
CG6289	0	0	0	0	0	0	0	0	0
CecC	0	0	0	0	50	0	0	82	0
Mst84Db	0	0	0	0	51	0	0	83	0
CG18609	0	0	0	0	0	0	0	0	0
CG7214	0	-3	0	0	15	0	0	0	0
prc	0	0	0	0	0	0	0	0	0
Hsp70Bc	0	0	0	0	0	0	0	0	0
CG10659	0	0	0	0	0	0	0	0	0
Hsp70Ba	0	0	0	0	0	0	0	0	0
CG8708	0	0	0	0	0	0	0	0	0
CG9555	0	0	0	0	0	0	0	0	0
Cyp6t3	0	0	0	0	0	0	0	84	0
CG8654	0	0	0	0	0	0	0	0	0
CG4753	0	0	0	0	52	0	0	85	0
CG11350	0	0	0	0	53	0	0	86	0
CG10630	0	0	0	0	0	0	0	0	0
Acp1	0	-3	0	0	15	0	0	0	0
CG30430	0	0	0	0	0	0	0	0	0
CG33267	0	0	0	0	54	0	0	87	0
CG32364	0	0	0	0	0	0	0	0	0
CG33999	0	0	0	0	0	0	0	88	0
cid	0	0	0	0	0	0	0	0	0
CG31477	0	0	0	0	55	0	0	89	0
Mst84Dc	0	0	0	0	51	0	0	83	0
WRNexo	0	0	0	0	0	0	0	0	0
CG13936	0	0	0	0	0	0	0	0	0
CG7557	0	0	0	0	0	0	0	0	0
Mst84Da	0	0	0	0	51	0	0	83	0
CG14545	0	0	0	0	0	0	0	0	0
CG15219	0	0	0	0	0	0	0	0	0
Hsp70Bbb	0	0	0	0	0	0	0	0	0
eIF4E-3	0	0	0	0	0	0	0	0	0
Mst84Dd	0	0	0	0	51	0	0	83	0
CG10959	0	0	0	0	56	0	0	90	0
CG31820	0	0	0	0	0	0	0	0	0
CG17107	0	0	0	0	0	0	0	91	0
Ts	0	0	0	0	0	0	0	0	0
CG11368	0	0	0	0	0	0	0	0	0
MtnC	0	0	0	0	0	0	0	0	0
CG8799	0	0	0	0	0	0	0	0	0
DNApol-alpha50	0	0	0	0	57	0	0	92	0
CG8834	0	0	0	0	0	0	0	0	0
to	0	0	0	0	0	0	0	0	0
CG31468	0	0	0	0	0	0	0	0	0
CG18327	0	0	0	0	58	0	0	93	0
RecQ4	0	0	0	0	0	0	0	0	0
CG15057	0	0	0	0	0	0	0	94	0
Lcp65Ag3	0	0	0	0	0	0	0	0	0
CG30457	0	0	0	0	0	0	0	0	0
CG13705	0	0	0	0	0	0	0	0	0
CG12490	0	0	0	0	47	0	0	78	0
ocn	0	0	0	0	0	0	0	0	0
CG7208	0	0	0	0	0	0	0	0	0
CG13170	0	0	0	0	0	0	0	0	0
LvpL	0	0	0	0	59	0	0	95	0
CG15597	0	0	0	0	0	0	0	0	0
CG30085	0	0	0	0	0	0	0	0	0
Victoria	0	0	0	0	0	0	0	0	0
Gpo-1	0	0	0	0	0	0	0	0	0
CG12766	0	0	0	0	0	0	0	0	0
CG17470	0	0	0	0	0	0	0	0	0
CG7046	0	0	0	0	60	0	0	96	0
BthD	0	0	0	0	0	0	0	0	0
yellow-f2	0	0	0	0	0	0	0	97	0
CG3106	0	0	0	0	0	0	0	0	0
Ugt86Dg	0	0	0	0	19	0	0	99	0
CG6048	0	0	0	0	0	0	0	0	0
CG14419	0	0	0	0	0	0	0	100	0
CG17119	0	0	0	0	0	0	0	101	0
dnk	0	0	0	0	0	0	0	0	0
CG31454	0	0	0	0	0	0	0	102	0
Lsm10	0	0	0	0	0	0	0	0	0
Orc1	0	0	0	0	0	0	0	0	0
CG13102	0	0	0	0	62	0	0	103	0
CG13690	0	0	0	0	38	0	0	61	0
Ugt86Dd	0	0	0	0	0	0	0	0	0
CG15127	0	0	0	0	0	0	0	0	0
Fmo-2	0	0	0	0	0	0	0	0	0
CG8128	0	0	0	0	0	0	0	0	0
CG17567	0	0	0	0	0	0	0	104	0
CG32407	0	0	0	0	0	0	0	0	0
janB	0	0	0	0	0	0	0	0	0
CG31781	0	0	0	0	0	0	0	105	0
shu	0	0	0	0	0	0	0	0	0
CG13748	0	0	0	0	63	0	0	106	0
RnrS	0	0	0	0	0	0	0	0	0
Pole2	0	0	0	0	0	0	0	0	0
TwdlL	0	0	0	0	0	0	0	0	0
msd1	0	0	0	0	0	0	0	0	0
CG10336	0	0	0	0	0	0	0	0	0
CG5568	0	0	0	0	22	0	0	32	0
CG18765	0	0	0	0	0	0	0	107	0
CG31265	0	0	0	0	0	0	0	0	0
CG13135	0	0	0	0	0	0	0	108	0
CG15200	0	0	0	0	0	0	0	0	0
CG8517	0	0	0	0	0	0	0	0	0
CG15336	0	0	0	0	56	0	0	90	0
CG18662	0	0	0	0	0	0	0	0	0
Orc6	0	0	0	0	0	0	0	0	0
sug	0	0	0	0	0	0	0	0	0
IM3	0	0	0	0	0	0	0	0	0
CG7730	0	0	0	0	0	0	0	0	0
Cyp4e3	0	0	0	0	0	0	0	0	0
CG5194	0	0	0	0	0	0	0	109	0
CG1441	0	0	0	0	65	0	0	110	0
CG4375	0	0	0	0	0	0	0	0	0
CG15456	0	9	0	0	0	0	0	111	0
cutlet	0	0	0	0	14	0	0	21	0
CG15213	0	0	0	0	0	0	0	0	0
sut2	0	0	0	0	0	0	0	0	0
Cpr47Eb	0	0	0	0	0	0	0	0	0
hd	0	0	0	0	0	0	0	0	0
CG13230	0	0	0	0	0	0	0	0	0
CG12439	0	0	0	0	48	0	0	79	0
CG9576	0	0	0	0	0	0	0	112	0
CG13422	0	0	0	0	0	0	0	0	0
CG30192	0	0	0	0	66	0	0	113	0
CG14820	0	0	0	0	0	0	0	0	0
CG31788	0	0	0	0	0	0	0	0	0
CG12617	0	0	0	0	0	0	0	0	0
DNApol-alpha60	0	0	0	0	0	0	0	0	0
CG14958	0	0	0	0	0	0	0	114	0
Mcm3	0	0	0	0	0	0	0	0	0
Nplp2	0	0	0	0	0	0	0	0	0
Sld5	0	0	0	0	0	0	0	0	0
Mst35Bb	0	0	0	0	0	0	0	0	0
spn-E	0	0	0	0	0	0	0	0	0
CG9284	0	0	0	0	0	0	0	115	0
CG14205	0	0	0	0	0	0	0	0	0
CG14022	0	0	0	0	0	0	0	0	0
CG13350	0	0	0	0	0	0	0	116	0
CG9752	0	0	0	0	67	0	0	117	0
CG10553	0	0	0	0	68	0	0	118	0
CG14926	0	0	0	0	0	0	0	0	0
CG12853	0	0	0	0	0	0	0	0	0
CG15497	0	0	0	0	0	0	0	0	0
CG7720	0	0	0	0	0	0	0	0	0
Cpr65Ax2	0	0	0	0	0	0	0	0	0
CG15199	0	0	0	0	0	0	0	0	0
CG11322	0	0	0	0	0	0	0	0	0
CG9780	0	0	0	0	0	0	0	0	0
CG31041	0	0	0	0	69	0	0	119	0
CG18193	0	0	0	0	70	0	0	120	0
CG7910	0	0	0	0	0	0	0	0	0
CG14529	0	0	0	0	0	0	0	0	0
CG6503	0	0	0	0	0	0	0	0	0
CG17376	0	0	0	0	0	0	0	0	0
CG33127	0	0	0	0	0	0	0	0	0
dj	0	0	0	0	0	0	0	121	0
AQP	0	0	0	0	27	0	0	40	0
CG32588	0	0	0	0	0	0	0	0	0
CG7045	0	0	0	0	60	0	0	96	0
CG5928	0	0	0	0	0	0	0	0	0
CG7365	0	0	0	0	0	0	0	0	0
CG15220	0	0	0	0	0	0	0	0	0
CG10911	0	0	0	0	18	0	0	26	0
CG3119	0	0	0	0	0	0	0	0	0
CG4562	0	0	0	0	71	0	0	122	0
Mst87F	0	0	0	0	0	0	0	0	0
CDC45L	0	0	0	0	0	0	0	0	0
Toll-9	0	0	0	0	72	0	0	123	0
CG15631	0	0	0	0	0	0	0	0	0
Nnf1b	0	0	0	0	0	0	0	0	0
CG12355	0	0	0	0	0	0	0	0	0
CG14676	0	0	0	0	73	0	0	124	0
CG30272	0	0	0	0	47	0	0	78	0
CG7593	0	0	0	0	0	0	0	125	0
CG11164	0	0	0	0	0	0	0	0	0
CG3604	0	0	0	0	14	0	0	21	0
Rtnl2	0	0	0	0	0	0	0	0	0
CG14508	0	0	0	0	0	0	0	0	0
CG5804	0	0	0	0	0	0	0	0	0
CG9396	0	0	0	0	0	0	0	126	0
CG30369	0	0	0	0	0	0	0	0	0
CG30008	0	0	0	0	65	0	0	110	0
CG14605	0	0	0	0	0	0	0	0	0
vanin-like	0	0	0	0	0	0	0	0	0
CG3239	0	0	0	0	0	0	0	0	0
Pdp1	0	0	0	0	0	0	0	0	0
spheroide	0	0	0	0	0	0	0	0	0
CG31639	0	0	0	0	0	0	0	0	0
mus209	0	0	0	0	0	0	0	0	0
c-cup	0	0	0	0	0	0	0	0	0
DNApol-alpha73	0	0	0	0	0	0	0	0	0
CG14057	0	0	0	0	0	0	0	0	0
CG3706	0	0	0	0	0	0	0	127	0
mus301	0	0	0	0	0	0	0	0	0
eloF	0	0	0	0	0	0	0	0	0
CG17571	0	0	0	0	0	0	0	0	0
v(2)k05816	0	0	0	0	74	0	0	128	0
CG13747	0	0	0	0	0	0	0	0	0
CG6462	0	0	0	0	0	0	0	0	0
CG1213	0	0	0	0	73	0	0	124	0
CG7881	0	0	0	0	0	0	0	0	0
CG14537	0	0	0	0	0	0	0	0	0
CG12177	0	0	0	0	30	0	0	44	0
CG32726	0	0	0	0	0	0	0	0	0
CG32625	0	0	0	0	0	0	0	0	0
CG13077	0	0	0	0	0	0	0	0	0
Orc2	0	0	0	0	0	0	0	0	0
CG14072	0	0	0	0	0	0	0	0	0
CG32251	0	0	0	0	0	0	0	0	0
CG30049	0	-5	0	0	0	0	0	0	0
sowi	0	0	0	0	0	0	0	0	0
CG2120	0	0	0	0	0	0	0	0	0
CG13711	0	0	0	0	0	0	0	0	0
CG2871	0	0	0	0	0	0	0	0	0
CG4653	0	0	0	0	0	0	0	129	0
CG13228	0	0	0	0	13	0	0	20	0
Cpr47Ec	0	0	0	0	0	0	0	0	0
CG3306	0	0	0	0	34	0	0	0	0
CG30043	0	0	0	0	0	0	0	130	0
CG31898	0	0	0	0	75	0	0	131	0
CG14803	0	0	0	0	0	0	0	0	0
CG15423	0	0	0	0	28	0	0	41	0
CG32267	0	0	0	0	0	0	0	0	0
CG13323	0	0	0	0	8	0	0	13	0
CG13898	0	0	0	0	0	0	0	0	0
CG33274	0	10	0	0	76	0	0	132	0
CG13394	0	0	0	0	77	0	0	133	0
Pbprp5	0	0	0	0	0	0	0	0	0
Obp56b	0	0	0	0	24	0	0	36	0
His4r	0	0	0	0	0	0	0	0	0
alpha-Est8	0	0	0	0	0	0	0	0	0
CG30196	0	0	0	0	42	0	0	66	0
And	0	0	0	0	78	0	0	134	0
asf1	0	0	0	0	0	0	0	0	0
Eaat1	0	0	0	0	79	0	0	0	0
CG5278	0	0	0	0	0	0	0	0	0
eIF4E-4	0	0	0	0	0	0	0	0	0
CG10000	0	0	0	0	0	0	0	0	0
CG8476	0	0	0	0	0	0	0	0	0
kappaTry	0	0	0	0	1	0	0	1	0
CG15198	0	0	0	0	0	0	0	0	0
CG17475	0	0	0	0	0	0	0	0	0
CG8620	0	0	0	0	0	0	0	0	0
CG32832	0	0	0	0	0	0	0	0	0
CG14579	0	0	0	0	0	0	0	0	0
CG8629	0	0	0	0	0	0	0	135	0
CG30039	0	0	0	0	0	0	0	0	0
CG9766	0	0	0	0	0	0	0	0	0
DNApolalpha180	0	0	0	0	0	0	0	0	0
CG2681	0	0	0	0	80	0	0	136	0
Oatp58Dc	0	0	0	0	26	0	0	39	0
CG14482	0	0	0	0	0	0	0	0	0
CG8630	0	0	0	0	0	0	0	0	0
CG32696	0	0	0	0	0	0	0	0	0
CG31013	0	0	0	0	0	0	0	0	0
CG2990	0	0	0	0	81	0	0	137	0
CG30502	0	0	0	0	0	0	0	138	0
Npc2h	0	0	0	0	0	0	0	0	0
robl62A	0	0	0	0	0	0	0	139	0
CG33252	0	0	0	0	0	0	0	0	0
CG13741	0	0	0	0	0	0	0	0	0
CG31226	0	0	0	0	0	0	0	0	0
CG9904	0	0	0	0	0	0	0	140	0
CG31141	0	0	0	0	0	0	0	0	0
CG9399	0	0	0	0	0	0	0	126	0
CG1690	0	0	0	0	0	0	0	141	0
CG31025	0	0	0	0	0	0	0	0	0
CG12859	0	0	0	0	0	0	0	142	0
CG14292	0	0	0	0	82	0	0	143	0
Su(z)12	0	0	0	0	0	0	0	0	0
CG4115	0	0	0	0	0	0	0	0	0
CG7025	0	0	0	0	0	0	0	0	0
lat	0	0	0	0	27	0	0	40	0
CG31005	0	0	0	0	0	0	0	0	0
Nxt1	0	0	0	0	83	0	0	144	0
CG30026	0	0	0	0	0	0	0	0	0
CG15539	0	0	0	0	84	0	0	0	0
CG32061	0	0	0	0	0	0	0	0	0
CG11788	0	0	0	0	0	0	0	145	0
CG9875	0	0	0	0	0	0	0	0	0
CG31086	0	0	0	0	0	0	0	0	0
kek2	0	0	0	0	0	0	0	0	0
Tsp42En	0	0	0	0	0	0	0	0	0
mms4	0	0	0	0	0	0	0	0	0
Dbi	0	0	0	0	0	0	0	135	0
CG13460	0	0	0	0	0	0	0	0	0
Gr98a	0	0	0	0	0	0	0	0	0
CG9016	0	0	0	0	0	0	0	0	0
CG13541	0	0	0	0	0	0	0	0	0
CG9447	0	0	0	0	0	0	0	0	0
CG32487	0	0	0	0	0	0	0	0	0
CG14694	0	0	0	0	0	0	0	0	0
CG18806	0	0	0	0	85	0	0	146	0
Ppm1	0	0	0	0	0	0	0	0	0
Ect4	0	0	0	0	0	0	0	0	0
DNApol-epsilon	0	0	0	0	0	0	0	0	0
CG13059	0	0	0	0	0	0	0	0	0
CG18173	0	0	0	0	0	0	0	0	0
CG14757	0	0	0	0	86	0	0	147	0
CG4835	0	0	0	0	0	0	0	0	0
CG17300	0	0	0	0	0	0	0	0	0
CG14297	0	0	0	0	82	0	0	143	0
CG6084	0	0	0	0	0	0	0	0	0
Atg8b	0	0	0	0	0	0	0	0	0
CG18814	0	0	0	0	52	0	0	85	0
CG14113	0	0	0	0	0	0	0	0	0
CG10560	0	0	0	0	68	0	0	118	0
CG17991	0	0	0	0	0	0	0	0	0
Mst77F	0	0	0	0	0	0	0	148	0
CG12816	0	0	0	0	0	0	0	0	0
CG17261	0	0	0	0	74	0	0	128	0
CG6470	0	0	0	0	39	0	0	63	0
CG11106	0	0	0	0	0	0	0	0	0
CG5386	0	0	0	0	87	0	0	149	0
CG5757	0	0	0	0	0	0	0	150	0
CG3740	0	0	0	0	0	0	0	151	0
Or30a	0	0	0	0	0	0	0	0	0
Gpdh	0	0	0	0	0	0	0	0	0
CG16995	0	0	0	0	88	0	0	152	0
CG30016	0	0	0	0	0	0	0	0	0
CG6971	0	0	0	0	0	0	0	0	0
CG14343	0	0	0	0	0	0	0	0	0
CG7202	0	0	0	0	0	0	0	153	0
CG14645	0	0	0	0	0	0	0	0	0
CG13359	0	0	0	0	0	0	0	154	0
t-cup	0	0	0	0	0	0	0	0	0
Fen1	0	0	0	0	0	0	0	155	0
CG18506	0	0	0	0	0	0	0	0	0
dUTPase	0	0	0	0	0	0	0	0	0
CG9877	0	0	0	0	0	0	0	0	0
CG13978	0	0	0	0	0	0	0	0	0
CG32643	0	0	0	0	0	0	0	0	0
CG6463	0	0	0	0	0	0	0	0	0
CG31007	0	0	0	0	0	0	0	0	0
Mlh1	0	0	0	0	86	0	0	147	0
CG32485	0	0	0	0	0	0	0	0	0
CG9772	0	0	0	0	0	0	0	0	0
Ugt37c1	0	0	0	0	0	0	0	0	0
Cpr49Ae	0	0	0	0	0	0	0	0	0
Nha2	0	0	0	0	0	0	0	0	0
CG13284	0	0	0	0	89	0	0	156	0
CG13030	0	0	0	0	0	0	0	0	0
CG30187	0	0	0	0	0	0	0	0	0
Obp58c	0	0	0	0	90	0	0	157	0
Sdic3	0	0	0	0	0	0	0	0	0
CG9459	0	0	0	0	91	0	0	158	0
lin-52	0	0	0	0	36	0	0	58	0
CG7299	0	0	0	0	0	0	0	91	0
CG8508	0	0	0	0	0	0	0	0	0
Mcm5	0	0	0	0	0	0	0	159	0
CG15887	0	0	0	0	0	0	0	0	0
Cyp309a2	0	0	0	0	0	0	0	0	0
CG4701	0	0	0	0	92	0	0	160	0
Mcm2	0	0	0	0	93	0	0	161	0
CG6055	0	0	0	0	0	0	0	0	0
CR31032	0	0	0	0	0	0	0	0	0
CG7211	0	0	0	0	15	0	0	23	0
RpL10Aa	0	0	0	0	0	0	0	0	0
CG17819	0	0	0	0	0	0	0	71	0
HDC02577	0	0	0	0	0	0	0	0	0
CG10396	0	0	0	0	0	0	0	0	0
CG16904	0	0	0	0	91	0	0	158	0
CG31644	0	0	0	0	0	0	0	0	0
CG31093	0	0	0	0	0	0	0	0	0
Mcm10	0	0	0	0	0	0	0	0	0
CG9014	0	0	0	0	0	0	0	0	0
Tsp33B	0	0	0	0	94	0	0	162	0
CG4593	0	11	0	0	95	0	0	163	0
CG11362	0	0	0	0	0	0	0	0	0
Rpb7	0	0	0	0	0	0	0	164	0
Cyp313a2	0	0	0	0	0	0	0	0	0
CG5602	0	0	0	0	0	0	0	165	0
Picot	0	0	0	0	0	0	0	0	0
CheB38b	0	8	0	0	49	0	0	80	0
IM2	0	0	0	0	0	0	0	0	0
CG14861	0	0	0	0	0	0	0	0	0
CG33301	0	0	0	0	0	0	0	0	0
CG33773	0	0	0	0	0	0	0	0	0
Ntl	0	0	0	0	0	0	0	0	0
Tsp2A	0	0	0	0	23	0	0	35	0
CG13426	0	0	0	0	0	0	0	0	0
Caf1-180	0	0	0	0	0	0	0	0	0
CG14787	0	0	0	0	0	0	0	166	0
CG7567	0	0	0	0	69	0	0	119	0
CG16837	0	0	0	0	96	0	0	167	0
CG14968	0	0	0	0	0	0	0	168	0
CG13321	0	0	0	0	97	0	0	169	0
CG1648	0	0	0	0	0	0	0	0	0
CG5968	0	0	0	0	0	0	0	0	0
CG10950	0	0	0	0	0	0	0	0	0
CG8774	0	0	0	0	98	0	0	170	0
Rab27	0	0	0	0	0	0	0	0	0
CG9129	0	0	0	0	0	0	0	0	0
Peritrophin-15b	0	0	0	0	75	0	0	131	0
CG14840	0	0	0	0	0	0	0	171	0
CG14302	0	0	0	0	0	0	0	0	0
CG15096	0	0	0	0	0	0	0	0	0
CG30177	0	0	0	0	83	0	0	144	0
dpa	0	0	0	0	0	0	0	0	0
CG32801	0	0	0	0	0	0	0	172	0
CG17974	0	0	0	0	0	0	0	173	0
CG15892	0	0	0	0	0	0	0	174	0
CG7544	0	0	0	0	0	0	0	0	0
mei-38	0	0	0	0	0	0	0	0	0
CG14154	0	0	0	0	0	0	0	175	0
CG31735	0	0	0	0	0	0	0	0	0
CG10433	0	0	0	0	0	0	0	0	0
CG17109	0	0	0	0	31	0	0	48	0
Elongin-C	0	0	0	0	0	0	0	0	0
Muc68Ca	0	0	0	0	0	0	0	0	0
CG13989	0	0	0	0	0	0	0	0	0
CG15425	0	0	0	0	0	0	0	0	0
CG31233	0	0	0	0	0	0	0	0	0
CG13047	0	0	0	0	0	0	0	176	0
mtSSB	0	0	0	0	0	0	0	0	0
CG5527	0	0	0	0	99	0	0	177	0
Mcm6	0	0	0	0	0	0	0	0	0
CG5556	0	0	0	0	100	0	0	178	0
CG5280	0	0	0	0	0	0	0	0	0
timeout	0	0	0	0	0	0	0	0	0
CG3222	0	0	0	0	34	0	0	53	0
CG9879	0	0	0	0	0	0	0	0	0
CG10592	0	0	0	0	0	0	0	0	0
CG32050	0	0	0	0	0	0	0	0	0
CG8785	0	0	0	0	0	0	0	0	0
CG32633	0	0	0	0	0	0	0	179	0
CG30373	0	0	0	0	86	0	0	147	0
CG13672	0	10	0	0	76	0	0	132	0
CG31949	0	0	0	0	88	0	0	152	0
CG9740	0	0	0	0	0	0	0	180	0
CG3597	0	0	0	0	0	0	0	0	0
CG8141	0	0	0	0	0	0	0	0	0
CG16838	0	0	0	0	0	0	0	181	0
M6	0	0	0	0	101	0	0	182	0
Patsas	0	0	0	0	0	0	0	0	0
CG31106	0	0	0	0	0	0	0	0	0
CG32692	0	0	0	0	81	0	0	137	0
CG17662	0	0	0	0	102	0	0	183	0
CG11967	0	0	0	0	0	0	0	0	0
CG6878	0	0	0	0	0	0	0	0	0
CG33490	0	0	0	0	0	0	0	0	0
CG5665	0	0	0	0	72	0	0	123	0
CG9568	0	0	0	0	62	0	0	103	0
Cpr11B	0	0	0	0	0	0	0	0	0
CG15093	0	0	0	0	0	0	0	0	0
CG14488	0	0	0	0	0	0	0	0	0
DNApol-delta	0	0	0	0	0	0	0	0	0
CG14033	0	0	0	0	0	0	0	0	0
CG17734	0	0	0	0	0	0	0	0	0
Cdlc2	0	0	0	0	100	0	0	178	0
CG11686	0	0	0	0	0	0	0	0	0
CG3526	0	12	0	0	0	0	0	100	0
CG3552	0	0	0	0	0	0	0	0	0
Try29f	0	0	0	0	0	0	0	0	0
CG4098	0	0	0	0	0	0	0	0	0
CG5217	0	0	0	0	0	0	0	0	0
CG33233	0	0	0	0	0	0	0	0	0
CG15260	0	0	0	0	0	0	0	0	0
CG31974	0	0	0	0	103	0	0	184	0
CG31050	0	0	0	0	0	0	0	0	0
CG12307	0	0	0	0	0	0	0	0	0
CG13086	0	0	0	0	0	0	0	0	0
CG7069	0	0	0	0	0	0	0	0	0
tomboy20	0	0	0	0	0	0	0	0	0
Ggamma1	0	0	0	0	0	0	0	0	0
CG11201	0	0	0	0	0	0	0	0	0
CG10116	0	0	0	0	0	0	0	0	0
CG11279	0	0	0	0	0	0	0	0	0
RPA2	0	0	0	0	0	0	0	0	0
ms(2)35Ci	0	0	0	0	0	0	0	0	0
CG31294	0	0	0	0	0	0	0	0	0
CG13392	0	0	0	0	77	0	0	133	0
Calx	0	0	0	0	0	0	0	0	0
CG13067	0	0	0	0	0	0	0	0	0
dup	0	0	0	0	104	0	0	185	0
CG14898	0	0	0	0	0	0	0	186	0
desat2	0	13	0	0	0	0	0	187	0
CG5599	0	0	0	0	105	0	0	188	0
CG10157	0	0	0	0	0	0	0	0	0
CG31975	0	0	0	0	103	0	0	184	0
sub	0	0	0	0	0	0	0	189	0
CG13218	0	0	0	0	13	0	0	20	0
CG3775	0	0	0	0	0	0	0	0	0
pgant4	0	0	0	0	106	0	0	190	0
CG2765	0	0	0	0	0	0	0	0	0
CG11588	0	0	0	0	0	0	0	0	0
CG14658	0	0	0	0	0	0	0	0	0
CG2680	0	0	0	0	80	0	0	136	0
CG4390	0	0	0	0	0	0	0	0	0
CG3565	0	0	0	0	40	0	0	64	0
LysP	0	0	0	0	0	0	0	0	0
CG12703	0	0	0	0	0	0	0	191	0
CG2574	0	0	0	0	0	0	0	0	0
CG12825	0	0	0	0	0	0	0	192	0
CG32850	0	0	0	0	0	0	0	0	0
CG33510	0	0	0	0	9	0	0	14	0
CG10738	0	0	0	0	0	0	0	0	0
CG2772	0	0	0	0	0	0	0	0	0
CG15293	0	0	0	0	0	0	0	193	0
CG14273	0	0	0	0	107	0	0	194	0
cav	0	0	0	0	0	0	0	0	0
CG33254	0	0	0	0	0	0	0	0	0
CG12901	0	0	0	0	0	0	0	0	0
CG12158	0	0	0	0	0	0	0	0	0
Obp56h	0	0	0	0	0	0	0	0	0
CG5150	0	0	0	0	0	0	0	0	0
CG13386	0	0	0	0	75	0	0	131	0
CG7637	0	0	0	0	0	0	0	0	0
CG14120	0	0	0	0	0	0	0	0	0
borr	0	0	0	0	0	0	0	0	0
Rad1	0	0	0	0	0	0	0	0	0
CG6693	0	0	0	0	0	0	0	0	0
NAAT1	0	0	0	0	0	0	0	0	0
Tpl94D	0	0	0	0	0	0	0	0	0
Pig1	0	0	0	0	0	0	0	0	0
CG1124	0	0	0	0	0	0	0	0	0
eIF4E-5	0	0	0	0	0	0	0	0	0
CG31882	0	0	0	0	0	0	0	0	0
CG30412	0	0	0	0	0	0	0	0	0
robl22E	0	0	0	0	88	0	0	152	0
CG31128	0	0	0	0	0	0	0	0	0
CG10165	0	0	0	0	0	0	0	0	0
Porin2	0	0	0	0	0	0	0	0	0
CG4078	0	0	0	0	36	0	0	58	0
MtnA	0	0	0	0	108	0	0	195	0
CG15828	0	0	0	0	0	0	0	0	0
obst-H	0	0	0	0	0	0	0	0	0
twiggy	0	0	0	0	0	0	0	0	0
Edg78E	0	0	0	0	0	0	0	0	0
CG14739	0	0	0	0	109	0	0	196	0
PpD5	0	0	0	0	0	0	0	0	0
CG7394	0	0	0	0	54	0	0	87	0
CG3332	0	0	0	0	0	0	0	0	0
CG31373	0	0	0	0	0	0	0	197	0
CG12857	0	0	0	0	0	0	0	142	0
CG18788	0	0	0	0	110	0	0	198	0
CG13511	0	0	0	0	42	0	0	66	0
CG11149	0	0	0	0	0	0	0	0	0
CG18810	0	0	0	0	111	0	0	199	0
CG7630	0	0	0	0	0	0	0	0	0
CG32240	0	0	0	0	0	0	0	0	0
CG11781	0	0	0	0	0	0	0	0	0
CG4970	0	0	0	0	0	0	0	0	0
CG15221	0	0	0	0	0	0	0	0	0
CG5532	0	0	0	0	0	0	0	25	0
CG13285	0	0	0	0	0	0	0	0	0
CG11262	0	0	0	0	0	0	0	0	0
bgm	0	0	0	0	0	0	0	0	0
Prosbeta5R	0	0	0	0	0	0	0	0	0
CG7251	0	0	0	0	112	0	0	200	0
CG5139	0	0	0	0	16	0	0	24	0
CG7695	0	0	0	0	0	0	0	0	0
CG12677	0	0	0	0	0	0	0	0	0
eco	0	0	0	0	0	0	0	0	0
PH4alphaPV	0	0	0	0	0	0	0	0	0
CG7710	0	0	0	0	0	0	0	0	0
CG11562	0	0	0	0	0	0	0	201	0
CG16782	0	0	0	0	0	0	0	0	0
CG12438	0	0	0	0	0	0	0	0	0
Rpb10	0	0	0	0	0	0	0	202	0
CG5883	0	0	0	0	0	0	0	0	0
CG30429	0	0	0	0	0	0	0	0	0
CG31867	0	0	0	0	0	0	0	0	0
CG14626	0	0	0	0	0	0	0	0	0
CG11726	0	0	0	0	0	0	0	0	0
CG5024	0	0	0	0	78	0	0	134	0
CG4161	0	0	0	0	0	0	0	0	0
CG5561	0	0	0	0	0	0	0	0	0
aay	0	0	0	0	0	0	0	0	0
CG33965	0	0	0	0	0	0	0	0	0
CG11671	0	0	0	0	21	0	0	31	0
Dh31	0	0	0	0	0	0	0	0	0
Cg12685	0	0	0	0	0	0	0	0	0
CG13704	0	0	0	0	0	0	0	0	0
CG7341	0	0	0	0	0	0	0	203	0
CG31776	0	0	0	0	106	0	0	190	0
CG2964	0	0	0	0	0	0	0	0	0
CG5388	0	0	0	0	87	0	0	149	0
LSm7	0	0	0	0	0	0	0	0	0
CG6661	0	0	0	0	0	0	0	204	0
CG4480	0	0	0	0	0	0	0	0	0
CG15734	0	0	0	0	0	0	0	0	0
CG6094	0	0	0	0	0	0	0	0	0
glob3	0	0	0	0	0	0	0	0	0
mu2	0	0	0	0	0	0	0	0	0
CG18493	0	0	0	0	113	0	0	205	0
HipHop	0	0	0	0	0	0	0	0	0
CG15536	0	0	0	0	0	0	0	0	0
CG12784	0	0	0	0	0	0	0	0	0
Adgf-C	0	0	0	0	0	0	0	206	0
CG32694	0	0	0	0	0	0	0	0	0
Mef2	0	0	0	0	0	0	0	0	0
CG33230	0	0	0	0	0	0	0	0	0
CG14274	0	0	0	0	107	0	0	194	0
Obp99a	0	0	0	0	0	0	0	0	0
CG32192	0	0	0	0	0	0	0	0	0
Tob	0	0	0	0	0	0	0	0	0
CG32819	0	0	0	0	0	0	0	0	0
Tom7	0	0	0	0	0	0	0	0	0
CG8840	0	0	0	0	0	0	0	0	0
CG5539	0	0	0	0	83	0	0	144	0
CG10170	0	0	0	0	0	0	0	0	0
CG9222	0	0	0	0	0	0	0	0	0
CG13283	0	0	0	0	89	0	0	156	0
CG10822	0	0	0	0	0	0	0	0	0
CG5724	0	0	0	0	0	0	0	0	0
CG8349	0	0	0	0	0	0	0	207	0
mRpS16	0	0	0	0	58	0	0	93	0
ttm2	0	0	0	0	0	0	0	0	0
Mcm7	0	0	0	0	0	0	0	0	0
CG14316	0	0	0	0	0	0	0	0	0
CG11961	0	0	0	0	0	0	0	0	0
tap66a	0	0	0	0	0	0	0	0	0
CG7081	0	0	0	0	57	0	0	92	0
CG31446	0	0	0	0	0	0	0	0	0
CG6074	0	0	0	0	0	0	0	208	0
CG33914	0	0	0	0	0	0	0	0	0
CG4860	0	0	0	0	0	0	0	0	0
CG5662	0	0	0	0	0	0	0	0	0
Orc4	0	0	0	0	0	0	0	0	0
CG13872	0	0	0	0	0	0	0	0	0
CG2249	0	0	0	0	0	0	0	0	0
CG4686	0	0	0	0	71	0	0	122	0
CG7573	0	0	0	0	0	0	0	0	0
CG15870	0	0	0	0	0	0	0	0	0
CG14036	0	0	0	0	0	0	0	209	0
CG12713	0	0	0	0	0	0	0	0	0
CG31360	0	0	0	0	0	0	0	0	0
CG5156	0	0	0	0	0	0	0	0	0
CG2291	0	0	0	0	0	0	0	0	0
CG13745	0	14	0	0	63	0	0	106	0
yip3	0	0	0	0	0	0	0	0	0
CG11898	0	0	0	0	0	0	0	0	0
CG18107	0	0	0	0	0	0	0	0	0
Tim13	0	0	0	0	0	0	0	0	0
nmdyn-D7	0	0	0	0	0	0	0	0	0
CG17207	0	0	0	0	0	0	0	187	0
CG32459	0	0	0	0	0	0	0	0	0
CG17564	0	0	0	0	0	0	0	0	0
CG13658	0	0	0	0	20	0	0	27	0
fru	0	0	0	0	0	0	0	0	0
TwdlG	0	0	0	0	0	0	0	0	0
CG11198	0	0	0	0	0	0	0	0	0
CG7252	0	0	0	0	0	0	0	0	0
CG15914	0	0	0	0	0	0	0	0	0
CG14736	0	0	0	0	109	0	0	196	0
Jheh3	0	0	0	0	44	0	0	75	0
CG17680	0	0	0	0	0	0	0	0	0
FucTD	0	0	0	0	0	0	0	0	0
CG16743	0	0	0	0	0	0	0	0	0
Slbp	0	0	0	0	0	0	0	0	0
CG6888	0	0	0	0	0	0	0	0	0
CG11125	0	0	0	0	0	0	0	138	0
CG33107	0	0	0	0	114	0	0	210	0
CG7603	0	0	0	0	0	0	0	0	0
MYPT-75D	0	0	0	0	0	0	0	0	0
CG18336	0	0	0	0	0	0	0	0	0
CG2014	0	0	0	0	0	0	0	0	0
CG4891	0	0	0	0	0	0	0	0	0
CG12310	0	0	0	0	5	0	0	8	0
Hex-t2	0	0	0	0	0	0	0	0	0
CG30058	0	0	0	0	27	0	0	40	0
CG11291	0	0	0	0	26	0	0	39	0
CG15323	0	0	0	0	0	0	0	0	0
CG16753	0	0	0	0	0	0	0	211	0
spn-B	0	0	0	0	0	0	0	0	0
CG5398	0	0	0	0	102	0	0	183	0
CG30375	0	0	0	0	0	0	0	0	0
Prosalpha6T	0	0	0	0	0	0	0	212	0
CG30219	0	0	0	0	42	0	0	66	0
CG3492	0	0	0	0	96	0	0	167	0
Pdsw	0	0	0	0	106	0	0	190	0
Cg12684	0	0	0	0	0	0	0	0	0
CG15657	0	0	0	0	0	0	0	0	0
CG8837	0	0	0	0	0	0	0	0	0
Orc5	0	0	0	0	0	0	0	213	0
CG11200	0	0	0	0	0	0	0	0	0
CG11110	0	0	0	0	0	0	0	0	0
CG1961	0	0	0	0	0	0	0	0	0
CG10953	0	0	0	0	0	0	0	0	0
CG31546	0	0	0	0	0	0	0	0	0
agt	0	0	0	0	0	0	0	0	0
CG17237	0	0	0	0	88	0	0	152	0
RpL39	0	0	0	0	0	0	0	0	0
CG4459	0	0	0	0	0	0	0	0	0
CG3719	0	0	0	0	0	0	0	0	0
cdc2c	0	0	0	0	0	0	0	0	0
CG9743	0	0	0	0	0	0	0	0	0
CG9101	0	0	0	0	0	0	0	0	0
CG32013	0	0	0	0	0	0	0	0	0
Fie	0	0	0	0	0	0	0	0	0
CG17380	0	0	0	0	0	0	0	214	0
CG3092	0	0	0	0	0	0	0	0	0
CG7164	0	0	0	0	0	0	0	215	0
CG15578	0	0	0	0	0	0	0	0	0
CG9436	0	0	0	0	0	0	0	0	0
CG17005	0	0	0	0	79	0	0	0	0
RnrL	0	0	0	0	0	0	0	0	0
CG18343	0	0	0	0	0	0	0	0	0
Pms2	0	0	0	0	104	0	0	185	0
CG9550	0	0	0	0	0	0	0	216	0
CG14185	0	0	0	0	0	0	0	72	0
CG12464	0	0	0	0	0	0	0	0	0
CG32027	0	0	0	0	0	0	0	0	0
CG12679	0	0	0	0	0	0	0	0	0
nxf4	0	0	0	0	0	0	0	0	0
CG13033	0	0	0	0	0	0	0	0	0
CG5664	0	0	0	0	0	0	0	0	0
CG15642	0	15	0	0	0	0	0	217	0
CG13280	0	0	0	0	115	0	0	218	0
tgy	0	0	0	0	116	0	0	219	0
CG34021	0	0	0	0	0	0	0	220	0
CG5755	0	0	0	0	0	0	0	221	0
CG31806	0	0	0	0	0	0	0	0	0
CG11694	0	0	0	0	0	0	0	222	0
CG11703	0	0	0	0	0	0	0	0	0
CG14448	0	0	0	0	0	0	0	0	0
Cyp4e1	0	0	0	0	59	0	0	95	0
SmD2	0	0	0	0	0	0	0	0	0
CG10014	0	0	0	0	0	0	0	0	0
phr6-4	0	0	0	0	111	0	0	199	0
CG5853	0	0	0	0	0	0	0	0	0
mRpS6	0	0	0	0	0	0	0	0	0
Aph-4	0	0	0	0	0	0	0	223	0
ast	0	0	0	0	0	0	0	0	0
CG1824	0	0	0	0	0	0	0	0	0
CG30432	0	0	0	0	0	0	0	73	0
CG8776	0	0	0	0	0	0	0	224	0
CG9413	0	0	0	0	0	0	0	225	0
CG8891	0	0	0	0	117	0	0	226	0
Ugt36Bc	0	0	0	0	115	0	0	218	0
CG31286	0	0	0	0	0	0	0	0	0
tomb	0	0	0	0	0	0	0	0	0
UK114	0	0	0	0	0	0	0	0	0
CG14615	0	0	0	0	0	0	0	0	0
CG7181	0	0	0	0	0	0	0	0	0
gb	0	0	0	0	0	0	0	0	0
st	0	0	0	0	0	0	0	227	0
CG4624	0	0	0	0	0	0	0	0	0
SpdS	0	0	0	0	0	0	0	0	0
RpL24-like	0	0	0	0	0	0	0	0	0
CG15780	0	0	0	0	0	0	0	0	0
Ac13E	0	0	0	0	0	0	0	0	0
desat1	0	0	0	0	0	0	0	187	0
CG16741	0	0	0	0	0	0	0	0	0
CG13725	0	0	0	0	0	0	0	0	0
CG7551	0	0	0	0	0	0	0	0	0
Cyp313a3	0	0	0	0	0	0	0	0	0
CG6629	0	0	0	0	0	0	0	0	0
CG15172	0	0	0	0	0	0	0	0	0
CG9573	0	0	0	0	0	0	0	0	0
CG3430	0	0	0	0	0	0	0	228	0
CG15258	0	0	0	0	0	0	0	0	0
CG7529	0	0	0	0	101	0	0	182	0
gskt	0	0	0	0	0	0	0	0	0
CG14921	0	0	0	0	0	0	0	0	0
CG10113	0	0	0	0	0	0	0	0	0
mRpL4	0	0	0	0	0	0	0	0	0
CG15475	0	0	0	0	0	0	0	0	0
CG32445	0	0	0	0	0	0	0	0	0
RFeSP	0	0	0	0	0	0	0	230	0
RpS5b	0	0	0	0	118	0	0	231	0
dap	0	0	0	0	0	0	0	232	0
CG18545	0	0	0	0	0	0	0	0	0
CG18624	0	0	0	0	0	0	0	233	0
CG14931	0	0	0	0	94	0	0	162	0
Dak1	0	0	0	0	0	0	0	0	0
nopo	0	0	0	0	0	0	0	0	0
baf	0	0	0	0	0	0	0	0	0
CG15196	0	0	0	0	0	0	0	0	0
CG5991	0	0	0	0	0	0	0	0	0
CG31267	0	0	0	0	0	0	0	0	0
Ptx1	0	0	0	0	0	0	0	0	0
CG8204	0	0	0	0	0	0	0	234	0
Obp18a	0	0	0	0	0	0	0	0	0
CG13364	0	0	0	0	119	0	0	235	0
Amy-d	0	0	0	0	0	0	0	236	0
CG31875	0	0	0	0	0	0	0	0	0
CG6933	0	0	0	0	35	0	0	55	0
CG30151	0	0	0	0	0	0	0	0	0
CG30184	0	0	0	0	0	0	0	237	0
Grip71	0	0	0	0	120	0	0	238	0
CG15556	0	0	0	0	0	0	0	0	0
oho23B	0	0	0	0	0	0	0	239	0
CG9065	0	0	0	0	105	0	0	188	0
CG31804	0	0	0	0	0	0	0	0	0
CG32441	0	0	0	0	0	0	0	0	0
CG8773	0	0	0	0	98	0	0	170	0
Caf1-105	0	0	0	0	0	0	0	0	0
SelG	0	0	0	0	0	0	0	0	0
RpL29	0	0	0	0	67	0	0	117	0
CG5590	0	0	0	0	0	0	0	0	0
CG32068	0	0	0	0	0	0	0	0	0
CG8006	0	0	0	0	0	0	0	0	0
Oda	0	0	0	0	0	0	0	0	0
capaR	0	0	0	0	0	0	0	240	0
CG4476	0	0	0	0	0	0	0	0	0
Odc1	0	0	0	0	41	0	0	65	0
CG31802	0	0	0	0	0	0	0	0	0
CG13991	0	0	0	0	0	0	0	0	0
CG31769	0	0	0	0	0	0	0	193	0
CG4810	0	0	0	0	0	0	0	0	0
CG4951	0	0	0	0	99	0	0	177	0
mRpL12	0	0	0	0	0	0	0	0	0
CG7026	0	0	0	0	118	0	0	231	0
MED20	0	0	0	0	0	0	0	0	0
mex1	0	0	0	0	32	0	0	0	0
CG17145	0	0	0	0	35	0	0	55	0
CG8197	0	0	0	0	0	0	0	0	0
Mpcp	0	0	0	0	0	0	0	0	0
CG13405	0	0	0	0	0	0	0	0	0
Tak12	0	0	0	0	0	0	0	0	0
CG3748	0	0	0	0	0	0	0	0	0
CG31198	0	0	0	0	0	0	0	0	0
Jafrac1	0	0	0	0	0	0	0	0	0
CG11050	0	0	0	0	0	0	0	0	0
Grx-1	0	0	0	0	0	0	0	0	0
CG13369	0	0	0	0	119	0	0	235	0
CG5265	0	0	0	0	0	0	0	241	0
CG31087	0	0	0	0	68	0	0	118	0
Rpb5	0	0	0	0	121	0	0	242	0
Gclm	0	0	0	0	0	0	0	0	0
Nacalpha	0	0	0	0	0	0	0	243	0
CG10202	0	0	0	0	0	0	0	0	0
CG9392	0	0	0	0	0	0	0	0	0
CG32230	0	0	0	0	0	0	0	0	0
CG13110	0	0	0	0	0	0	0	0	0
CG5359	0	0	0	0	0	0	0	244	0
CG17377	0	0	0	0	0	0	0	0	0
CG12721	0	0	0	0	0	0	0	0	0
CG31344	0	0	0	0	0	0	0	164	0
RpS16	0	0	0	0	0	0	0	0	0
CG9205	0	0	0	0	0	0	0	0	0
CG10845	0	0	0	0	0	0	0	245	0
dgt6	0	0	0	0	0	0	0	0	0
CG3687	0	0	0	0	0	0	0	246	0
CG31832	0	0	0	0	0	0	0	247	0
l(2)dtl	0	0	0	0	0	0	0	0	0
CG8038	0	0	0	0	0	0	0	0	0
CG16892	0	0	0	0	0	0	0	0	0
CG3792	0	0	0	0	117	0	0	226	0
CG15438	0	0	0	0	0	0	0	248	0
robl37BC	0	0	0	0	122	0	0	249	0
CG13544	0	0	0	0	0	0	0	0	0
CG13202	0	0	0	0	0	0	0	250	0
CG30105	0	0	0	0	0	0	0	251	0
Pros28.1A	0	0	0	0	0	0	0	0	0
CG10664	0	0	0	0	85	0	0	146	0
CG8142	0	0	0	0	0	0	0	0	0
Muc18B	0	0	0	0	0	0	0	0	0
CG31204	0	0	0	0	0	0	0	0	0
CG14879	0	0	0	0	0	0	0	0	0
CG32195	0	0	0	0	0	0	0	203	0
Prx5037	0	0	0	0	0	0	0	0	0
CG14011	0	0	0	0	112	0	0	200	0
CG15194	0	0	0	0	0	0	0	0	0
CG5435	0	0	0	0	0	0	0	252	0
CG8043	0	0	0	0	0	0	0	0	0
Dph5	0	0	0	0	114	0	0	210	0
WDR79	0	0	0	0	0	0	0	0	0
CG30051	0	0	0	0	123	0	0	253	0
CG18815	0	0	0	0	0	0	0	0	0
CG12194	0	0	0	0	0	0	0	0	0
CG4615	0	0	0	0	0	0	0	0	0
CG31960	0	0	0	0	0	0	0	0	0
CG5565	0	0	0	0	0	0	0	0	0
CG9240	0	0	0	0	0	0	0	0	0
RluA-1	0	0	0	0	0	0	0	0	0
Bj1	0	0	0	0	0	0	0	0	0
CG3434	0	0	0	0	0	0	0	0	0
mus101	0	0	0	0	0	0	0	0	0
CG12147	0	0	0	0	0	0	0	0	0
eyc	0	0	0	0	0	0	0	0	0
CG14955	0	0	0	0	0	0	0	0	0
CG8236	0	0	0	0	0	0	0	0	0
CG30371	0	0	0	0	0	0	0	0	0
Hydr1	0	0	0	0	0	0	0	0	0
CG6981	0	0	0	0	0	0	0	0	0
geminin	0	0	0	0	0	0	0	0	0
CG5767	0	0	0	0	18	0	0	26	0
CG15708	0	0	0	0	0	0	0	0	0
CG4329	0	0	0	0	0	0	0	0	0
mRpL21	0	0	0	0	0	0	0	0	0
CSN1a	0	0	0	0	92	0	0	160	0
oho23b	0	0	0	0	0	0	0	0	0
CG14269	0	0	0	0	0	0	0	0	0
CG4980	0	0	0	0	0	0	0	0	0
Jheh1	0	0	0	0	44	0	0	75	0
CG12479	0	0	0	0	0	0	0	0	0
RpS20	0	0	0	0	0	0	0	0	0
FucTA	0	0	0	0	0	0	0	0	0
CG30278	0	0	0	0	26	0	0	39	0
CG3215	0	0	0	0	66	0	0	113	0
RpS14b	0	0	0	0	124	0	0	254	0
CG2209	0	0	0	0	0	0	0	0	0
CG33500	0	0	0	0	0	0	0	0	0
CG13040	0	0	0	0	0	0	0	0	0
CG31679	0	0	0	0	0	0	0	0	0
Cchl	0	0	0	0	0	0	0	0	0
Adgf-E	0	0	0	0	0	0	0	0	0
cad	0	0	0	0	0	0	0	0	0
CG1076	0	0	0	0	0	0	0	0	0
CG17944	0	0	0	0	51	0	0	83	0
CG18180	0	0	0	0	0	0	0	255	0
Roe1	0	0	0	0	0	0	0	0	0
CG30324	0	0	0	0	0	0	0	0	0
CG6293	0	0	0	0	0	0	0	256	0
CG14370	0	0	0	0	37	0	0	59	0
CG17150	0	0	0	0	0	0	0	0	0
Muc55B	0	0	0	0	0	0	0	0	0
CG8331	0	0	0	0	58	0	0	93	0
CG32118	0	0	0	0	0	0	0	0	0
CG33704	0	0	0	0	0	0	0	0	0
CG6836	0	0	0	0	0	0	0	0	0
CG13315	0	0	0	0	0	0	0	0	0
CG8300	0	0	0	0	0	0	0	257	0
Obp58d	0	0	0	0	90	0	0	157	0
RpS23	0	0	0	0	0	0	0	0	0
CG7465	0	0	0	0	53	0	0	86	0
Oscp	0	0	0	0	0	0	0	258	0
CG7580	0	0	0	0	0	0	0	0	0
CG12020	0	0	0	0	0	0	0	259	0
Spt-I	0	0	0	0	0	0	0	260	0
CG12609	0	0	0	0	0	0	0	0	0
CG6180	0	0	0	0	0	0	0	261	0
dro6	0	0	0	0	0	0	0	0	0
Bace	0	0	0	0	0	0	0	0	0
Tsp29Fb	0	0	0	0	0	0	0	0	0
Sr-CIV	0	0	0	0	0	0	0	0	0
CG9603	0	0	0	0	70	0	0	120	0
CG4769	0	0	0	0	0	0	0	0	0
Cp110	0	0	0	0	0	0	0	0	0
CG11329	0	16	0	0	0	0	0	262	0
hale	0	0	0	0	0	0	0	263	0
GXIVsPLA2	0	0	0	0	0	0	0	70	0
Ugt36Ba	0	0	0	0	115	0	0	0	0
CG32945	0	0	0	0	0	0	0	0	0
Rpl10ab	0	0	0	0	0	0	0	0	0
sra	0	0	0	0	0	0	0	0	0
cm	0	11	0	0	95	0	0	163	0
CG3884	0	0	0	0	97	0	0	169	0
CG17856	0	0	0	0	0	0	0	0	0
zetaTry	0	0	0	0	1	0	0	1	0
CG6893	0	0	0	0	0	0	0	0	0
RpL36	0	0	0	0	0	0	0	0	0
kdn	0	0	0	0	0	0	0	0	0
CG9589	0	0	0	0	0	0	0	0	0
CG32572	0	0	0	0	0	0	0	0	0
CG3734	0	0	0	0	113	0	0	205	0
CG5781	0	0	0	0	0	0	0	264	0
Obp58b	0	0	0	0	90	0	0	157	0
pch2	0	0	0	0	0	0	0	0	0
CG12025	0	0	0	0	0	0	0	0	0
Ndae1	0	0	0	0	0	0	0	0	0
CG4301	0	0	0	0	125	0	0	265	0
Fancl	0	0	0	0	0	0	0	0	0
CG6409	0	0	0	0	0	0	0	0	0
CG5096	0	0	0	0	0	0	0	0	0
Gclc	0	0	0	0	0	0	0	0	0
bai	0	0	0	0	0	0	0	0	0
cyp28c1	0	0	0	0	0	0	0	0	0
RpL30	0	0	0	0	122	0	0	249	0
CG9981	0	0	0	0	125	0	0	265	0
CG31674	0	0	0	0	0	0	0	266	0
CG12729	0	0	0	0	0	0	0	0	0
CG5037	0	0	0	0	0	0	0	0	0
CG9350	0	0	0	0	0	0	0	0	0
CG17375	0	0	0	0	0	0	0	0	0
CG15337	0	0	0	0	0	0	0	0	0
nompC	0	0	0	0	0	0	0	0	0
CG7712	0	0	0	0	121	0	0	242	0
Hmx	0	0	0	0	0	0	0	0	0
wntD	0	0	0	0	98	0	0	170	0
TrpA1	0	0	0	0	0	0	0	0	0
RpS28b	0	0	0	0	0	0	0	0	0
Sod	0	0	0	0	0	0	0	0	0
l(3)S147910	0	0	0	0	0	0	0	0	0
CG9836	0	0	0	0	0	0	0	0	0
l(2)01810	0	0	0	0	110	0	0	198	0
CG2267	0	0	0	0	0	0	0	0	0
HmgZ	0	0	0	0	0	0	0	0	0
CG8323	0	0	0	0	58	0	0	93	0
CG8292	0	0	0	0	0	0	0	0	0
ste14	0	0	0	0	0	0	0	0	0
CG15395	0	0	0	0	0	0	0	0	0
RpS17	0	0	0	0	0	0	0	0	0
CG3557	0	0	0	0	0	0	0	0	0
Cby	0	0	0	0	0	0	0	0	0
CG9235	0	0	0	0	0	0	0	0	0
Atox1	0	0	0	0	0	0	0	0	0
CG15882	0	0	0	0	116	0	0	219	0
CG12782	0	0	0	0	0	0	0	0	0
Bet1	0	0	0	0	0	0	0	0	0
RpS29	0	0	0	0	108	0	0	195	0
Fancd2	0	0	0	0	0	0	0	0	0
e(y)2b	0	0	0	0	0	0	0	0	0
CG31792	0	0	0	0	0	0	0	267	0
Dpit47	0	0	0	0	0	0	0	0	0
CG17041	0	0	0	0	0	0	0	0	0
CG2053	0	0	0	0	0	0	0	0	0
CG6333	0	0	0	0	0	0	0	0	0
CG18139	0	0	0	0	0	0	0	0	0
slam	0	0	0	0	0	0	0	0	0
CG8636	0	0	0	0	0	0	0	0	0
Rps12	0	0	0	0	0	0	0	0	0
tefu	0	0	0	0	0	0	0	0	0
hoe1	0	0	0	0	0	0	0	0	0
CG30060	0	0	0	0	0	0	0	0	0
CG13036	0	0	0	0	0	0	0	0	0
Vha36	0	0	0	0	0	0	0	268	0
CG33791	0	0	0	0	0	0	0	269	0
CG3494	0	0	0	0	96	0	0	167	0
CG8051	0	0	0	0	0	0	0	0	0
Rtc1	0	0	0	0	0	0	0	0	0
Apc7	0	0	0	0	0	0	0	0	0
CG14500	0	0	0	0	0	0	0	0	0
Hex-t1	0	0	0	0	0	0	0	0	0
CG18675	0	0	0	0	0	0	0	0	0
esc	0	0	0	0	0	0	0	0	0
RpS30	0	0	0	0	0	0	0	0	0
sni	0	0	0	0	0	0	0	0	0
CG9894	0	0	0	0	0	0	0	0	0
CG31090	0	0	0	0	0	0	0	270	0
CG13189	0	0	0	0	126	0	0	271	0
CG3940	0	0	0	0	55	0	0	89	0
alphaTry	0	0	0	0	1	0	0	1	0
Psf3	0	0	0	0	0	0	0	0	0
CG30015	0	0	0	0	0	0	0	0	0
CG12691	0	0	0	0	0	0	0	0	0
CG8321	0	0	0	0	0	0	0	0	0
Prosbeta2R2	0	0	0	0	0	0	0	0	0
Dcp-1	0	0	0	0	0	0	0	0	0
RpL10Ab	0	0	0	0	0	0	0	0	0
nvy	0	0	0	0	0	0	0	0	0
RfC38	0	0	0	0	0	0	0	0	0
RpL36A	0	0	0	0	0	0	0	0	0
CG15330	0	0	0	0	0	0	0	272	0
CG8661	0	0	0	0	0	0	0	0	0
CG3814	0	0	0	0	0	0	0	273	0
CG10778	0	0	0	0	124	0	0	254	0
CG10298	0	0	0	0	0	0	0	0	0
CG5718	0	0	0	0	0	0	0	0	0
RpS3	0	0	0	0	0	0	0	0	0
CG11801	0	0	0	0	10	0	0	15	0
Ir	0	0	0	0	0	0	0	0	0
CG10863	0	0	0	0	0	0	0	0	0
Proc-R	0	0	0	0	0	0	0	0	0
SuUR	0	0	0	0	0	0	0	0	0
CG31004	0	0	0	0	0	0	0	0	0
Tim10	0	0	0	0	0	0	0	274	0
CG10373	0	0	0	0	120	0	0	238	0
CG2196	0	0	0	0	33	0	0	49	0
ifc	0	0	0	0	0	0	0	0	0
Myo31DF	0	0	0	0	0	0	0	0	0
CG13424	0	0	0	0	0	0	0	0	0
inx5	0	0	0	0	0	0	0	0	0
mip120	0	0	0	0	0	0	0	0	0
pie	0	0	0	0	0	0	0	0	0
CG8520	0	0	0	0	0	0	0	0	0
CG1532	0	0	0	0	0	0	0	0	0
RpL27	0	0	0	0	0	0	0	0	0
ial	0	0	0	0	0	0	0	0	0
CG12116	0	0	0	0	0	0	0	275	0
CG7970	0	0	0	0	0	0	0	0	0
His2Av	0	0	0	0	0	0	0	0	0
RpL24	0	0	0	0	0	0	0	276	0
l(2)37Cd	0	0	0	0	0	0	0	0	0
CG17625	0	0	0	0	0	0	0	0	0
RpA-70	0	0	0	0	93	0	0	161	0
Ndc80	0	0	0	0	0	0	0	0	0
CG18324	0	0	0	0	58	0	0	93	0
CG6262	0	0	0	0	0	0	0	0	0
CG1578	0	0	0	0	0	0	0	0	0
Prosbeta4R1	0	0	0	0	0	0	0	0	0
Zfrp8	0	0	0	0	0	0	0	0	0
CG32463	0	0	0	0	0	0	0	0	0
Prosbeta2R1	0	0	0	0	0	0	0	0	0
stck	0	0	0	0	0	0	0	0	0
Ipk1	0	0	0	0	0	0	0	0	0
Crtp	0	0	0	0	0	0	0	278	0
CG30038	0	0	0	0	126	0	0	271	0
d-cup	0	0	0	0	0	0	0	0	0
RpL27A	0	0	0	0	0	0	0	0	0
RpS7	0	0	0	0	50	0	0	82	0
CG4073	0	0	0	0	0	0	0	197	0
SdhA	0	0	0	0	0	0	0	0	0
cal1	0	0	0	0	0	0	0	0	0
frc	0	0	0	0	0	0	0	0	0
RpS9	0	0	0	0	0	0	0	0	0
CG1553	0	0	0	0	0	0	0	0	0
CG8831	0	0	0	0	123	0	0	253	0
CG31740	0	0	0	0	0	0	0	0	0
sphinx	0	0	0	0	0	0	0	0	0
CG33169	0	0	0	0	0	0	0	0	0
Cpr62Bc	0	0	0	0	0	0	0	0	0
CG11455	0	0	0	0	0	0	0	0	0
CG9825	0	0	0	0	0	0	0	0	0
CG15863	0	0	0	0	0	0	0	0	0
CG16898	0	0	0	0	0	0	0	0	0
loopin-1	0	0	0	0	0	0	0	0	0
CG12902	0	0	0	0	0	0	0	0	0
CG31988	0	0	0	0	0	0	0	0	0
CG32652	0	0	0	0	0	0	0	0	0
Mst98Ca	0	0	0	0	0	0	0	0	0
CG9920	0	0	0	0	0	0	0	0	0
CG13674	0	0	0	0	0	0	0	0	0
Ccp84Ad	0	0	0	0	0	0	0	0	0
CG10252	0	0	0	0	0	0	0	0	0
CG13078	0	0	0	0	0	0	0	0	0
CG31926	0	0	0	0	0	0	0	0	0
CG4830	0	0	0	0	0	0	0	0	0
CG31259	0	0	0	0	0	0	0	0	0
CG1288	0	0	0	0	0	0	0	0	0
Cyt-c-d	0	0	0	0	0	0	0	0	0
CG9975	0	0	0	0	0	0	0	0	0
S6k	0	0	0	0	0	0	0	0	0
CG3746	0	0	0	0	0	0	0	0	0
CG3124	0	0	0	0	0	0	0	0	0
exu	0	0	0	0	0	0	0	0	0
CG31206	0	0	0	0	0	0	0	0	0
CG4962	0	0	0	0	0	0	0	0	0
CG13340	0	0	0	0	0	0	0	0	0
sut4	0	0	0	0	0	0	0	0	0
CG15126	0	0	0	0	0	0	0	0	0
CG33340	0	0	0	0	0	0	0	0	0
djl	0	0	0	0	0	0	0	0	0
soti	0	0	0	0	0	0	0	0	0
CG9034	0	0	0	0	0	0	0	0	0
ox	0	0	0	0	0	0	0	0	0
CG6380	0	0	0	0	0	0	0	0	0
CG1324	0	0	0	0	0	0	0	0	0
CG6304	0	0	0	0	0	0	0	0	0
CG16996	0	0	0	0	0	0	0	0	0
CG4218	0	0	0	0	0	0	0	0	0
CG32388	0	0	0	0	0	0	0	0	0
CG11659	0	0	0	0	0	0	0	0	0
CG4692	0	0	0	0	0	0	0	0	0
CG12689	0	0	0	0	0	0	0	0	0
CG17086	0	0	0	0	0	0	0	0	0
CG17298	0	0	0	0	0	0	0	0	0
CG5538	0	0	0	0	0	0	0	0	0
CG15201	0	0	0	0	0	0	0	0	0
CG12400	0	0	0	0	0	0	0	0	0
Mst98Cb	0	0	0	0	0	0	0	0	0
CG6372	0	0	0	0	0	0	0	0	0
mthl4	0	0	0	0	0	0	0	0	0
CG14191	0	0	0	0	0	0	0	0	0
Cyp18a1	0	0	0	0	0	0	0	0	0
CG8316	0	0	0	0	0	0	0	0	0
CG6332	0	0	0	0	0	0	0	0	0
CG31819	0	0	0	0	0	0	0	0	0
CG31709	0	0	0	0	0	0	0	0	0
CG5017	0	0	0	0	0	0	0	0	0
CG10344	0	0	0	0	0	0	0	0	0
dro2	0	0	0	0	0	0	0	0	0
CG2955	0	0	0	0	0	0	0	0	0
CG15829	0	0	0	0	0	0	0	135	0
CG5089	0	0	0	0	0	0	0	0	0
Tim17b2	0	0	0	0	0	0	0	0	0
IM23	0	0	0	0	0	0	0	0	0
MtnD	0	0	0	0	0	0	0	0	0
CG4269	0	0	0	0	0	0	0	0	0
CG9306	0	0	0	0	0	0	0	0	0
CG13245	0	0	0	0	0	0	0	0	0
CG33977	0	0	0	0	0	0	0	0	0
CG15088	0	0	0	0	0	0	0	0	0
CG3330	0	0	0	0	0	0	0	0	0
CG1394	0	0	0	0	0	0	0	0	0
CG15067	0	0	0	0	0	0	0	0	0
CG15820	0	0	0	0	0	0	0	0	0
CG32081	0	0	0	0	0	0	0	0	0
CG31787	0	0	0	0	0	0	0	0	0
CG1137	0	0	0	0	0	0	0	0	0
CG4323	0	0	0	0	0	0	0	0	0
CG6255	0	0	0	0	0	0	0	0	0
CG10841	0	0	0	0	0	0	0	0	0
CG4836	0	0	0	0	0	0	0	0	0
CG31624	0	0	0	0	0	0	0	0	0
Lcp65Ac	0	0	0	0	0	0	0	0	0
CG30217	0	0	0	0	0	0	0	0	0
CG15306	0	0	0	0	0	0	0	0	0
CG33309	0	0	0	0	0	0	0	0	0
ergic53	0	0	0	0	0	0	0	0	0
CG7886	0	0	0	0	0	0	0	0	0
CG31058	0	0	0	0	0	0	0	0	0
CG8564	0	0	0	0	0	0	0	0	0
CG15739	0	0	0	0	0	0	0	0	0
CG11373	0	0	0	0	0	0	0	0	0
CG32064	0	0	0	0	0	0	0	0	0
Cpr49Af	0	0	0	0	0	0	0	0	0
TpnC25D	0	0	0	0	0	0	0	0	0
CG12860	0	0	0	0	0	0	0	0	0
CG15177	0	0	0	0	0	0	0	0	0
CG30503	0	0	0	0	0	0	0	0	0
GstD9	0	0	0	0	0	0	0	0	0
CG30376	0	0	0	0	0	0	0	0	0
CG1999	0	0	0	0	0	0	0	0	0
CG4434	0	0	0	0	0	0	0	0	0
Mst35Ba	0	0	0	0	0	0	0	0	0
CG15136	0	0	0	0	0	0	0	0	0
CG4691	0	0	0	0	0	0	0	0	0
CG4439	0	0	0	0	0	0	0	0	0
krimp	0	0	0	0	0	0	0	0	0
Rpt4R	0	0	0	0	0	0	0	0	0
CG5048	0	0	0	0	0	0	0	0	0
l(2)34Fc	0	0	0	0	0	0	0	0	0
TrxT	0	0	0	0	0	0	0	0	0
CG9672	0	0	0	0	0	0	0	0	0
CG32351	0	0	0	0	0	0	0	0	0
mtacp1	0	0	0	0	0	0	0	0	0
TpnC47D	0	0	0	0	0	0	0	0	0
fan	0	0	0	0	0	0	0	0	0
CG33322	0	0	0	0	0	0	0	0	0
CG13473	0	0	0	0	0	0	0	0	0
CG16857	0	0	0	0	0	0	0	0	0
CG5157	0	0	0	0	0	0	0	0	0
CG4019	0	0	0	0	0	0	0	0	0
CG9906	0	0	0	0	0	0	0	0	0
CG10320	0	0	0	0	0	0	0	0	0
Hsp68	0	0	0	0	0	0	0	0	0
CG15422	0	0	0	0	0	0	0	0	0
Cp38	0	0	0	0	0	0	0	0	0
CG5762	0	0	0	0	0	0	0	0	0
CG32371	0	0	0	0	0	0	0	0	0
CG6484	0	0	0	0	0	0	0	0	0
CG5790	0	0	0	0	0	0	0	0	0
CG2857	0	0	0	0	0	0	0	0	0
cype	0	0	0	0	0	0	0	0	0
CG17098	0	0	0	0	0	0	0	0	0
CG32069	0	0	0	0	0	0	0	0	0
CG9010	0	0	0	0	0	0	0	0	0
TwdlBeta	0	0	0	0	0	0	0	0	0
CG4101	0	0	0	0	0	0	0	0	0
CG15353	0	0	0	0	0	0	0	0	0
l(3)87Df	0	0	0	0	0	0	0	0	0
Mst33A	0	0	0	0	0	0	0	0	0
CG13559	0	0	0	0	0	0	0	0	0
CG14540	0	0	0	0	0	0	0	0	0
yellow-g	0	0	0	0	0	0	0	0	0
CG10919	0	0	0	0	0	0	0	0	0
bl	0	0	0	0	0	0	0	0	0
CG14691	0	0	0	0	0	0	0	0	0
CG32263	0	0	0	0	0	0	0	0	0
CG13477	0	0	0	0	0	0	0	0	0
Baldspot	0	0	0	0	0	0	0	0	0
CG4988	0	0	0	0	0	0	0	0	0
CG5704	0	0	0	0	0	0	0	0	0
CG6652	0	0	0	0	0	0	0	0	0
Fis1	0	0	0	0	0	0	0	0	0
CG5835	0	0	0	0	0	0	0	0	0
CG4955	0	0	0	0	0	0	0	0	0
CG6610	0	0	0	0	0	0	0	0	0
Ubc84D	0	0	0	0	0	0	0	0	0
CG10164	0	0	0	0	0	0	0	0	0
CG12362	0	0	0	0	0	0	0	0	0
CG15068	0	0	0	0	0	0	0	0	0
mRpS18A	0	0	0	0	0	0	0	0	0
CG11327	0	0	0	0	0	0	0	0	0
CG10912	0	0	0	0	0	0	0	0	0
Cht12	0	0	0	0	0	0	0	0	0
CG9394	0	0	0	0	0	0	0	0	0
CG5075	0	0	0	0	0	0	0	0	0
CG15498	0	0	0	0	0	0	0	0	0
TBPH	0	0	0	0	0	0	0	279	0
Bka	0	17	0	0	0	0	0	280	0
CG14835	0	0	0	0	0	0	0	0	0
CG1311	0	0	0	0	0	0	0	0	0
CG4712	0	0	0	0	0	0	0	0	0
Actn3	0	0	0	0	0	0	0	0	0
CG32548	0	0	0	0	0	0	0	0	0
Obp83g	0	0	0	0	0	0	0	0	0
CG17664	0	0	0	0	0	0	0	0	0
Ag5r2	0	0	0	0	0	0	0	0	0
CG3213	0	0	0	0	0	0	0	0	0
CG15879	0	0	0	0	0	0	0	0	0
mRpL33	0	0	0	0	0	0	0	0	0
CG17572	0	0	0	0	0	0	0	0	0
CG3982	0	0	0	0	0	0	0	0	0
CG11929	0	0	0	0	0	0	0	0	0
CG18418	0	0	0	0	0	0	0	0	0
CG33060	0	0	0	0	0	0	0	0	0
CG11079	0	0	0	0	0	0	0	0	0
CG30065	0	0	0	0	0	0	0	0	0
CG18213	0	0	0	0	0	0	0	0	0
CG12493	0	0	0	0	0	0	0	0	0
RhoGAPp190	0	0	0	0	0	0	0	0	0
CG7142	0	0	0	0	0	0	0	0	0
CG2709	0	18	0	0	0	0	0	281	0
Tsp66A	0	0	0	0	0	0	0	0	0
CG10748	0	0	0	0	0	0	0	0	0
CG18581	0	0	0	0	0	0	0	0	0
CG15155	0	0	0	0	0	0	0	0	0
CG11852	0	0	0	0	0	0	0	0	0
CG14718	0	0	0	0	0	0	0	0	0
CG16739	0	0	0	0	0	0	0	0	0
CG9961	0	0	0	0	0	0	0	0	0
CG31950	0	0	0	0	0	0	0	0	0
jagn	0	0	0	0	0	0	0	0	0
CG12907	0	0	0	0	0	0	0	0	0
LvpD	0	0	0	0	0	0	0	0	0
CG15434	0	0	0	0	0	0	0	0	0
Act79B	0	0	0	0	0	0	0	0	0
CG16756	0	0	0	0	0	0	0	0	0
CG15554	0	0	0	0	0	0	0	0	0
CG13678	0	0	0	0	0	0	0	0	0
CG3566	0	0	0	0	0	0	0	0	0
Nplp3	0	0	0	0	0	0	0	0	0
CG3348	0	0	0	0	0	0	0	0	0
Rh6	0	0	0	0	0	0	0	0	0
CG13068	0	0	0	0	0	0	0	0	0
CG9642	0	0	0	0	0	0	0	0	0
CG12861	0	0	0	0	0	0	0	0	0
CG8565	0	0	0	0	0	0	0	0	0
CG11018	0	0	0	0	0	0	0	0	0
xmas-1	0	0	0	0	0	0	0	0	0
CG13640	0	0	0	0	0	0	0	0	0
Ork1	0	0	0	0	0	0	0	0	0
betaTub85D	0	0	0	0	0	0	0	0	0
Peritrophin-A	0	0	0	0	0	0	0	0	0
CG14282	0	0	0	0	0	0	0	0	0
CG7196	0	0	0	0	0	0	0	0	0
Act87E	0	0	0	0	0	0	0	0	0
CG30479	0	0	0	0	0	0	0	0	0
mRpS14	0	0	0	0	0	0	0	0	0
CG7135	0	0	0	0	0	0	0	0	0
CG8851	0	0	0	0	0	0	0	0	0
CG9498	0	0	0	0	0	0	0	0	0
CG4169	0	0	0	0	0	0	0	0	0
Dp	0	0	0	0	0	0	0	0	0
CG14456	0	0	0	0	0	0	0	0	0
mRpS21	0	0	0	0	0	0	0	0	0
Ccp84Af	0	0	0	0	0	0	0	0	0
SIP2	0	0	0	0	0	0	0	0	0
CG5103	0	0	0	0	0	0	0	0	0
CG11077	0	0	0	0	0	0	0	0	0
Arp53D	0	0	0	0	0	0	0	0	0
dhd	0	0	0	0	0	0	0	0	0
moody	0	0	0	0	0	0	0	0	0
CG1628	0	0	0	0	0	0	0	0	0
CG16848	0	0	0	0	0	0	0	0	0
CG18731	0	0	0	0	0	0	0	0	0
CG13476	0	0	0	0	0	0	0	0	0
hydra	0	0	0	0	0	0	0	0	0
Tapdelta	0	0	0	0	0	0	0	0	0
NP15.6	0	0	0	0	0	0	0	0	0
CG14817	0	0	0	0	0	0	0	0	0
CG3483	0	0	0	0	0	0	0	0	0
RpS10a	0	0	0	0	0	0	0	0	0
CG14384	0	0	0	0	0	0	0	0	0
CG17344	0	0	0	0	0	0	0	0	0
CG6980	0	0	0	0	0	0	0	0	0
Sps2	0	0	0	0	0	0	0	0	0
CG13168	0	0	0	0	0	0	0	0	0
CG10031	0	0	0	0	0	0	0	0	0
CG33281	0	0	0	0	0	0	0	0	0
mRpS24	0	0	0	0	0	0	0	0	0
CG5043	0	0	0	0	0	0	0	0	0
CG14457	0	0	0	0	0	0	0	0	0
CG10710	0	0	0	0	0	0	0	0	0
CG15152	0	0	0	0	0	0	0	0	0
mRpL36	0	0	0	0	0	0	0	0	0
CG12470	0	0	0	0	0	0	0	0	0
CG10839	0	0	0	0	0	0	0	0	0
CG2021	0	0	0	0	0	0	0	0	0
w-cup	0	0	0	0	0	0	0	0	0
CG4365	0	0	0	0	0	0	0	0	0
CG9548	0	0	0	0	0	0	0	0	0
CG7813	0	0	0	0	0	0	0	0	0
CG18472	0	0	0	0	0	0	0	0	0
CG31465	0	7	0	0	0	0	0	71	0
Tsp42Ea	0	0	0	0	0	0	0	0	0
CG31287	0	0	0	0	0	0	0	0	0
CG10126	0	0	0	0	0	0	0	0	0
Dpy-30L2	0	0	0	0	0	0	0	0	0
ACXA	0	0	0	0	0	0	0	0	0
CG6790	0	0	0	0	0	0	0	0	0
ACXC	0	0	0	0	0	0	0	0	0
twe	0	0	0	0	0	0	0	0	0
CG33300	0	0	0	0	0	0	0	280	0
Tsp42Ec	0	0	0	0	0	0	0	0	0
CG6737	0	0	0	0	0	0	0	0	0
CG9970	0	0	0	0	0	0	0	0	0
CG31231	0	0	0	0	0	0	0	0	0
CG14566	0	0	0	0	0	0	0	0	0
CG9313	0	0	0	0	0	0	0	0	0
Tsp42A	0	0	0	0	0	0	0	0	0
LysX	0	0	0	0	0	0	0	0	0
ct	0	0	0	0	0	0	0	0	0
CG2113	0	0	0	0	0	0	0	0	0
PebIII	0	0	0	0	0	0	0	0	0
CG31601	0	0	0	0	0	0	0	0	0
Jon25Bii	0	0	0	0	0	0	0	0	0
CG12477	0	0	0	0	0	0	0	0	0
CG15605	0	0	0	0	0	0	0	0	0
mRpS25	0	0	0	0	0	0	0	0	0
mRpS7	0	0	0	0	0	0	0	0	0
CG8021	0	0	0	0	0	0	0	0	0
CG14949	0	0	0	0	0	0	0	0	0
Pepck	0	0	0	0	0	0	0	0	0
CG12975	0	0	0	0	0	0	0	0	0
CG9861	0	0	0	0	0	0	0	0	0
CG15766	0	0	0	0	0	0	0	0	0
CG4683	0	0	0	0	0	0	0	0	0
CG14407	0	0	0	0	0	0	0	0	0
CG5614	0	0	0	0	0	0	0	0	0
Marcal1	0	0	0	0	0	0	0	0	0
CG32436	0	0	0	0	0	0	0	0	0
CG15922	0	0	0	0	0	0	0	0	0
CG5084	0	0	0	0	0	0	0	0	0
CG33347	0	0	0	0	0	0	0	0	0
CG8680	0	0	0	0	0	0	0	0	0
CG2861	0	0	0	0	0	0	0	0	0
CG15202	0	0	0	0	0	0	0	0	0
CG31870	0	0	0	0	0	0	0	0	0
CG14375	0	0	0	0	0	0	0	0	0
CG14070	0	0	0	0	0	0	0	0	0
LysS	0	0	0	0	0	0	0	0	0
CG14989	0	0	0	0	0	0	0	0	0
CG10862	0	0	0	0	0	0	0	0	0
chinmo	0	0	0	0	0	0	0	0	0
CG5213	0	0	0	0	0	0	0	0	0
CG13060	0	0	0	0	0	0	0	0	0
CG11752	0	0	0	0	0	0	0	0	0
CG13733	0	0	0	0	0	0	0	0	0
CG14740	0	0	0	0	0	0	0	0	0
RpL22-like	0	0	0	0	0	0	0	0	0
levy	0	0	0	0	0	0	0	0	0
CG10934	0	0	0	0	0	0	0	0	0
CG15034	0	0	0	0	0	0	0	0	0
CG15109	0	0	0	0	0	0	0	0	0
CG6300	0	0	0	0	0	0	0	0	0
Phk-3	0	0	0	0	0	0	0	0	0
CG17650	0	0	0	0	0	0	0	0	0
CG4907	0	0	0	0	0	0	0	0	0
CG7349	0	0	0	0	0	0	0	0	0
CG32713	0	0	0	0	0	0	0	0	0
CG8664	0	0	0	0	0	0	0	0	0
RpL12	0	0	0	0	0	0	0	0	0
mRpL48	0	0	0	0	0	0	0	0	0
schuy	0	0	0	0	0	0	0	0	0
Crk	0	0	0	0	0	0	0	0	0
Vha16-3	0	0	0	0	0	0	0	0	0
CG10749	0	0	0	0	0	0	0	0	0
Syb	0	0	0	0	0	0	0	0	0
CG15208	0	0	0	0	0	0	0	0	0
RpI12	0	0	0	0	0	0	0	0	0
CG14298	0	0	0	0	0	0	0	0	0
RpL34a	0	0	0	0	0	0	0	0	0
mRpL35	0	0	0	0	0	0	0	0	0
wupA	0	0	0	0	0	0	0	0	0
CG11825	0	0	0	0	0	0	0	0	0
CG30447	0	0	0	0	0	0	0	0	0
ttm3	0	0	0	0	0	0	0	0	0
CG4714	0	0	0	0	0	0	0	0	0
ssp5	0	0	0	0	0	0	0	0	0
Gr89a	0	0	0	0	0	0	0	0	0
GstE1	0	0	0	0	0	0	0	0	0
CG10920	0	0	0	0	0	0	0	0	0
Cyp4g1	0	0	0	0	0	0	0	0	0
CG15128	0	0	0	0	0	0	0	0	0
CG18594	0	0	0	0	0	0	0	0	0
CG9664	0	0	0	0	0	0	0	0	0
CG8907	0	0	0	0	0	0	0	0	0
ran-like	0	0	0	0	0	0	0	0	0
CG12723	0	0	0	0	0	0	0	0	0
Kua	0	0	0	0	0	0	0	0	0
CG11379	0	0	0	0	0	0	0	0	0
Rpn12R	0	0	0	0	0	0	0	0	0
CG31210	0	0	0	0	0	0	0	0	0
Cpr72Ec	0	0	0	0	0	0	0	0	0
CG14095	0	0	0	0	0	0	0	0	0
Gs1l	0	0	0	0	0	0	0	0	0
CG9106	0	0	0	0	0	0	0	0	0
RpL32	0	0	0	0	0	0	0	0	0
CG30160	0	0	0	0	0	0	0	0	0
CG1988	0	0	0	0	0	0	0	0	0
CG3621	0	0	0	0	0	0	0	0	0
skpD	0	0	0	0	0	0	0	0	0
Nplp4	0	0	0	0	0	0	0	0	0
CG1354	0	0	0	0	0	0	0	0	0
CG32198	0	0	0	0	0	0	0	0	0
CG13538	0	0	0	0	0	0	0	0	0
Klp59C	0	0	0	0	0	0	0	0	0
CG14483	0	0	0	0	0	0	0	0	0
CG1774	0	0	0	0	0	0	0	0	0
CG3337	0	0	0	0	0	0	0	0	0
CG4983	0	0	0	0	0	0	0	0	0
CG8974	0	0	0	0	0	0	0	0	0
CG1387	0	0	0	0	0	0	0	0	0
skpC	0	0	0	0	0	0	0	0	0
CG32846	0	0	0	0	0	0	0	0	0
CG13018	0	0	0	0	0	0	0	0	0
CoVa	0	0	0	0	0	0	0	0	0
CG9570	0	0	0	0	0	0	0	0	0
rev7	0	0	0	0	0	0	0	0	0
hebe	0	0	0	0	0	0	0	0	0
CG33774	0	0	0	0	0	0	0	0	0
CG11015	0	0	0	0	0	0	0	0	0
CG1958	0	0	0	0	0	0	0	0	0
CG11137	0	0	0	0	0	0	0	0	0
Os-E	0	0	0	0	0	0	0	0	0
Pbprp3	0	0	0	0	0	0	0	0	0
CG17083	0	0	0	0	0	0	0	0	0
spir	0	0	0	0	0	0	0	0	0
CG7059	0	0	0	0	0	0	0	0	0
Csas	0	0	0	0	0	0	0	0	0
CG32063	0	0	0	0	0	0	0	0	0
Grip75	0	0	0	0	0	0	0	0	0
Acox57D-d	0	0	0	0	0	0	0	0	0
nimB3	0	0	0	0	0	0	0	0	0
CG10750	0	0	0	0	0	0	0	0	0
Pino	0	0	0	0	0	0	0	0	0
CG34054	0	0	0	0	0	0	0	0	0
CG31459	0	0	0	0	0	0	0	0	0
mRpL55	0	0	0	0	0	0	0	0	0
CG12674	0	0	0	0	0	0	0	0	0
CG5537	0	0	0	0	0	0	0	0	0
RpII18	0	0	0	0	0	0	0	0	0
CG32812	0	0	0	0	0	0	0	0	0
ND23	0	0	0	0	0	0	0	0	0
CG3420	0	0	0	0	0	0	0	0	0
CG7131	0	0	0	0	0	0	0	0	0
Sse	0	0	0	0	0	0	0	0	0
CG8138	0	0	0	0	0	0	0	0	0
CG6129	0	0	0	0	0	0	0	0	0
didum	0	0	0	0	0	0	0	0	0
CG11404	0	0	0	0	0	0	0	0	0
CG33511	0	-1	0	0	0	0	0	14	0
Pif2	0	0	0	0	0	0	0	0	0
Pka-C2	0	0	0	0	0	0	0	282	0
CG15577	0	0	0	0	0	0	0	0	0
CG16965	0	0	0	0	0	0	0	0	0
CG15472	0	0	0	0	0	0	0	0	0
SdhC	0	0	0	0	0	0	0	0	0
Pp4-19C	0	0	0	0	0	0	0	0	0
Vha16-2	0	0	0	0	0	0	0	0	0
Nup44A	0	0	0	0	0	0	0	0	0
CG10182	0	0	0	0	0	0	0	0	0
Fdxh	0	0	0	0	0	0	0	0	0
Hsp60D	0	0	0	0	0	0	0	0	0
Ssb-c31a	0	0	0	0	0	0	0	0	0
CG10200	0	0	0	0	0	0	0	0	0
CG13569	0	0	0	0	0	0	0	0	0
CG4744	0	0	0	0	0	0	0	0	0
CG11044	0	0	0	0	0	0	0	0	0
Ca-P60A	0	0	0	0	0	0	0	0	0
CG12056	0	0	0	0	0	0	0	0	0
CG33635	0	0	0	0	0	0	0	0	0
Rtnl1	0	0	0	0	0	0	0	0	0
CG3473	0	0	0	0	0	0	0	0	0
CG5010	0	0	0	0	0	0	0	0	0
CycE	0	0	0	0	0	0	0	0	0
CG10307	0	0	0	0	0	0	0	0	0
Cbp20	0	0	0	0	0	0	0	0	0
CG7024	0	0	0	0	0	0	0	0	0
CG13993	0	0	0	0	0	0	0	0	0
Tsp42Er	0	0	0	0	0	0	0	0	0
CG32352	0	0	0	0	0	0	0	0	0
PGRP-LC	0	0	0	0	0	0	0	0	0
CG10219	0	0	0	0	0	0	0	0	0
HSPC300	0	0	0	0	0	0	0	0	0
DopEcR	0	0	0	0	0	0	0	0	0
Rlc1	0	0	0	0	0	0	0	0	0
CG18067	0	0	0	0	0	0	0	0	0
CG1314	0	0	0	0	0	0	0	0	0
CG15525	0	0	0	0	0	0	0	0	0
Ance-2	0	0	0	0	0	0	0	0	0
CG18132	0	0	0	0	0	0	0	0	0
CG31445	0	0	0	0	0	0	0	0	0
CG2177	0	0	0	0	0	0	0	0	0
CG13337	0	0	0	0	0	0	0	0	0
CG11251	0	0	0	0	0	0	0	0	0
CG5399	0	0	0	0	0	0	0	0	0
mRpL51	0	0	0	0	0	0	0	0	0
CG12309	0	0	0	0	0	0	0	0	0
robl	0	0	0	0	0	0	0	0	0
CG16790	0	0	0	0	0	0	0	126	0
CG31851	0	0	0	0	0	0	0	0	0
CG14096	0	0	0	0	0	0	0	0	0
CG14313	0	0	0	0	0	0	0	0	0
Spn6	0	0	0	0	0	0	0	0	0
CG32039	0	0	0	0	0	0	0	0	0
r	0	0	0	0	0	0	0	0	0
CG14210	0	0	0	0	0	0	0	0	0
CG6951	0	0	0	0	0	0	0	0	0
CG14355	0	0	0	0	0	0	0	0	0
CG33333	0	0	0	0	0	0	0	0	0
CG4198	0	0	0	0	0	0	0	0	0
CG13423	0	0	0	0	0	0	0	0	0
Nep1	0	0	0	0	0	0	0	0	0
CG8746	0	0	0	0	0	0	0	0	0
CG13794	0	0	0	0	0	0	0	0	0
CG15764	0	0	0	0	0	0	0	0	0
CG31907	0	0	0	0	0	0	0	0	0
CG31533	0	0	0	0	0	0	0	0	0
CG3581	0	0	0	0	0	0	0	0	0
PKA-C2	0	0	0	0	0	0	0	0	0
CG13841	0	0	0	0	0	0	0	0	0
CG32695	0	0	0	0	0	0	0	0	0
Cpr67Fb	0	0	0	0	0	0	0	0	0
A3-3	0	0	0	0	0	0	0	0	0
CG14543	0	0	0	0	0	0	0	0	0
BubR1	0	0	0	0	0	0	0	0	0
CG18266	0	0	0	0	0	0	0	0	0
Prx6005	0	0	0	0	0	0	0	0	0
CG5676	0	0	0	0	0	0	0	0	0
CG14752	0	0	0	0	0	0	0	0	0
CG8009	0	0	0	0	0	0	0	0	0
msd5	0	0	0	0	0	0	0	0	0
CG12069	0	0	0	0	0	0	0	0	0
Jon25Biii	0	0	0	0	0	0	0	0	0
Npc2f	0	0	0	0	0	0	0	0	0
CG5498	0	0	0	0	0	0	0	0	0
GstD7	0	0	0	0	0	0	0	0	0
Taf12L	0	0	0	0	0	0	0	0	0
mRpS17	0	0	0	0	0	0	0	0	0
He	0	0	0	0	0	0	0	0	0
CG31019	0	0	0	0	0	0	0	0	0
CG3835	0	0	0	0	0	0	0	0	0
rut	0	0	0	0	0	0	0	0	0
Npc2d	0	0	0	0	0	0	0	0	0
CG32319	0	0	0	0	0	0	0	139	0
CG3927	0	0	0	0	0	0	0	0	0
CG12912	0	0	0	0	0	0	0	0	0
CG5376	0	0	0	0	0	0	0	0	0
CG14870	0	0	0	0	0	0	0	0	0
Elo68alpha	0	0	0	0	0	0	0	0	0
CG10051	0	0	0	0	0	0	0	0	0
CG10761	0	0	0	0	0	0	0	0	0
CG14661	0	0	0	0	0	0	0	0	0
Tim17b1	0	0	0	0	0	0	0	0	0
RpS19b	0	0	0	0	0	0	0	0	0
capa	0	0	0	0	0	0	0	0	0
CG33217	0	0	0	0	0	0	0	0	0
CG13239	0	0	0	0	0	0	0	0	0
RpS15	0	0	0	0	0	0	0	0	0
CG16712	0	0	0	0	0	0	0	0	0
MAGE	0	0	0	0	0	0	0	0	0
CG8993	0	0	0	0	0	0	0	0	0
Ugt86De	0	0	0	0	0	0	0	0	0
CG15035	0	0	0	0	0	0	0	0	0
CG6140	0	0	0	0	0	0	0	0	0
CG13243	0	0	0	0	0	0	0	0	0
[truncated: 10,067 more rows]
