# Supplementary material for: A Shared Role for RBF1 and dCAP-D3 in the Regulation of Transcription with Consequences for Innate Immunity
Source: PLoS Genet. 2012 Apr 5;8(4):e1002618. doi: 10.1371/journal.pgen.1002618 (PMC3320600; doi:10.1371/journal.pgen.1002618)
Supplement: Table S4 — dCAP-D3/RBF1 do not regulate the majority of genes previously reported to be involved in phagocytosis. Microarray data from dCAP-D3 mutant adult flies vs. wild type flies (Table S1) was analyzed for changes to transcript levels of 19 genes previously reported to be involved in phagocytosis (Column A). Only two genes were shown to be misregulated in the mutant flies (Columns B and C). (XLS) [file pgen.1002618.s013.xls]

## Sheet: Sheet1
Gene Name	Sig Δ in dCAP-D3 adults?	Sig Δ in RBF1 adults?			Key:
Toll	no	no			Column A=name of gene involved in phagocytosis
Jnk	no	no			Column B= indicates whether there was a signifcant log fold change in transcript levels according to microarray data for dCAP-D3 mutant adults
TEP2	no	no			Column C= indicates whether there was a signifcant log fold change in transcript levels according to microarray data for RBF1 mutant adults
TEP4	no	no
domino	no	no
SrCl	no	no
PGRP-LC	no	no
Eater	no	no
Srp	no	no
Psidin	no	no
Draper	no	no
NimC4	no	no
NimC1	yes-upregulated	yes-upregulated
JAK	no	no
STAT92E	no	no
dome	no	no
lozenge	no	no
gcm	no	no
gcm2	yes-downregulated	yes-downregulated
